# Supplementary material for: Computationally guided circularly polarized luminescence simulations in chiral adaptive supramolecular systems
Source: Royal Society of Chemistry journal article supplement (doi:10.1039/d4tc03220a), 2024-01-01
Supplement: d4tc03220a1.pdf [file d4tc03220a1.pdf]

## SUPPORTING INFORMATION

### Computationally guided circularly polarized luminescence simulations in chiral adaptive supramolecular systems

*Giovanni Bella, Antonio Santoro, Giuseppe Bruno*

|                                                                                                                                                                                                                |    |
|----------------------------------------------------------------------------------------------------------------------------------------------------------------------------------------------------------------|----|
| <b>Figure S1.</b> Homo-dimers DFT optimizations.....                                                                                                                                                           | 2  |
| <b>Figure S2.</b> PP <sub>cage</sub> ⊃homo-dimers DFT optimizations.....                                                                                                                                       | 3  |
| <b>Figure S3.</b> Intermolecular hydrogen bondings in optimized PP <sub>cage</sub> ⊃homo-dimers.....                                                                                                           | 4  |
| <b>Figure S4.</b> NCI mapped surfaces for optimized PP <sub>cage</sub> ⊃TT2 complex.....                                                                                                                       | 4  |
| <b>Figure S5.</b> NCI mapped surfaces for optimized PP <sub>cage</sub> ⊃TT1 complex.....                                                                                                                       | 5  |
| <b>Figure S6.</b> Geometrical comparisons of PP <sub>cage</sub> ⊃AA2, PP <sub>cage</sub> ⊃TT2 and PP <sub>cage</sub> ⊃CC1 with and without monophosphate.....                                                  | 6  |
| <b>Figure S7.</b> H-bonded distance comparisons between homo-dimers (AA2, TT2 and CC1) and PP <sub>cage</sub> ⊃homo-dimers (PP <sub>cage</sub> ⊃AA2, PP <sub>cage</sub> ⊃TT2 and PP <sub>cage</sub> ⊃CC1)..... | 7  |
| <b>Figure S8.</b> H-bonding distances evolution in S1 for PP <sub>cage</sub> ⊃TT2.....                                                                                                                         | 7  |
| <b>Figure S9.</b> H-bonding distances evolution in S1 for PP <sub>cage</sub> ⊃CC1.....                                                                                                                         | 7  |
| <b>Figure S10.</b> H-bonding distances evolution in S1 for PP <sub>cage</sub> ⊃AA2.....                                                                                                                        | 8  |
| <b>Figure S11.</b> H-bonding distances normal distributions in S1 for PP <sub>cage</sub> ⊃CC1.....                                                                                                             | 8  |
| <b>Figure S12.</b> H-bonding distances normal distributions in S1 for PP <sub>cage</sub> ⊃TT2.....                                                                                                             | 8  |
| <b>Figure S13.</b> H-bonding distances normal distributions in S1 for PP <sub>cage</sub> ⊃AA2.....                                                                                                             | 9  |
| <b>Table S1.</b> Rotational strengths for PP <sub>cage</sub> ⊃TT2 at M06L and MN12L/6-311G(d,p) level.....                                                                                                     | 9  |
| <b>Figure S14.</b> Intermolecular hydrogen bondings in optimized MM/PP <sub>cage</sub> ⊃(D/L) dipeptides homo-pairs.....                                                                                       | 10 |
| <b>Figure S15.</b> DFT-optimized energy levels for MM/PP <sub>cage</sub> ⊃(D/L) dipeptides homo-pairs.....                                                                                                     | 10 |
| <b>FigureS16.</b> PPP⊃3S and MMM⊃3R DFT optimizations.....                                                                                                                                                     | 11 |
| <b>FigureS17.</b> PPP⊃3L and MMM⊃3D DFT optimizations.....                                                                                                                                                     | 11 |
| <b>Cartesian coordinates</b> .....                                                                                                                                                                             | 12 |

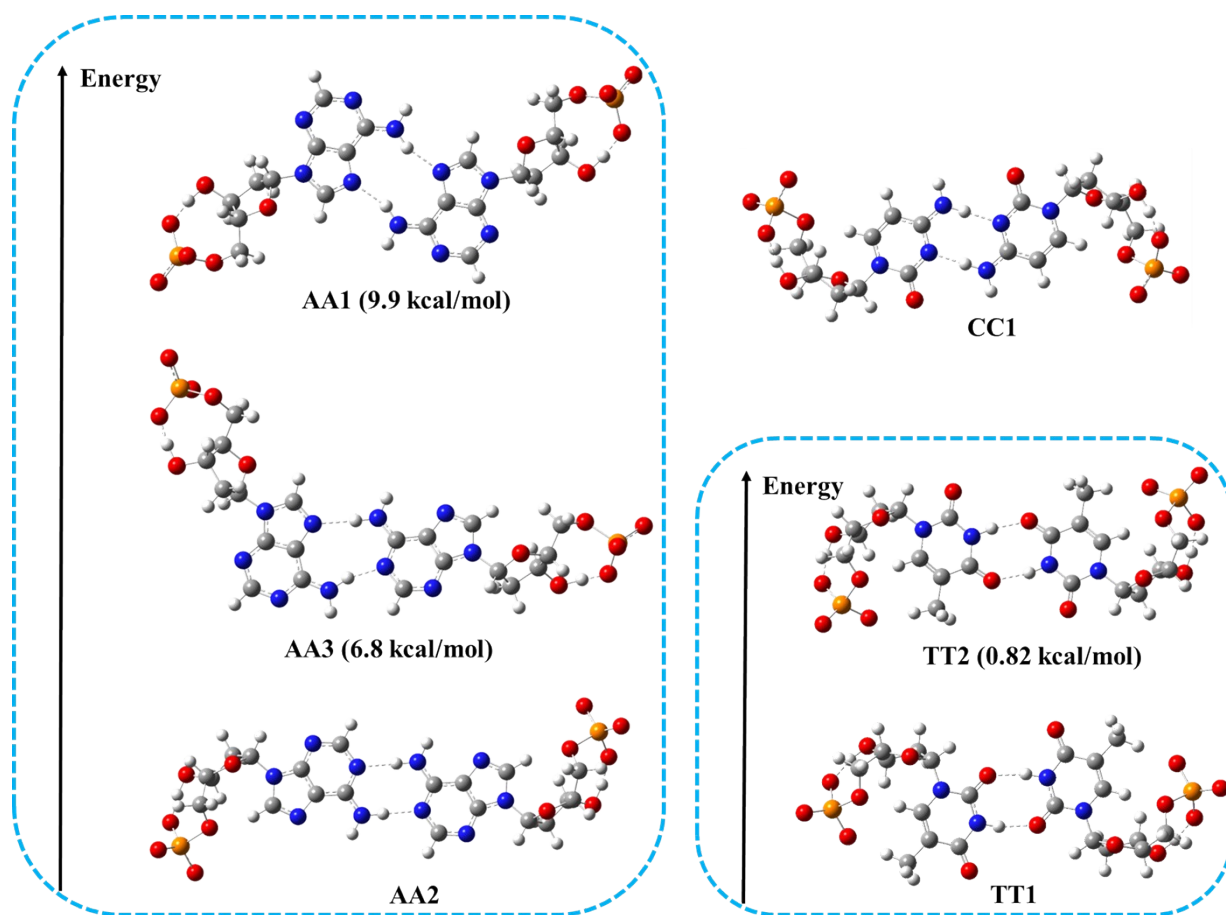

**Fig. S1.** DFT-optimized homo-dimers ( $\omega$ B97XD/6-311G(d,p) level in gas phase), both inter- and intramolecular hydrogen bonds are illustrated with single dotted lines.

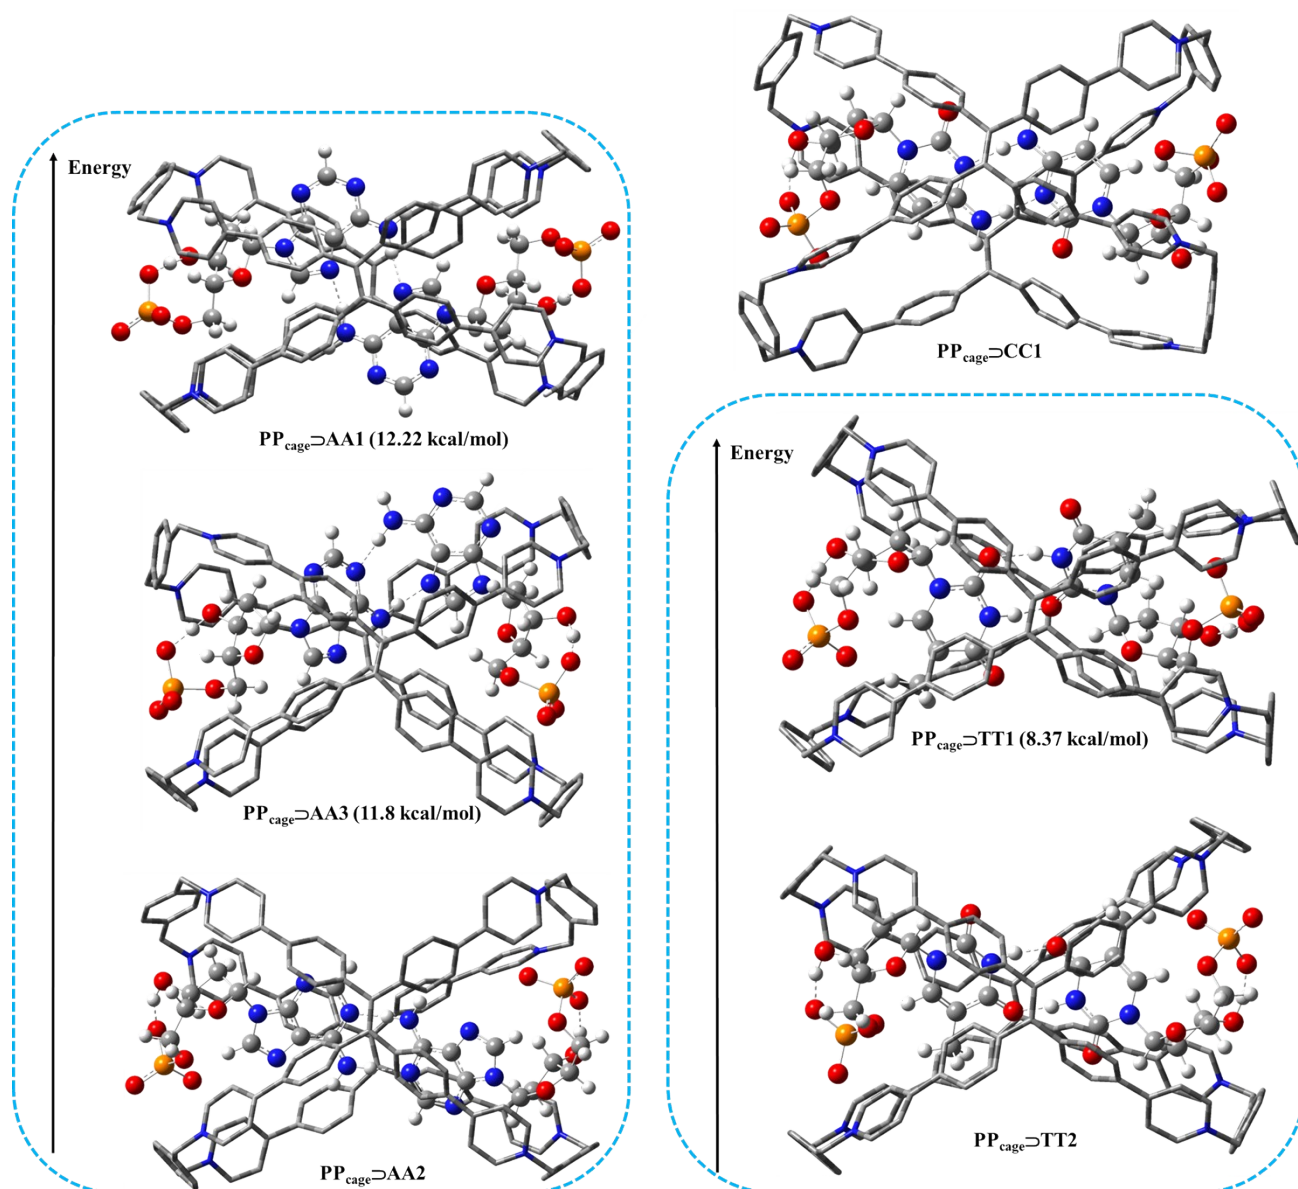

Fig. S2. DFT-optimized PP<sub>cage</sub>→homo-dimers ( $\omega$ B97XD/6-311G(d,p) level in gas phase), the hydrogen atoms of the cages were omitted for clarity.

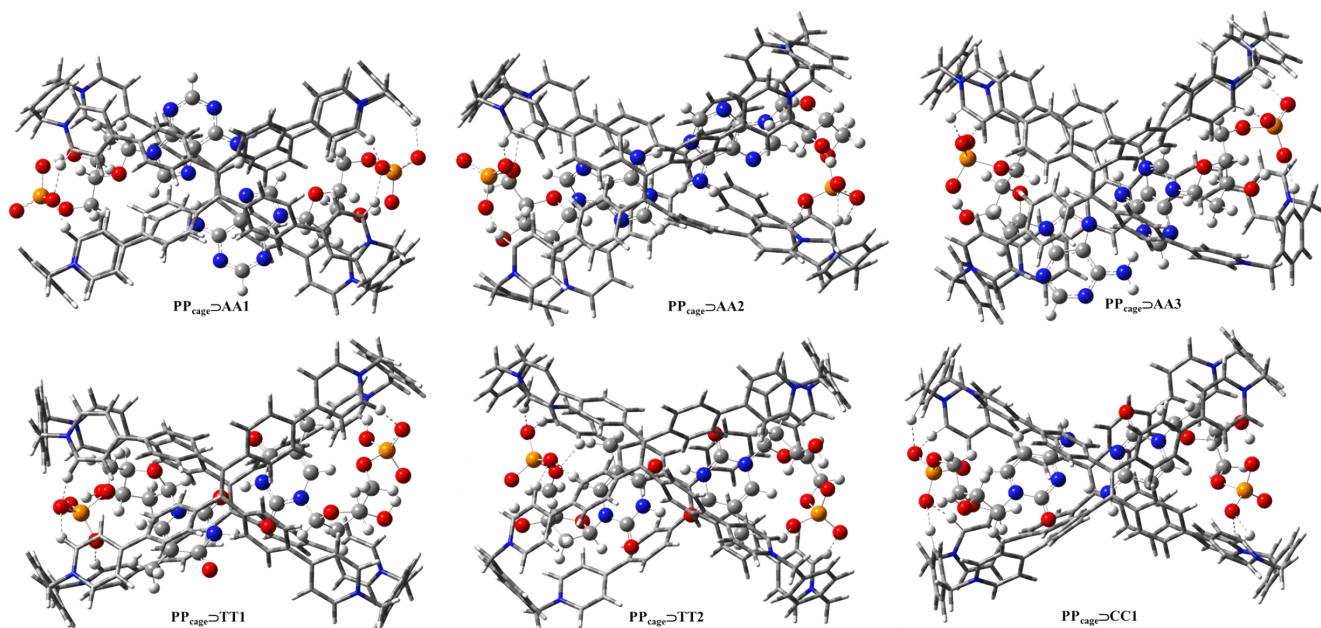

**Fig. S3.** DFT-optimized  $PP_{cage} \rightarrow$  homo-dimers ( $\omega$ B97XD/6-311G(d,p) level in gas phase), intermolecular hydrogen bonds between monophosphate and phenyl/pyridinium rings are illustrated with single dotted lines.

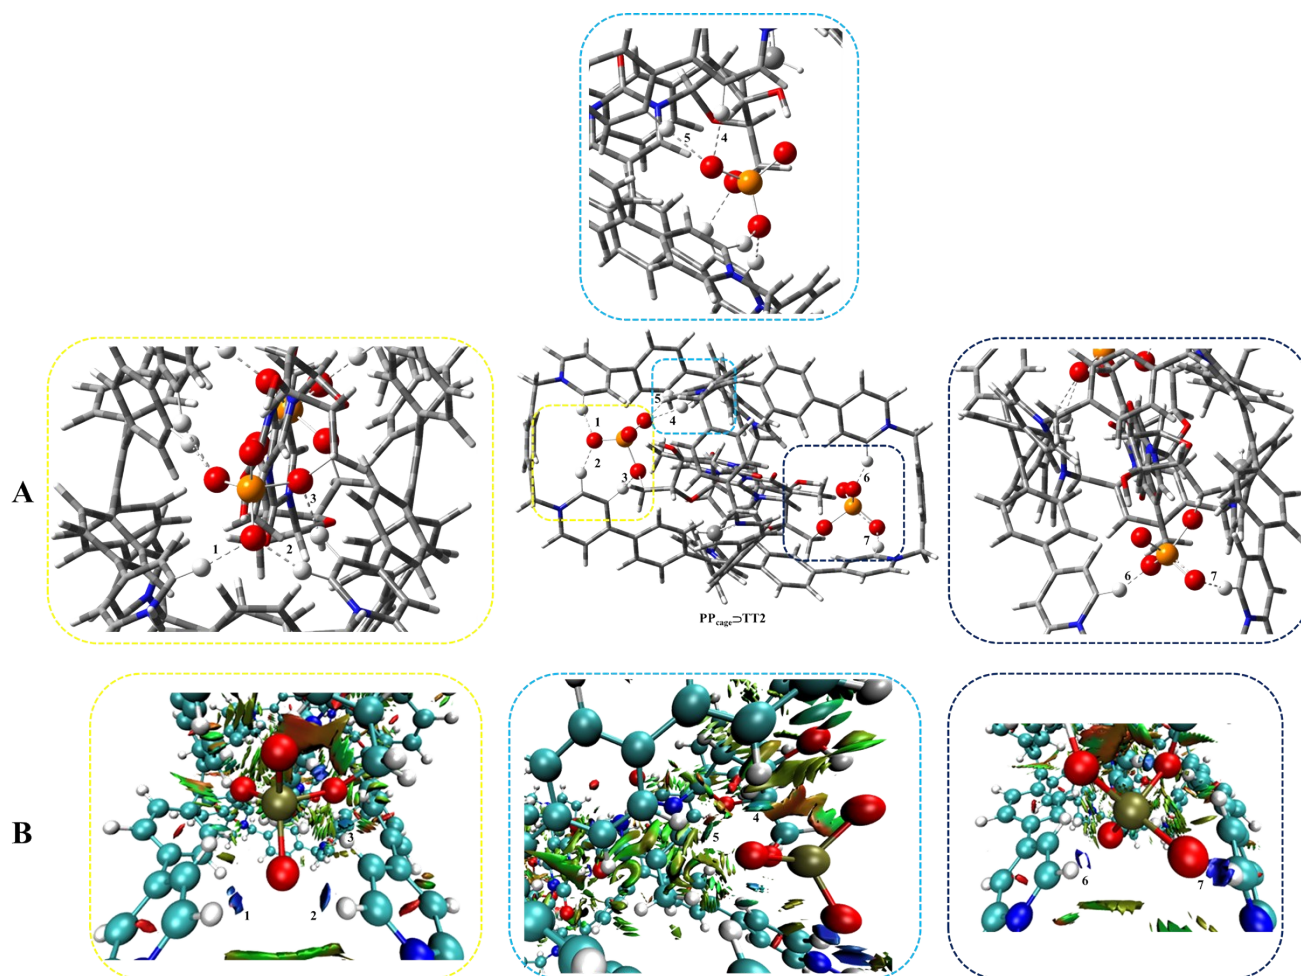

**Fig. S4.** (A) Partitioning of the multiple hydrogen bonds between monophosphate and phenyl/pyridinium rings in  $PP_{cage} \rightarrow TT2$  complex. (B) NCI mapped surfaces related to part A.

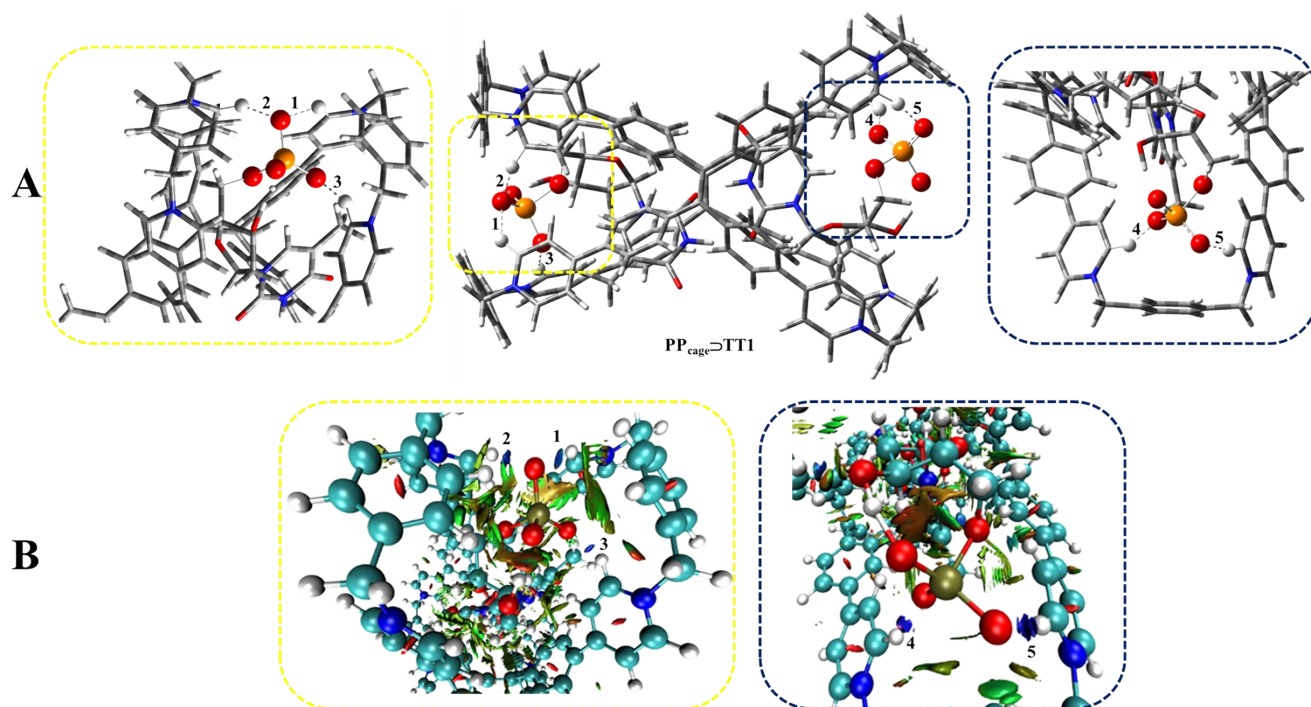

**Fig. S5.** (A) Partitioning of the multiple hydrogen bonds between monophosphate and phenyl/pyridinium rings in PP<sub>cage⇌TT1</sub> complex. (B) NCI mapped surfaces related to part A.

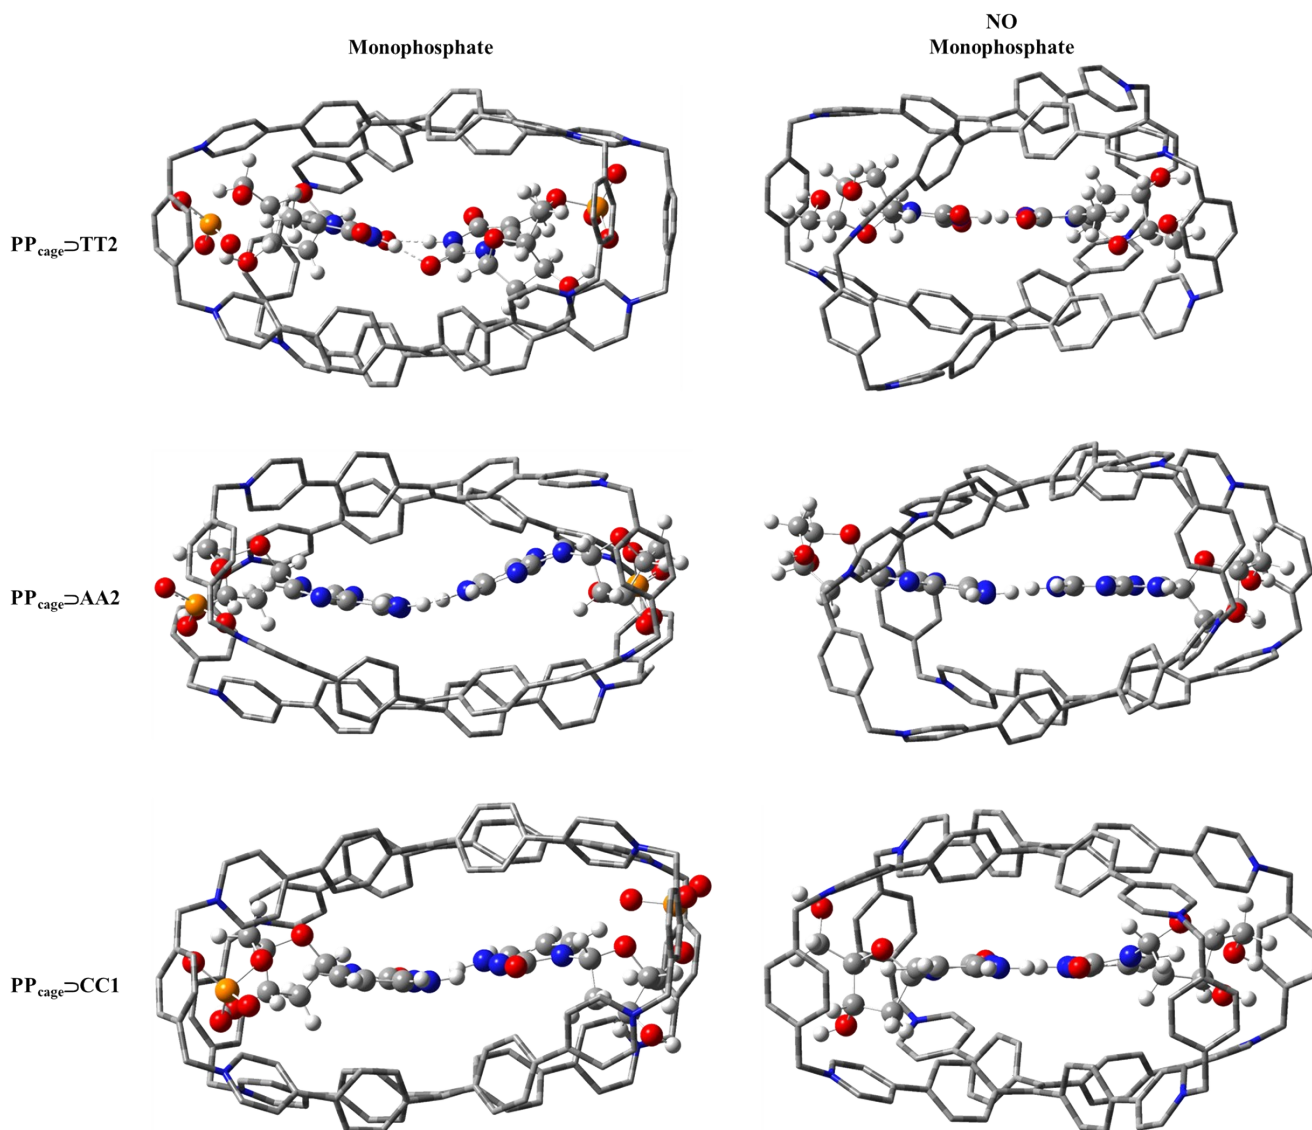

**Fig. S6.** DFT-optimization ( $\omega$ B97XD/6-311G(d,p) level in gas phase) comparisons of PP<sub>cage</sub>→AA2, PP<sub>cage</sub>→TT2 and PP<sub>cage</sub>→CC1 with and without the PO<sub>4</sub><sup>2-</sup>. The monophosphate groups were substituted with CH<sub>2</sub>-OH fragments in position 3. The hydrogen atoms of the cages were omitted for clarity.

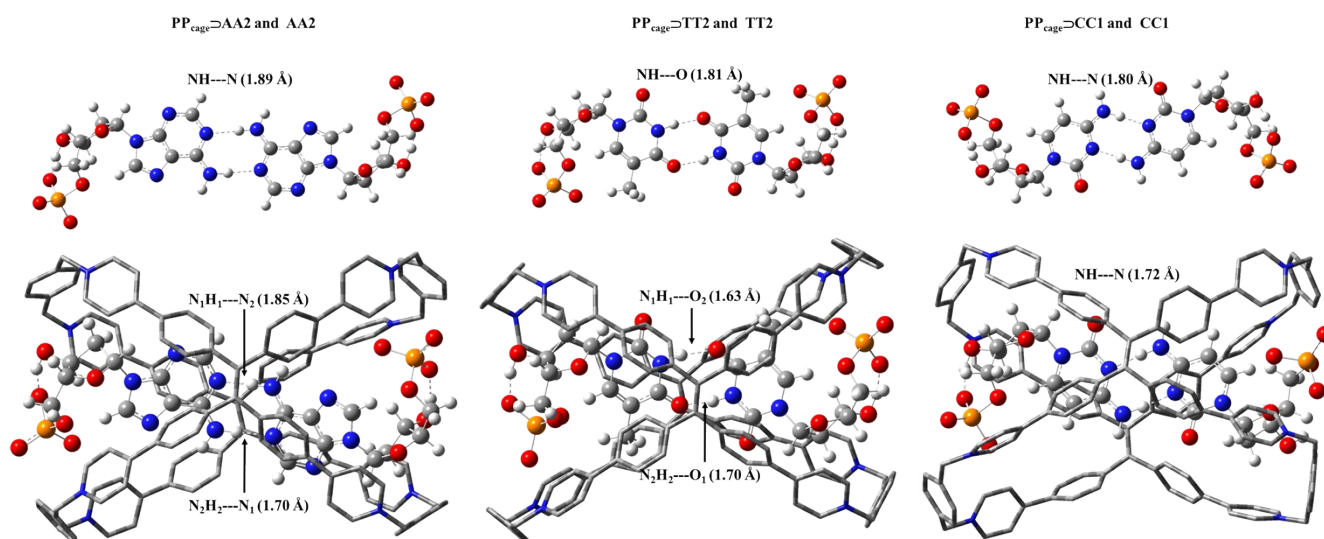

**Fig. S7.** H-bonded distance comparisons in the supramolecular nucleobase adducts ( $\omega$ B97XD/6-311G(d,p) level in gas phase) between AA2, TT2 and CC1 and their relative more stable complexed homo-dimers (PP<sub>cage</sub>→AA2, PP<sub>cage</sub>→TT2 and PP<sub>cage</sub>→CC1). The hydrogen atoms of the cages were omitted for clarity.

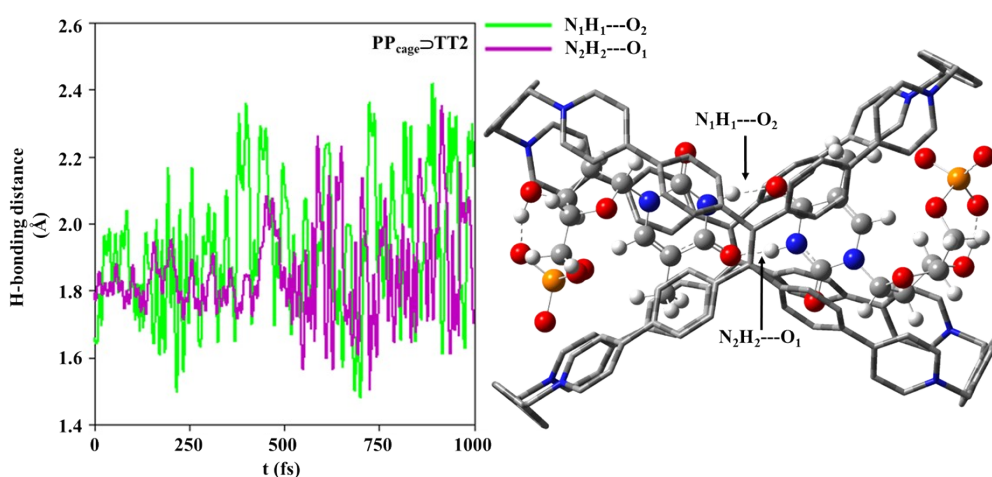

**Fig. S8.** H-bonding distance evolution plots of BOMD trajectories (S1) computed at  $\omega$ B97XD/6-311G(d,p) level in solvent phase (H<sub>2</sub>O) for PP<sub>cage</sub>→TT2. The hydrogen atoms of the cage were omitted for clarity.

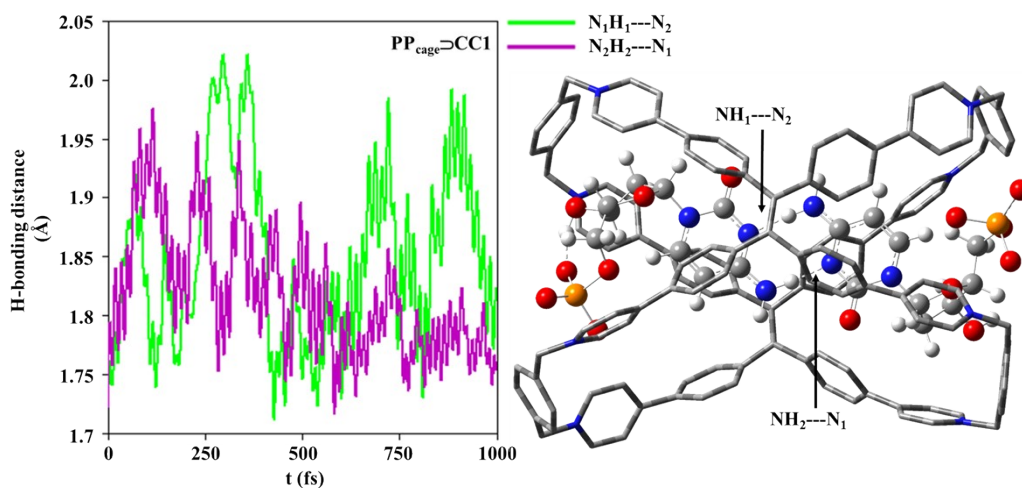

**Fig. S9.** H-bonding distance evolution plots of BOMD trajectories (S1) computed at  $\omega$ B97XD/6-311G(d,p) level in solvent phase (H<sub>2</sub>O) for PP<sub>cage</sub>→CC1. The hydrogen atoms of the cage were omitted for clarity.

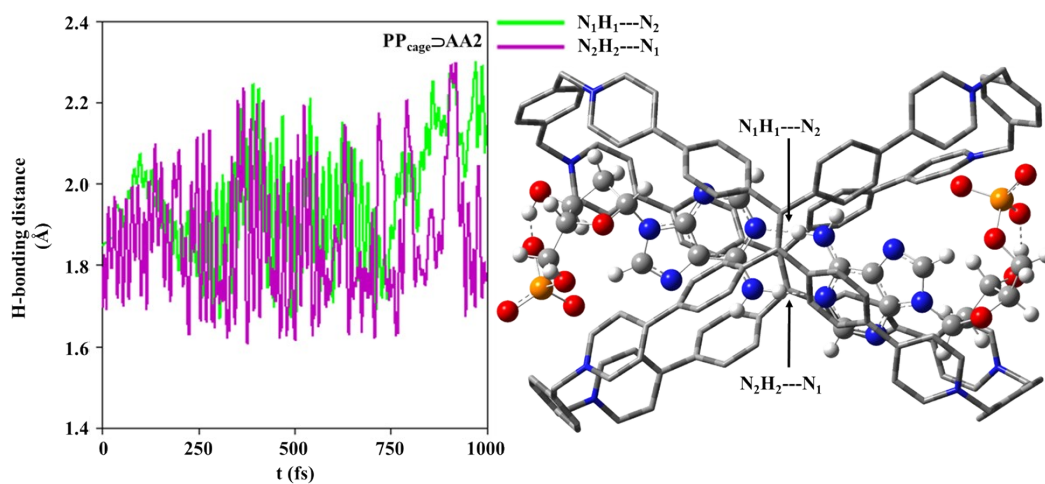

**Fig. S10.** H-bonding distance evolution plots of BOMD trajectories (S1) computed at  $\omega$ B97XD/6-311G(d,p) level in solvent phase (H<sub>2</sub>O) for PP<sub>cage</sub>→AA2. The hydrogen atoms of the cage were omitted for clarity.

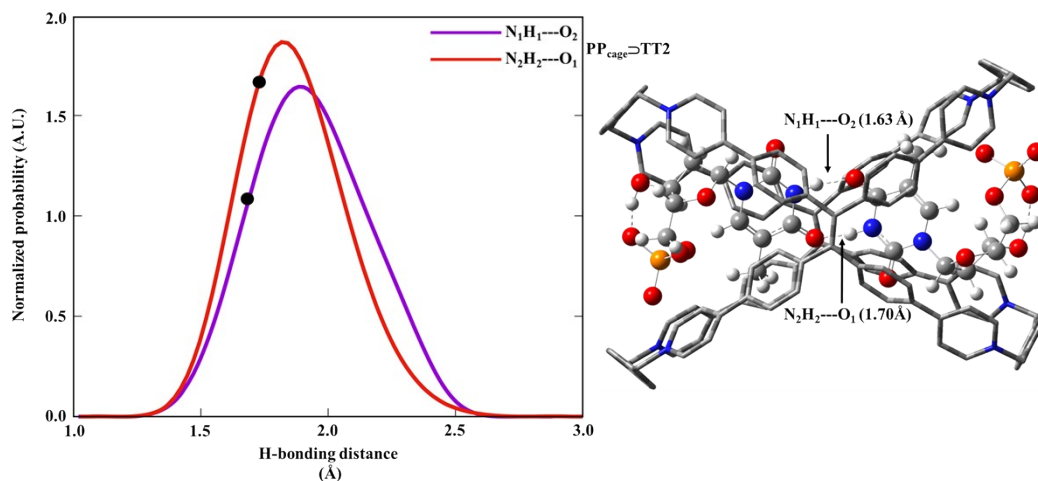

**Fig. S11.** Distribution functions of H-bonding distances as obtained from the first excited state molecular dynamics in  $H_2O$  for  $PP_{\text{cage}} \rightarrow TT2$ . Black circles and the expressed supramolecular lengths indicate the relative values for the  $S_0$  optimization. The hydrogen atoms of the cage were omitted for clarity.

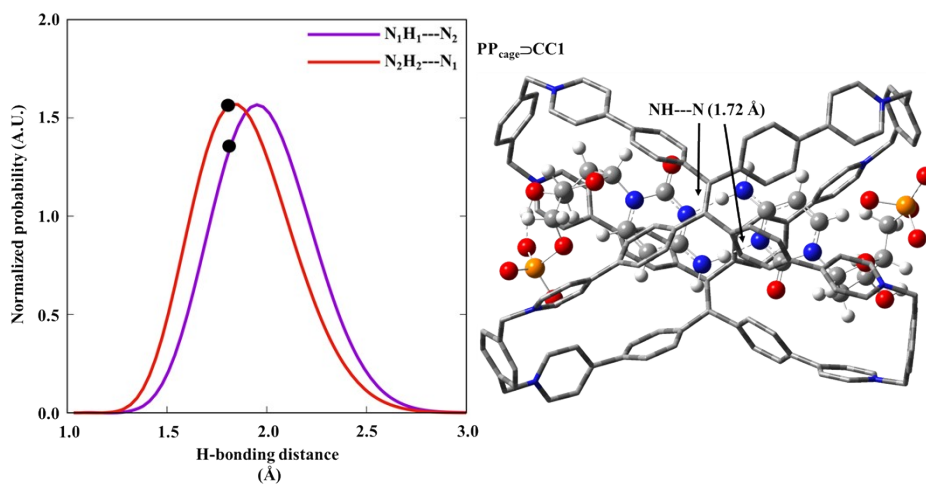

**Fig. S12.** Distribution functions of H-bonding distances as obtained from the first excited state molecular dynamics in  $H_2O$  for  $PP_{\text{cage}} \rightarrow CC1$ . Black circles and the expressed supramolecular lengths indicate the relative values for the  $S_0$  optimization. The hydrogen atoms of the cage were omitted for clarity.

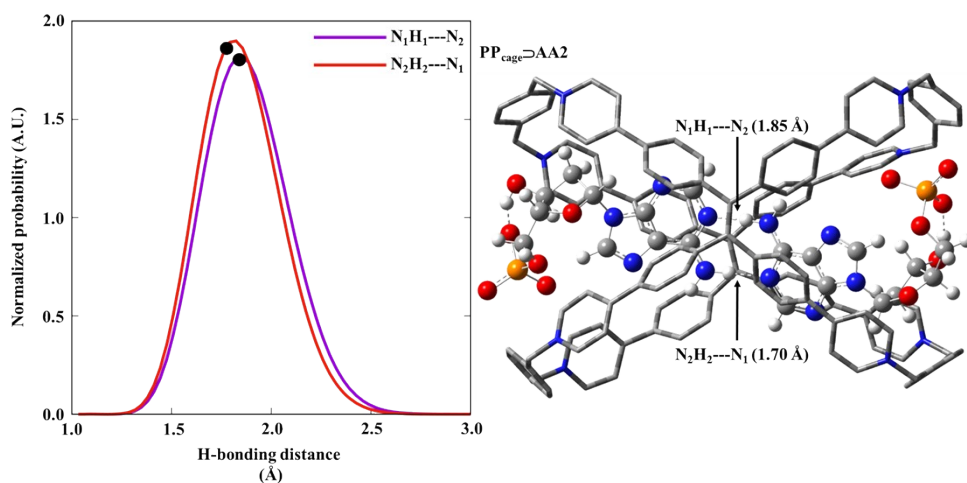

**Fig. S13.** Distribution functions of H-bonding distances as obtained from the first excited state molecular dynamics in  $H_2O$  for  $PP_{\text{cage}} \rightarrow AA2$ . Black circles and the expressed supramolecular lengths indicate the relative values for the  $S_0$  optimization. The hydrogen atoms of the cage were omitted for clarity.



**Table S1.** Computed rotational strengths for  $PP_{\text{cage}} \rightarrow TT2$  at M06L and MN12L/6-311G(d,p) level.

| Time<br>(fs) | Rlength<br>(cgs units) |         |
|--------------|------------------------|---------|
|              | MN12L                  | M06L    |
| 0            | -0.3412                | -0.1635 |
| 40           | -0.0381                | 0.1044  |
| 80           | -0.0504                | -0.0180 |
| 120          | 0.6926                 | 0.4577  |
| 160          | -0.0772                | -0.1244 |
| 200          | 0.2286                 | 0.1310  |
| 240          | 0.4330                 | 0.1404  |
| 300          | 0.7195                 | 0.0757  |
| 340          | -0.0711                | -0.0602 |
| 380          | -6.6175                | 0.7627  |
| 420          | 0.0412                 | -0.0051 |
| 460          | -0.0339                | -0.0207 |
| 500          | -0.0696                | -0.0142 |
| 540          | 0.0257                 | 0.0023  |
| 580          | -0.2749                | -0.1750 |
| 620          | -0.3736                | -0.2676 |
| 660          | 0.0003                 | 0.0027  |
| 700          | -0.0275                | -0.0046 |
| 740          | 0.0328                 | 0.0359  |
| 780          | -0.5840                | -0.6563 |
| 820          | -0.0112                | -0.0028 |
| 880          | -0.6195                | -0.1270 |
| 920          | 0.0276                 | 0.0146  |
| 960          | -0.1036                | -0.0163 |
| 1000         | 0.0206                 | -0.0116 |

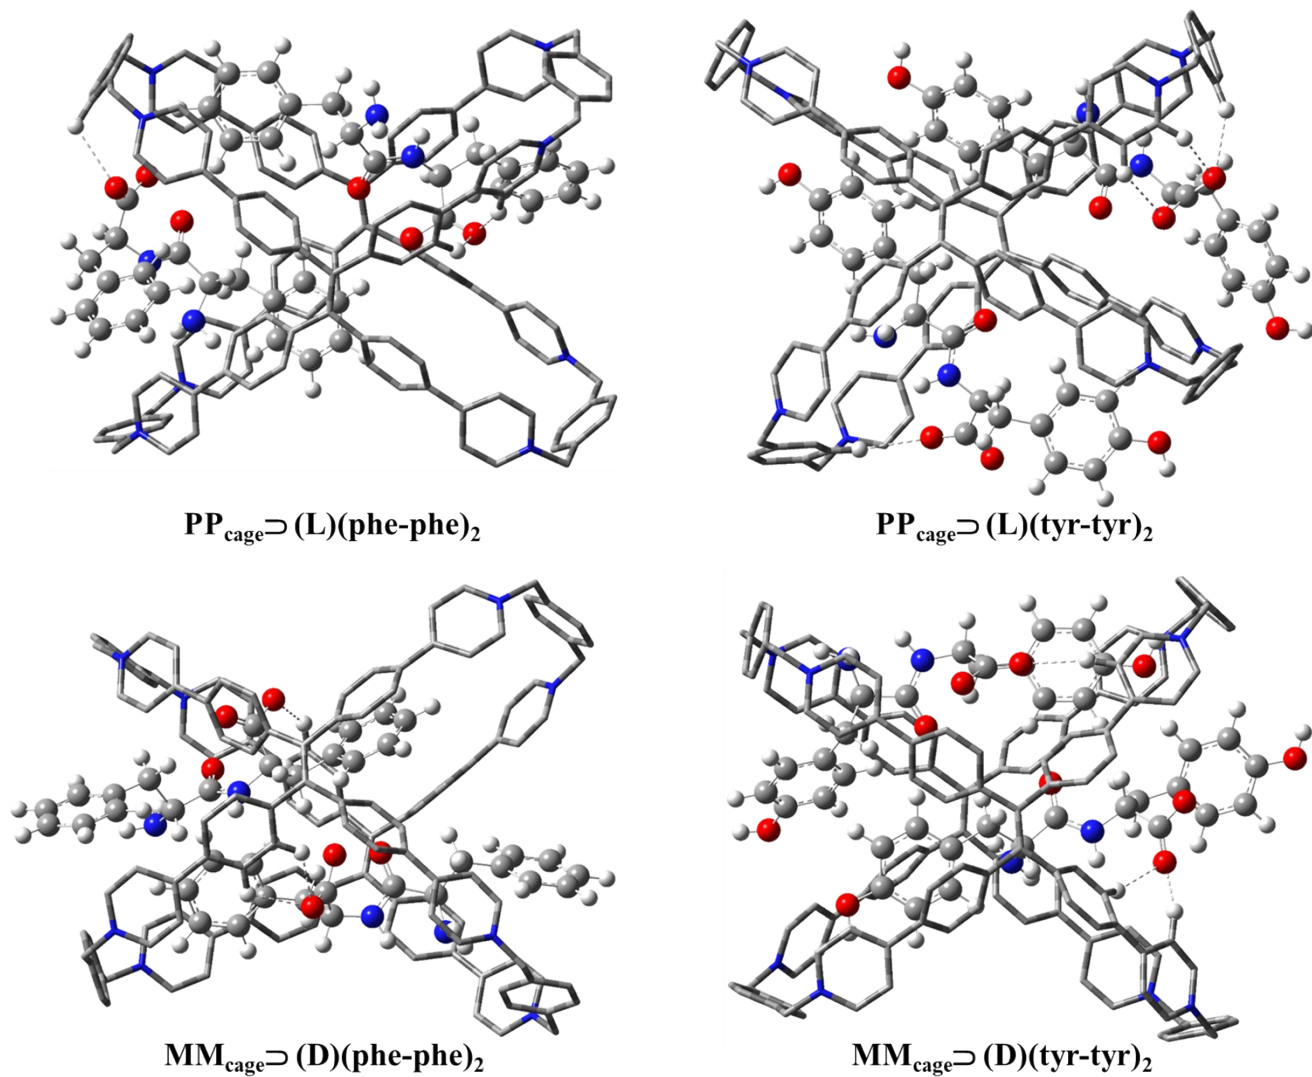

**Fig. S14.** DFT-optimized PP<sub>cage</sub>⊃(L)(phe-phe)<sub>2</sub>, PP<sub>cage</sub>⊃(L)(tyr-tyr)<sub>2</sub>, MM<sub>cage</sub>⊃(D)(phe-phe)<sub>2</sub> and MM<sub>cage</sub>⊃(D)(tyr-tyr)<sub>2</sub> (ωB97XD/6-311G(d,p) level in gas phase), intermolecular hydrogen bonds between carboxylate and phenyl/pyridinium rings are illustrated with single dotted lines. The hydrogen atoms of the cages not involved in H-bonds were omitted for clarity.

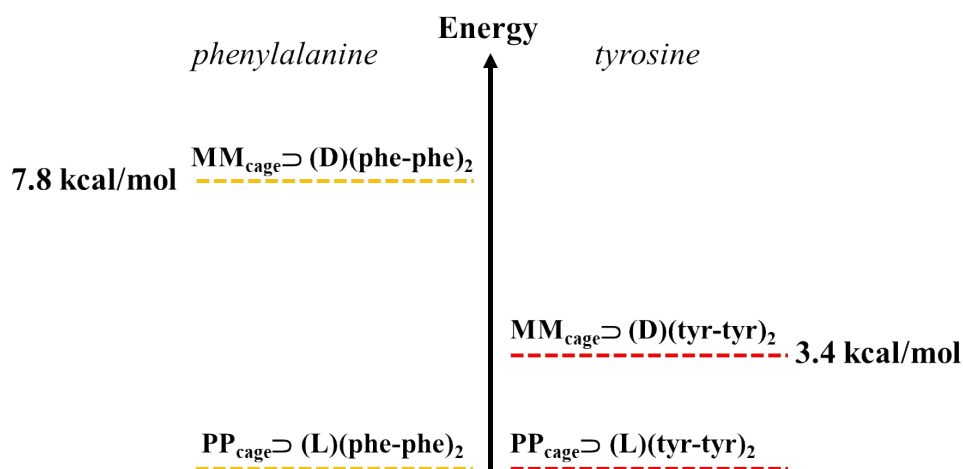

**Fig. S15.** DFT-optimized energy levels for PP<sub>cage</sub>⊃(L)(phe-phe)<sub>2</sub>, PP<sub>cage</sub>⊃(L)(tyr-tyr)<sub>2</sub>, MM<sub>cage</sub>⊃(D)(phe-phe)<sub>2</sub> and MM<sub>cage</sub>⊃(D)(tyr-tyr)<sub>2</sub> (ωB97XD/6-311G(d,p) level in gas phase).

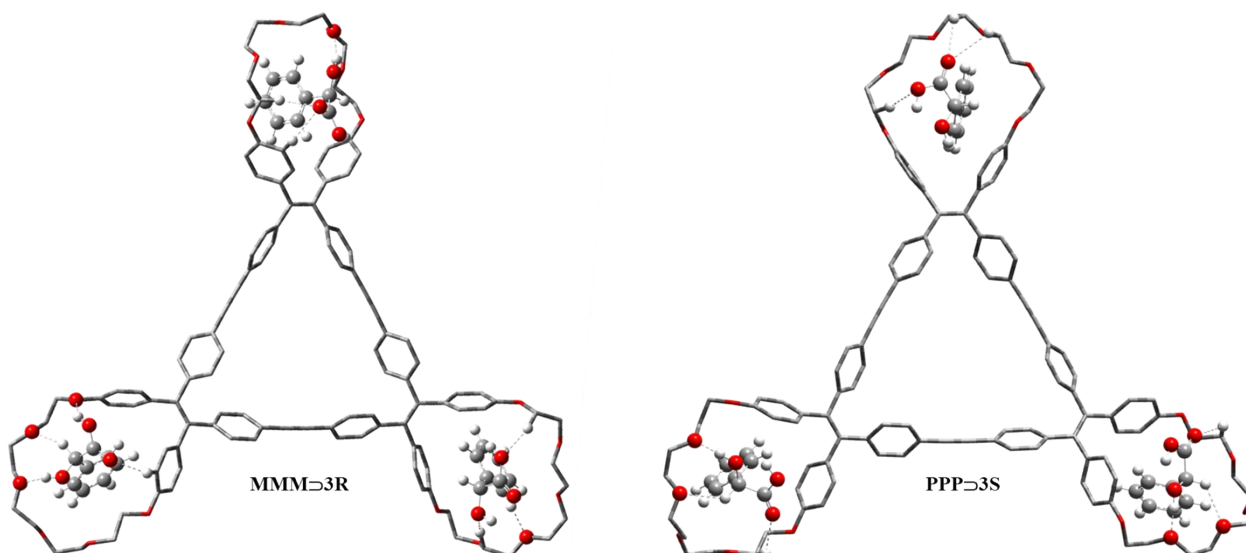

**Fig. S16.** DFT-optimized MMM⊃3R and PPP⊃3S ( $\omega$ B97XD/6-311G(d,p) level in gas phase), intermolecular hydrogen bonds between S/R-mandelic acid and the crown ethers are illustrated with single dotted lines. The hydrogen atoms of the macrocycles not involved in H-bonds were omitted for clarity.

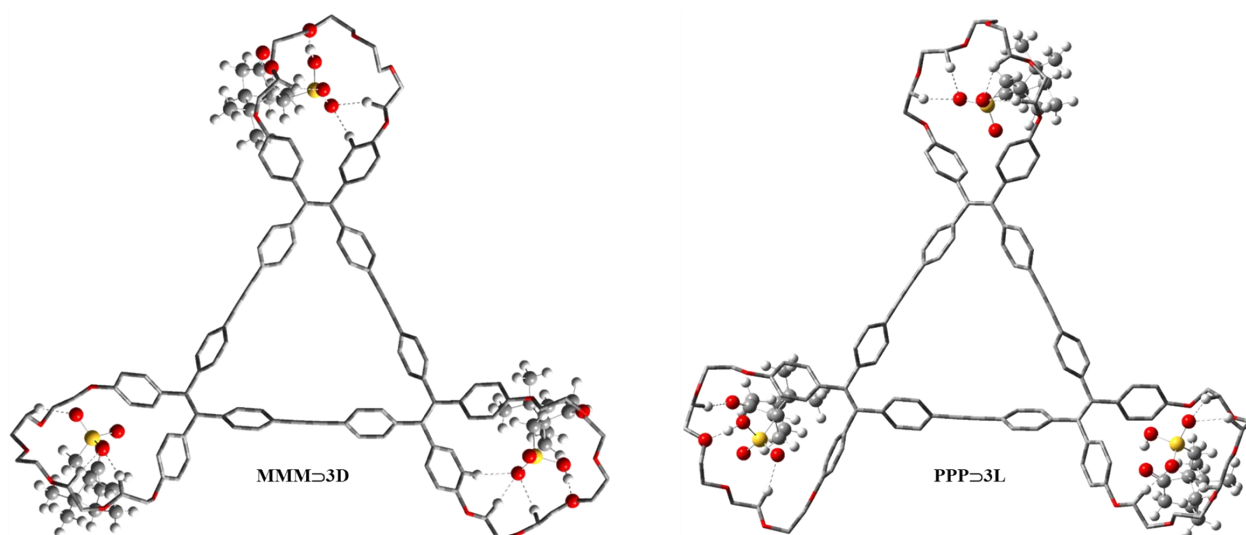

**Fig. S17.** DFT-optimized MMM⊃3D and PPP⊃3L ( $\omega$ B97XD/6-311G(d,p) level in gas phase), intermolecular hydrogen bonds between D/L-camphorsulfonic acid and the crown ethers are illustrated with single dotted lines. The hydrogen atoms of the macrocycles not involved in H-bonds were omitted for clarity.

Cartesian coordinates in gas phase  $\omega$ B97XD/6-311G(d,p)

*PP*<sub>cage</sub>  $\Rightarrow$  *TT2*

|   | X          | Y          | Z          |
|---|------------|------------|------------|
| C | 3.0005020  | -4.6640880 | 3.1424250  |
| N | 6.4930770  | -6.6537660 | 1.6708220  |
| C | 0.7825840  | -3.0400730 | 3.8181140  |
| C | 7.7209250  | -7.2325440 | 1.0181950  |
| H | 8.5080460  | -7.2683860 | 1.7739410  |
| H | 7.4793810  | -8.2592770 | 0.7350330  |
| C | 2.9480420  | -4.0034720 | 4.3872540  |
| H | 3.7564480  | -4.1137210 | 5.1032040  |
| C | 9.5153720  | -4.6608690 | -1.1732970 |
| H | 10.3043500 | -3.9266250 | -1.0639480 |
| C | 8.1350350  | -6.4006170 | -0.1812890 |
| C | 0.5440200  | 1.3605080  | -4.4552180 |
| N | 7.9915070  | -2.9166150 | -3.8636630 |
| C | 5.5026020  | -4.9815030 | 3.0664600  |
| H | 5.6442640  | -4.1271780 | 3.7126180  |
| C | 2.7899270  | 0.9280540  | -3.3657420 |
| H | 2.5347590  | 1.6390970  | -2.5912740 |
| C | 5.8187440  | -2.6662280 | -4.8270450 |
| H | 5.0384480  | -3.1016970 | -5.4357520 |
| C | 1.8453060  | -3.2150170 | 4.7255930  |
| H | 1.8188010  | -2.7115790 | 5.6855300  |
| C | 7.4533980  | -6.5335630 | -1.4038010 |
| H | 6.6717380  | -7.2792860 | -1.5207750 |
| C | 4.2017140  | -5.3981600 | 2.6971840  |
| C | 4.0231160  | 0.2786500  | -3.3029740 |
| H | 4.7045060  | 0.5220440  | -2.4862750 |
| C | 5.6458980  | -1.4107140 | -4.1880620 |
| C | 8.8090110  | -4.7589330 | -2.3785830 |
| C | 1.8745540  | 0.6780640  | -4.4066990 |

|   |            |            |            |
|---|------------|------------|------------|
| C | 2.2218040  | -0.2745800 | -5.3831710 |
| H | 1.5330520  | -0.4912990 | -6.1931170 |
| C | 1.9023180  | -4.5469100 | 2.2661550  |
| H | 1.9148650  | -5.0037250 | 1.2828980  |
| C | 0.8137150  | -3.7415820 | 2.5978170  |
| H | 0.0055750  | -3.6273570 | 1.8829860  |
| C | 6.7378320  | -0.9163430 | -3.4416370 |
| H | 6.6944500  | 0.0369480  | -2.9134020 |
| C | 7.8897270  | -1.6818910 | -3.2968510 |
| H | 8.7293330  | -1.3161040 | -2.7257520 |
| C | 6.6174630  | -5.6145930 | 2.5434490  |
| H | 7.6245840  | -5.3009030 | 2.7827210  |
| C | 4.1119040  | -6.5016270 | 1.8166180  |
| H | 3.1507350  | -6.8999190 | 1.5206600  |
| C | 5.2572140  | -7.1035410 | 1.3213940  |
| H | 5.2160310  | -7.9475100 | 0.6465010  |
| C | 6.9810240  | -3.3864520 | -4.6526020 |
| H | 7.1372520  | -4.3442410 | -5.1290630 |
| C | 3.4493980  | -0.9367360 | -5.3255110 |
| H | 3.6923820  | -1.6375100 | -6.1173730 |
| C | 7.7931250  | -5.7248040 | -2.4919330 |
| H | 7.2594010  | -5.8643350 | -3.4263600 |
| C | 9.1372180  | -3.8221920 | -3.5363970 |
| H | 9.9967520  | -3.1962320 | -3.2936490 |
| H | 9.3750360  | -4.3840550 | -4.4441500 |
| C | 4.3667970  | -0.6745170 | -4.2846550 |
| C | 9.1857590  | -5.4773270 | -0.0840060 |
| H | 9.7498590  | -5.3804660 | 0.8390090  |
| C | -3.4444820 | 1.9749490  | 4.7459700  |
| N | -6.8538220 | 4.5466710  | 4.4977740  |
| C | -1.2616340 | 0.1811270  | 4.5852110  |
| C | -8.0450070 | 5.4290130  | 4.2395200  |
| H | -8.9007120 | 4.9798990  | 4.7468160  |

|   |            |            |            |
|---|------------|------------|------------|
| H | -7.8444020 | 6.3953390  | 4.7073160  |
| C | -3.3758270 | 0.8502650  | 5.5939690  |
| H | -4.1567730 | 0.6629450  | 6.3241330  |
| C | -9.2018980 | 4.6742030  | 0.6756720  |
| H | -9.7409630 | 3.8868030  | 0.1642610  |
| C | -8.2882970 | 5.5666970  | 2.7478890  |
| C | 0.3681170  | 2.6896920  | -4.2080550 |
| N | -7.5297510 | 5.3799560  | -2.2318970 |
| C | -5.9251840 | 2.3950030  | 4.9774090  |
| H | -6.1022530 | 1.3535630  | 5.2044310  |
| C | -1.7675650 | 2.6919970  | -2.9155960 |
| H | -1.3307410 | 1.9303200  | -2.2803170 |
| C | -5.4248500 | 5.9310130  | -3.2298110 |
| H | -4.7516070 | 6.7004460  | -3.5850140 |
| C | -2.2901630 | -0.0273680 | 5.5232140  |
| H | -2.2540430 | -0.8926560 | 6.1755000  |
| C | -7.7558150 | 6.6551120  | 2.0331460  |
| H | -7.2281240 | 7.4493390  | 2.5538060  |
| C | -4.6176710 | 2.8704380  | 4.7294400  |
| C | -3.0703580 | 3.1247310  | -2.6890260 |
| H | -3.6229220 | 2.7023130  | -1.8568130 |
| C | -5.0225030 | 4.5746420  | -3.1815110 |
| C | -8.6447520 | 5.7437260  | -0.0417510 |
| C | -1.0007780 | 3.2413180  | -3.9607240 |
| C | -1.5467240 | 4.2905130  | -4.7225520 |
| H | -0.9583480 | 4.7424400  | -5.5142020 |
| C | -2.3812570 | 2.2154750  | 3.8514170  |
| H | -2.4053760 | 3.0465370  | 3.1545960  |
| C | -1.3088540 | 1.3298980  | 3.7725120  |
| H | -0.5257290 | 1.5134990  | 3.0444700  |
| C | -5.9848150 | 3.6425800  | -2.7380470 |
| H | -5.7768010 | 2.5806710  | -2.7479300 |
| C | -7.2095860 | 4.0574410  | -2.2365160 |

|   |            |            |            |
|---|------------|------------|------------|
| H | -7.8875020 | 3.3455710  | -1.7514130 |
| C | -7.0149460 | 3.2425270  | 4.8579210  |
| H | -8.0282200 | 2.9008310  | 5.0201330  |
| C | -4.4873720 | 4.2394630  | 4.3963970  |
| H | -3.5136600 | 4.6821180  | 4.2355330  |
| C | -5.6057730 | 5.0446090  | 4.2814300  |
| H | -5.5369000 | 6.0908040  | 4.0170390  |
| C | -6.6732500 | 6.3033620  | -2.7582140 |
| H | -7.0033710 | 7.3336600  | -2.7597700 |
| C | -2.8543070 | 4.7366060  | -4.4892210 |
| H | -3.2670040 | 5.5197900  | -5.1181500 |
| C | -7.9343350 | 6.7423220  | 0.6479790  |
| H | -7.5329160 | 7.5986800  | 0.1133640  |
| C | -8.7975430 | 5.8101270  | -1.5520730 |
| H | -9.5955390 | 5.1497510  | -1.8950990 |
| H | -9.0242190 | 6.8238210  | -1.8893130 |
| C | -3.6416050 | 4.1400640  | -3.4838290 |
| C | -9.0256980 | 4.5902870  | 2.0618390  |
| H | -9.4784270 | 3.7619580  | 2.5991220  |
| C | 4.0027940  | 4.7603840  | -3.2904780 |
| N | 7.7971640  | 5.9021900  | -1.6936550 |
| C | 1.5405720  | 3.5882640  | -3.9883770 |
| C | 9.0992120  | 6.3153350  | -1.0522780 |
| H | 9.9089080  | 5.8465160  | -1.6159760 |
| H | 9.1798810  | 7.3994930  | -1.1612730 |
| C | 3.7916160  | 4.2964670  | -4.5989800 |
| H | 4.5953990  | 4.3314530  | -5.3268860 |
| C | 9.8536340  | 4.3515510  | 2.1255880  |
| H | 10.4671510 | 3.5067040  | 2.4181660  |
| C | 9.1249040  | 5.8929210  | 0.3999670  |
| C | -0.1364690 | -0.7858380 | 4.3750860  |
| N | 7.3689670  | 3.4860520  | 4.3806390  |
| C | 6.0512200  | 4.2944700  | -1.9499640 |

|   |           |            |            |
|---|-----------|------------|------------|
| H | 5.7026050 | 3.2899510  | -1.7092150 |
| C | 2.1998930 | -0.3474440 | 3.4302780  |
| H | 2.0162700 | -1.0363450 | 2.6133350  |
| C | 5.5067620 | 2.6511070  | 5.6385340  |
| H | 5.0260280 | 2.5691620  | 6.6044390  |
| C | 2.5688840 | 3.7038700  | -4.9394490 |
| H | 2.4371960 | 3.2701060  | -5.9248940 |
| C | 8.2279480 | 6.4805280  | 1.3132610  |
| H | 7.6003780 | 7.3114340  | 1.0032630  |
| C | 5.3544350 | 5.1632950  | -2.8088460 |
| C | 3.4192090 | 0.3303680  | 3.4751140  |
| H | 4.1530020 | 0.1152210  | 2.7063540  |
| C | 4.9677920 | 2.0318370  | 4.4827680  |
| C | 8.9138090 | 4.8867980  | 3.0115000  |
| C | 1.2189370 | -0.1413480 | 4.4203420  |
| C | 1.5068210 | 0.7764350  | 5.4520100  |
| H | 0.7655070 | 0.9657240  | 6.2213680  |
| C | 2.9387080 | 4.7406240  | -2.3693980 |
| H | 3.0879090 | 5.1242870  | -1.3649220 |
| C | 1.7067230 | 4.1858600  | -2.7252510 |
| H | 0.9071460 | 4.1297930  | -1.9934960 |
| C | 5.6988540 | 2.1847270  | 3.2911440  |
| H | 5.3980960 | 1.7253790  | 2.3602350  |
| C | 6.8951890 | 2.8917530  | 3.2508630  |
| H | 7.4501180 | 2.9563500  | 2.3010250  |
| C | 7.2633960 | 4.6870170  | -1.3886320 |
| H | 7.7644010 | 4.0231430  | -0.6686010 |
| C | 5.9579000 | 6.3948310  | -3.1413790 |
| H | 5.4718140 | 7.0899770  | -3.8137850 |
| C | 7.1758290 | 6.7398920  | -2.5730750 |
| H | 7.6652360 | 7.6806420  | -2.7883700 |
| C | 6.6881290 | 3.3680290  | 5.5592220  |
| H | 7.1216490 | 3.8507400  | 6.4254190  |



|   |             |            |            |
|---|-------------|------------|------------|
| C | 2.7216680   | 1.4651570  | 5.4926920  |
| H | 2.8821790   | 2.1849790  | 6.2885980  |
| C | 8.1226000   | 5.9807760  | 2.6100850  |
| H | 7.4146860   | 6.4253570  | 3.3039560  |
| C | 8.6775300   | 4.2421820  | 4.3566790  |
| H | 9.4694300   | 3.5284340  | 4.5967240  |
| H | 8.6248900   | 4.9864580  | 5.1552750  |
| C | 3.6978790   | 1.2625060  | 4.4963020  |
| C | 9.9591870   | 4.8536930  | 0.8213880  |
| H | 10.6494370  | 4.3863820  | 0.1280850  |
| C | -3.0123830  | -1.0512400 | -4.8681100 |
| N | -6.6493450  | -3.2985350 | -4.8224370 |
| C | -0.6435200  | 0.4730340  | -4.6731950 |
| C | -7.9218120  | -4.1082300 | -4.8027980 |
| H | -8.7473740  | -3.4223410 | -5.0077490 |
| H | -7.8506420  | -4.8231840 | -5.6270900 |
| C | -2.7002010  | -0.0956270 | -5.8525640 |
| H | -3.3861810  | 0.0862000  | -6.6744270 |
| C | -9.3893640  | -5.0832700 | -1.4205920 |
| H | -10.2119650 | -4.7664200 | -0.7928250 |
| C | -8.1279680  | -4.8120880 | -3.4802080 |
| C | -0.3570120  | -2.0995790 | 4.0723150  |
| N | -7.4875830  | -5.9435620 | 1.3187340  |
| C | -5.0593660  | -1.9188410 | -3.7181960 |
| H | -4.7742890  | -1.4220040 | -2.7996160 |
| C | -2.7359120  | -2.0227660 | 3.1495210  |
| H | -2.5843290  | -1.0092540 | 2.7973940  |
| C | -5.3898170  | -6.0911260 | 2.4519330  |
| H | -4.5653990  | -6.7187040 | 2.7631570  |
| C | -1.5328130  | 0.6710420  | -5.7443590 |
| H | -1.3222740  | 1.4404510  | -6.4799540 |
| C | -7.2049530  | -5.7785070 | -3.0351090 |
| H | -6.3621140  | -6.0592070 | -3.6611450 |

|   |            |            |            |
|---|------------|------------|------------|
| C | -4.2905760 | -1.8038050 | -4.8875500 |
| C | -3.9464360 | -2.6513520 | 2.8635790  |
| H | -4.6965580 | -2.0979090 | 2.3153420  |
| C | -5.3721960 | -4.6890380 | 2.6561880  |
| C | -8.4495470 | -6.0109480 | -0.9594030 |
| C | -1.7139630 | -2.6993860 | 3.8426470  |
| C | -1.9719750 | -4.0242100 | 4.2563670  |
| H | -1.2162910 | -4.5686470 | 4.8130980  |
| C | -2.1016120 | -1.2759540 | -3.8173300 |
| H | -2.3014740 | -2.0302440 | -3.0633040 |
| C | -0.9189060 | -0.5402460 | -3.7385280 |
| H | -0.2322890 | -0.7202880 | -2.9189690 |
| C | -6.4962670 | -3.9688160 | 2.2112740  |
| H | -6.5925570 | -2.8917680 | 2.2953600  |
| C | -7.5378690 | -4.6035540 | 1.5420880  |
| H | -8.3826110 | -4.0190750 | 1.1246500  |
| C | -6.2345360 | -2.6667650 | -3.6918960 |
| H | -6.8120940 | -2.7095620 | -2.7418460 |
| C | -4.7817720 | -2.4406640 | -6.0517680 |
| H | -4.2382920 | -2.3913210 | -6.9867660 |
| C | -5.9499600 | -3.1809430 | -5.9903690 |
| H | -6.3453990 | -3.7009370 | -6.8531440 |
| C | -6.4460180 | -6.6881980 | 1.7844910  |
| H | -6.4739710 | -7.7517270 | 1.5882900  |
| C | -3.1721350 | -4.6670850 | 3.9353650  |
| H | -3.3176850 | -5.6903620 | 4.2657800  |
| C | -7.3633660 | -6.3692670 | -1.7814160 |
| H | -6.6397170 | -7.1059960 | -1.4414590 |
| C | -8.5526090 | -6.5578190 | 0.4523500  |
| H | -9.5193650 | -6.3137510 | 0.8959910  |
| H | -8.4151910 | -7.6412640 | 0.4856510  |
| C | -4.1712170 | -3.9989850 | 3.1993520  |
| C | -9.2235900 | -4.4834290 | -2.6769380 |

|   |            |            |            |
|---|------------|------------|------------|
| H | -9.9336340 | -3.7266510 | -2.9938270 |
| C | 4.5013540  | -2.8799010 | 0.4167120  |
| O | 5.1644540  | -2.3909340 | 1.6115040  |
| C | 5.6218260  | -3.1817020 | -0.5985400 |
| C | 6.5727200  | -2.0821930 | 1.2994050  |
| C | 6.6548790  | -2.1179690 | -0.2348150 |
| H | 5.2677320  | -3.1181130 | -1.6288350 |
| H | 6.0260500  | -4.1857230 | -0.4204390 |
| C | 7.0198680  | -0.7585050 | 1.9140790  |
| H | 7.1973100  | -2.8961740 | 1.6943980  |
| O | 7.9966380  | -2.3531220 | -0.6503760 |
| H | 6.3062630  | -1.1641230 | -0.6488240 |
| O | 6.4868820  | 0.3652620  | 1.1888890  |
| H | 6.6613820  | -0.6832930 | 2.9467430  |
| H | 8.1163360  | -0.7327010 | 1.9078620  |
| H | 8.4262340  | -1.4192630 | -0.5885960 |
| P | 7.3945520  | 1.1597740  | -0.1362730 |
| O | 7.8482970  | 2.5663150  | 0.5075250  |
| O | 8.5668870  | 0.1000310  | -0.4959220 |
| O | 6.2328950  | 1.2758830  | -1.2641850 |
| H | 3.9166240  | -3.7648850 | 0.6554680  |
| C | -5.0067350 | 1.8192960  | 1.4540510  |
| O | -5.8996820 | 1.1190500  | 2.3376060  |
| C | -5.9016760 | 2.5539500  | 0.4448720  |
| C | -7.2750840 | 1.1608210  | 1.7798100  |
| C | -7.0532820 | 1.5525780  | 0.3007990  |
| H | -5.3592150 | 2.7636980  | -0.4735940 |
| H | -6.2629300 | 3.4998080  | 0.8675870  |
| C | -7.9551130 | -0.1750560 | 2.0272030  |
| H | -7.8244700 | 1.9689770  | 2.2860480  |
| O | -8.2309480 | 2.0084880  | -0.3583320 |
| H | -6.6858450 | 0.6700060  | -0.2364080 |
| O | -7.3700190 | -1.1851320 | 1.1887180  |

|   |            |            |            |
|---|------------|------------|------------|
| H | -7.8171930 | -0.4716790 | 3.0728850  |
| H | -9.0294500 | -0.0723680 | 1.8290550  |
| H | -8.7002740 | 1.0977550  | -0.6276930 |
| P | -8.3177770 | -1.6849680 | -0.2691610 |
| O | -9.3450130 | -2.7714130 | 0.3127160  |
| O | -8.9561060 | -0.2965080 | -0.7986970 |
| O | -7.0967090 | -2.2547780 | -1.1612240 |
| H | -4.3709790 | 2.4952450  | 2.0214560  |
| N | -4.0872840 | 0.8484800  | 0.7994760  |
| C | -4.4921970 | -0.4366090 | 0.4486600  |
| C | -2.8094690 | 1.3148530  | 0.5064310  |
| H | -5.5170340 | -0.7161870 | 0.6997150  |
| C | -3.6494650 | -1.3430960 | -0.1270140 |
| N | -1.9531020 | 0.3732990  | -0.0280080 |
| O | -2.4649550 | 2.5043460  | 0.7116850  |
| C | -4.0754650 | -2.7476760 | -0.4578270 |
| C | -2.2670900 | -0.9507550 | -0.3240610 |
| H | -0.9776660 | 0.6781600  | -0.2430760 |
| H | -5.1687030 | -2.8001740 | -0.5525600 |
| H | -3.6192340 | -3.0785860 | -1.3966630 |
| H | -3.7297720 | -3.4476950 | 0.3124700  |
| O | -1.3615450 | -1.7335670 | -0.7339630 |
| N | 3.5182050  | -1.8542780 | -0.0055620 |
| C | 3.7996080  | -0.5071180 | 0.1495480  |
| C | 2.2608210  | -2.2930230 | -0.4184510 |
| H | 4.8010980  | -0.2404710 | 0.4700450  |
| C | 2.8797470  | 0.4732570  | -0.0468390 |
| N | 1.3195330  | -1.2879390 | -0.5768830 |
| O | 2.0013320  | -3.5011920 | -0.6088850 |
| C | 3.2149180  | 1.9240630  | 0.1609980  |
| C | 1.5434930  | 0.0775730  | -0.4281730 |
| H | 0.3355640  | -1.5790740 | -0.7529360 |
| H | 4.2743040  | 2.0909030  | -0.0607580 |

|   |           |           |            |
|---|-----------|-----------|------------|
| H | 2.6067700 | 2.5545190 | -0.4929460 |
| H | 3.0029600 | 2.2332220 | 1.1928930  |
| O | 0.5954990 | 0.8977160 | -0.6186440 |

**$PP_{cage} \rightarrow AA2$**

|   | X           | Y          | Z          |
|---|-------------|------------|------------|
| C | -3.2146390  | 5.2317510  | 2.1456620  |
| N | -6.8039210  | 6.8278950  | 0.4400730  |
| C | -0.8383660  | 3.9595960  | 3.0434960  |
| C | -8.0390590  | 7.2355600  | -0.3189420 |
| H | -8.8382890  | 7.4096990  | 0.4045580  |
| H | -7.8131960  | 8.1869320  | -0.8065940 |
| C | -3.1234610  | 4.7203080  | 3.4565040  |
| H | -3.9569830  | 4.8220260  | 4.1445400  |
| C | -9.9847650  | 4.4791760  | -2.1216130 |
| H | -10.9376920 | 3.9750300  | -2.0154590 |
| C | -8.4205890  | 6.1580780  | -1.3193870 |
| C | -0.5077060  | -1.9243290 | -4.2339390 |
| N | -8.2396350  | 1.8896610  | -4.1303900 |
| C | -5.7405160  | 5.3308800  | 1.9774410  |
| H | -5.8525330  | 4.5111100  | 2.6769820  |
| C | -2.8073940  | -1.5381430 | -3.2245190 |
| H | -2.5200220  | -2.1267320 | -2.3636250 |
| C | -6.1298220  | 1.5406950  | -5.2030160 |
| H | -5.4252540  | 1.8814780  | -5.9487550 |
| C | -1.9482180  | 4.1066890  | 3.9002520  |
| H | -1.8970060  | 3.7317350  | 4.9155300  |
| C | -7.5065390  | 5.7471240  | -2.3021580 |
| H | -6.5401550  | 6.2352330  | -2.4000910 |
| C | -4.4627170  | 5.8259430  | 1.6211720  |
| C | -4.0805930  | -0.9746680 | -3.2612280 |
| H | -4.7299540  | -1.1275410 | -2.4063440 |
| C | -5.8335700  | 0.4528930  | -4.3421270 |

|   |             |            |            |
|---|-------------|------------|------------|
| C | -9.0481770  | 4.0191960  | -3.0592180 |
| C | -1.8929220  | -1.3529840 | -4.2793000 |
| C | -2.3068340  | -0.5743990 | -5.3773840 |
| H | -1.6262510  | -0.4104630 | -6.2065700 |
| C | -2.0851960  | 5.1384660  | 1.3075430  |
| H | -2.1335300  | 5.4911830  | 0.2826850  |
| C | -0.9182380  | 4.5194470  | 1.7527680  |
| H | -0.0659600  | 4.4432050  | 1.0862330  |
| C | -6.8591980  | 0.0595210  | -3.4555110 |
| H | -6.7847540  | -0.8065660 | -2.8062840 |
| C | -8.0454070  | 0.7850740  | -3.3565430 |
| H | -8.8063940  | 0.4572060  | -2.6325430 |
| C | -6.8805840  | 5.8349910  | 1.3698720  |
| H | -7.8668140  | 5.4412320  | 1.5775620  |
| C | -4.4283300  | 6.8915710  | 0.6916430  |
| H | -3.4922060  | 7.3604550  | 0.4192750  |
| C | -5.5966740  | 7.3691070  | 0.1212130  |
| H | -5.5974680  | 8.1790690  | -0.5957610 |
| C | -7.3224250  | 2.2250250  | -5.0855730 |
| H | -7.5731070  | 3.0558630  | -5.7316680 |
| C | -3.5902270  | -0.0193880 | -5.4239490 |
| H | -3.8715500  | 0.5401780  | -6.3093700 |
| C | -7.8183680  | 4.6887990  | -3.1621920 |
| H | -7.0690460  | 4.3869430  | -3.8853030 |
| C | -9.4053390  | 2.7947640  | -3.9029590 |
| H | -10.1752250 | 2.2143160  | -3.3946040 |
| H | -9.7894980  | 3.0895280  | -4.8848010 |
| C | -4.5004560  | -0.2003270 | -4.3603060 |
| C | -9.6758750  | 5.5350130  | -1.2569120 |
| H | -10.4092800 | 5.8448610  | -0.5187330 |
| C | 3.6240920   | -0.7533220 | 4.6966990  |
| N | 6.9320690   | -3.4809210 | 4.8045720  |
| C | 1.4531740   | 1.0349900  | 4.2605900  |

|   |            |            |            |
|---|------------|------------|------------|
| C | 8.0725120  | -4.4451210 | 4.6323760  |
| H | 8.9574560  | -3.9850250 | 5.0745490  |
| H | 7.8291820  | -5.3315840 | 5.2241310  |
| C | 3.6675890  | 0.5724600  | 5.1792050  |
| H | 4.5272240  | 0.9264320  | 5.7391010  |
| C | 9.7041700  | -4.6861770 | 1.1635960  |
| H | 10.5796210 | -4.2845600 | 0.6636320  |
| C | 8.3298570  | -4.8225700 | 3.1770550  |
| C | -0.2137320 | -3.1973860 | -3.8265670 |
| N | 7.8156420  | -5.5008580 | -1.8159740 |
| C | 6.1003440  | -1.2373280 | 4.9127830  |
| H | 6.3423090  | -0.1836580 | 4.9119910  |
| C | 2.0539610  | -2.8667020 | -2.7603570 |
| H | 1.6794850  | -1.9680070 | -2.2872040 |
| C | 5.6334910  | -6.1684560 | -2.5447420 |
| H | 4.9093880  | -6.9647940 | -2.6586090 |
| C | 2.5966040  | 1.4485570  | 4.9735700  |
| H | 2.6550250  | 2.4610590  | 5.3561520  |
| C | 7.4631400  | -5.6943800 | 2.4907980  |
| H | 6.6042510  | -6.1284840 | 2.9935660  |
| C | 4.7661490  | -1.6844340 | 4.8308390  |
| C | 3.3804920  | -3.2402330 | -2.5514950 |
| H | 4.0050110  | -2.6237410 | -1.9112100 |
| C | 5.2873130  | -4.8224730 | -2.8177040 |
| C | 8.8134650  | -5.5161500 | 0.4678600  |
| C | 1.1967560  | -3.6413370 | -3.5672060 |
| C | 1.6969030  | -4.8433620 | -4.1050140 |
| H | 1.0512820  | -5.4682370 | -4.7132840 |
| C | 2.4597410  | -1.1766490 | 4.0239520  |
| H | 2.3911290  | -2.1793050 | 3.6157210  |
| C | 1.3977940  | -0.3009080 | 3.8128940  |
| H | 0.5287090  | -0.6506000 | 3.2662170  |
| C | 6.3195160  | -3.8672200 | -2.7012270 |

|   |            |            |            |
|---|------------|------------|------------|
| H | 6.1583650  | -2.8290340 | -2.9610830 |
| C | 7.5641770  | -4.2143000 | -2.1884110 |
| H | 8.3189000  | -3.4459300 | -2.0038880 |
| C | 7.1550960  | -2.1415300 | 4.8854260  |
| H | 8.1823280  | -1.8118990 | 4.8752750  |
| C | 4.5710850  | -3.0909090 | 4.8246160  |
| H | 3.5778180  | -3.5170240 | 4.8363980  |
| C | 5.6485360  | -3.9524530 | 4.8141350  |
| H | 5.5226260  | -5.0259670 | 4.8168200  |
| C | 6.8869400  | -6.4772940 | -2.0472750 |
| H | 7.1688890  | -7.4898290 | -1.7902750 |
| C | 3.0247090  | -5.2329260 | -3.8842660 |
| H | 3.3879990  | -6.1478050 | -4.3428020 |
| C | 7.7006270  | -6.0357840 | 1.1557000  |
| H | 7.0067120  | -6.7085840 | 0.6616430  |
| C | 9.0399210  | -5.8225890 | -1.0115760 |
| H | 9.8695770  | -5.2346350 | -1.4075140 |
| H | 9.2693920  | -6.8795590 | -1.1694510 |
| C | 3.8918630  | -4.4262690 | -3.1188740 |
| C | 9.4635730  | -4.3443640 | 2.5046890  |
| H | 10.1646290 | -3.6922170 | 3.0155850  |
| C | -3.6635430 | -5.3690790 | -2.5340080 |
| N | -7.3920850 | -6.2599910 | -0.6596140 |
| C | -1.3098450 | -4.1521610 | -3.4861480 |
| C | -8.6624280 | -6.5270570 | 0.1019660  |
| H | -9.4969340 | -6.1969860 | -0.5190530 |
| H | -8.7370730 | -7.6078060 | 0.2423180  |
| C | -3.5879440 | -4.9228510 | -3.8640940 |
| H | -4.4567670 | -4.9927980 | -4.5098030 |
| C | -9.3680390 | -3.8931800 | 2.7556930  |
| H | -9.9960730 | -3.0099290 | 2.8122590  |
| C | -8.6384230 | -5.7785730 | 1.4169880  |
| C | 0.2911070  | 1.9282150  | 3.9424290  |



|   |            |            |            |
|---|------------|------------|------------|
| N | -7.0528360 | -2.4897000 | 4.8565000  |
| C | -5.8885910 | -4.7045910 | -1.6405440 |
| H | -5.6715760 | -3.6697770 | -1.8698880 |
| C | -1.8657880 | 0.9596500  | 3.0393150  |
| H | -1.5542790 | 1.2603420  | 2.0441590  |
| C | -4.9300620 | -1.8129450 | 5.7235930  |
| H | -4.1721970 | -1.9502830 | 6.4832250  |
| C | -2.4113620 | -4.3372530 | -4.3406170 |
| H | -2.3764980 | -3.9503670 | -5.3528800 |
| C | -7.7343950 | -6.1476000 | 2.4349430  |
| H | -7.1084300 | -7.0289350 | 2.3198290  |
| C | -4.9751760 | -5.7316510 | -1.9275420 |
| C | -3.0689490 | 0.2750710  | 3.2179230  |
| H | -3.6634410 | 0.0145920  | 2.3524980  |
| C | -4.7444020 | -0.9110690 | 4.6504020  |
| C | -8.4482690 | -4.2347920 | 3.7501720  |
| C | -1.0382040 | 1.2539970  | 4.1369890  |
| C | -1.4500870 | 0.8422840  | 5.4181850  |
| H | -0.8221620 | 1.0566160  | 6.2768850  |
| C | -2.5109370 | -5.3352690 | -1.7279050 |
| H | -2.5505590 | -5.7199050 | -0.7134450 |
| C | -1.3415070 | -4.7322110 | -2.2038260 |
| H | -0.4743770 | -4.6464540 | -1.5557100 |
| C | -5.7892280 | -0.8243650 | 3.7048820  |
| H | -5.7670780 | -0.1144920 | 2.8873770  |
| C | -6.9092320 | -1.6402100 | 3.8020500  |
| H | -7.6680210 | -1.6228170 | 3.0172800  |
| C | -7.0922900 | -4.9747300 | -0.9930290 |
| H | -7.7490590 | -4.1164950 | -0.7254850 |
| C | -5.3257320 | -7.0498530 | -1.5704150 |
| H | -4.6659960 | -7.8813190 | -1.7817240 |
| C | -6.5415070 | -7.2861660 | -0.9466300 |
| H | -6.8579100 | -8.2807360 | -0.6619970 |

|   |             |            |            |
|---|-------------|------------|------------|
| C | -6.0868460  | -2.5698530 | 5.8116120  |
| H | -6.2591350  | -3.2586120 | 6.6276730  |
| C | -2.6633840  | 0.1709220  | 5.6005370  |
| H | -2.9641830  | -0.0957020 | 6.6086020  |
| C | -7.6391620  | -5.3799240 | 3.5955120  |
| H | -6.9429710  | -5.6698530 | 4.3785100  |
| C | -8.2943420  | -3.3427070 | 4.9596420  |
| H | -9.1449370  | -2.6643540 | 5.0539400  |
| H | -8.2063640  | -3.9177230 | 5.8840270  |
| C | -3.4897040  | -0.1324670 | 4.4987000  |
| C | -9.4627480  | -4.6657130 | 1.5892580  |
| H | -10.1525250 | -4.3257390 | 0.8249820  |
| C | 3.0266800   | 0.4796830  | -4.6501940 |
| N | 6.9819530   | 2.0610850  | -4.2771260 |
| C | 0.6138470   | -0.9816350 | -4.5398490 |
| C | 8.4072380   | 2.4884970  | -4.1142460 |
| H | 8.8819430   | 1.7542140  | -3.4478350 |
| H | 8.8732680   | 2.4591200  | -5.1030030 |
| C | 2.7836380   | -0.5677150 | -5.5597310 |
| H | 3.5505570   | -0.8718530 | -6.2647420 |
| C | 9.7490510   | 5.2461780  | -1.8948690 |
| H | 10.5793080  | 5.3493520  | -1.2069420 |
| C | 8.5371580   | 3.8535910  | -3.4672280 |
| C | 0.3943150   | 3.1833060  | 3.4131170  |
| N | 7.4991330   | 6.7412050  | 0.1555500  |
| C | 4.8917820   | 1.4815430  | -3.3015170 |
| H | 4.3166180   | 1.3773400  | -2.3897370 |
| C | 2.6642890   | 3.0977680  | 2.2969690  |
| H | 2.5270770   | 2.0421040  | 2.1058940  |
| C | 5.2982250   | 7.0308950  | 1.0397880  |
| H | 4.4285420   | 7.6673660  | 1.1419530  |
| C | 1.5901260   | -1.2928150 | -5.5011950 |
| H | 1.4444940   | -2.1450000 | -6.1563880 |

|   |           |           |            |
|---|-----------|-----------|------------|
| C | 7.5396800 | 4.8424750 | -3.5673280 |
| H | 6.6792970 | 4.7009810 | -4.2152260 |
| C | 4.3741320 | 1.0907610 | -4.5499210 |
| C | 3.8342350 | 3.7037910 | 1.8355010  |
| H | 4.5323120 | 3.0988890 | 1.2625410  |
| C | 5.2949950 | 5.6978900 | 1.5163340  |
| C | 8.6977510 | 6.1662960 | -1.8903870 |
| C | 1.6903390 | 3.8216830 | 3.0074850  |
| C | 1.9348650 | 5.1874190 | 3.2596950  |
| H | 1.2072640 | 5.7736550 | 3.8122060  |
| C | 1.9956850 | 0.8623940 | -3.7681100 |
| H | 2.1404570 | 1.7010760 | -3.0948290 |
| C | 0.7938870 | 0.1536310 | -3.7272650 |
| H | 0.0325930 | 0.4231200 | -3.0011010 |
| C | 6.4744960 | 4.9534780 | 1.3514670  |
| H | 6.5604210 | 3.9284250 | 1.6834910  |
| C | 7.5642350 | 5.4817370 | 0.6657740  |
| H | 8.4435370 | 4.8423540 | 0.4688340  |
| C | 6.1889080 | 1.9712590 | -3.1729600 |
| H | 6.5728950 | 2.2670770 | -2.1671580 |
| C | 5.2184220 | 1.2448040 | -5.6740840 |
| H | 4.8759360 | 1.0074190 | -6.6730250 |
| C | 6.5075000 | 1.7226400 | -5.5092510 |
| H | 7.1837720 | 1.8458140 | -6.3445420 |
| C | 6.4010290 | 7.5231070 | 0.3623210  |
| H | 6.4231180 | 8.5217770 | -0.0526550 |
| C | 3.1099080 | 5.8017440 | 2.8075330  |
| H | 3.2803450 | 6.8477770 | 3.0434420  |
| C | 7.6177030 | 5.9890970 | -2.7769060 |
| H | 6.8137460 | 6.7201320 | -2.8113760 |
| C | 8.5960600 | 7.1931490 | -0.7808490 |
| H | 9.5237650 | 7.2610220 | -0.2098190 |
| H | 8.3261440 | 8.1888860 | -1.1398330 |

|   |             |            |            |
|---|-------------|------------|------------|
| C | 4.0704310   | 5.0709560  | 2.0789870  |
| C | 9.6658300   | 4.0894060  | -2.6794620 |
| H | 10.4304110  | 3.3292960  | -2.5725430 |
| C | -5.7004280  | 2.2830160  | 0.5821350  |
| O | -6.5147960  | 1.9585780  | 1.7353610  |
| C | -6.6641860  | 2.7572060  | -0.5135220 |
| C | -7.9340790  | 1.8453570  | 1.3011680  |
| C | -7.8519260  | 1.8467640  | -0.2288100 |
| H | -6.2402870  | 2.6322040  | -1.5115980 |
| H | -6.9285160  | 3.8090120  | -0.3715520 |
| C | -8.6179170  | 0.6029340  | 1.8617910  |
| H | -8.4634690  | 2.7422170  | 1.6483200  |
| O | -9.0982290  | 2.1866500  | -0.8145670 |
| H | -7.5765100  | 0.8348460  | -0.5459300 |
| O | -8.1125850  | -0.6007920 | 1.2525890  |
| H | -8.4525460  | 0.5526750  | 2.9453980  |
| H | -9.6988460  | 0.7000900  | 1.6930950  |
| H | -9.5547280  | 1.2652030  | -0.8967920 |
| P | -9.1301920  | -1.4360460 | -0.0381500 |
| O | -10.3647270 | -2.0304230 | 0.7721750  |
| O | -9.4870360  | -0.2284730 | -1.0756310 |
| O | -7.9940630  | -2.4261360 | -0.6261460 |
| N | -4.9256580  | 1.0913390  | 0.1955970  |
| C | -3.5991980  | 1.1556180  | -0.1660460 |
| C | -5.2493560  | -0.2643340 | 0.3198300  |
| N | -2.8580290  | 2.2659740  | -0.4169720 |
| C | -3.1508630  | -0.1691790 | -0.1966510 |
| N | -4.1920780  | -1.0484480 | 0.0996960  |
| H | -6.2472400  | -0.6060590 | 0.5913380  |
| C | -1.5845360  | 1.9614630  | -0.6891910 |
| C | -1.7668810  | -0.3769890 | -0.3911320 |
| N | -1.0166020  | 0.7261110  | -0.6803370 |
| H | -0.9230050  | 2.7842390  | -0.9335980 |

|   |            |            |            |
|---|------------|------------|------------|
| N | -1.1822190 | -1.5865510 | -0.2698240 |
| H | -0.1526890 | -1.6773230 | -0.1900890 |
| H | -1.7737530 | -2.3676780 | -0.0229340 |
| H | -4.9583430 | 3.0318120  | 0.8659050  |
| C | 6.5301520  | -2.2165200 | 1.7096630  |
| O | 7.6948800  | -1.6275580 | 2.3078870  |
| C | 6.9219960  | -2.5409780 | 0.2693690  |
| C | 8.6618410  | -1.2340870 | 1.2402660  |
| C | 7.8380220  | -1.3595580 | -0.0586780 |
| H | 6.0457640  | -2.6206230 | -0.3730820 |
| H | 7.4722430  | -3.4797200 | 0.2561030  |
| C | 9.2183030  | 0.1488210  | 1.5407920  |
| H | 9.4693440  | -1.9741760 | 1.2332610  |
| O | 8.6438080  | -1.5239950 | -1.2262890 |
| H | 7.2278910  | -0.4566790 | -0.1747920 |
| O | 8.2222560  | 1.1426920  | 1.2627730  |
| H | 9.4971710  | 0.2228650  | 2.5963080  |
| H | 10.1167470 | 0.3058480  | 0.9312100  |
| H | 8.9125270  | -0.5552780 | -1.4533910 |
| P | 8.3957640  | 2.0986290  | -0.2204080 |
| O | 9.3810160  | 3.2951860  | 0.1839740  |
| O | 8.9335200  | 1.0220070  | -1.3359260 |
| O | 6.8535900  | 2.5165410  | -0.5090240 |
| N | 5.4156630  | -1.2563250 | 1.6971050  |
| C | 4.1423330  | -1.6017490 | 1.2872890  |
| C | 5.5077750  | 0.1366740  | 1.6148000  |
| N | 3.5718850  | -2.8353090 | 1.1778270  |
| C | 3.5223690  | -0.3944270 | 0.9732140  |
| N | 4.3723270  | 0.6804580  | 1.1917620  |
| H | 6.4404290  | 0.6681580  | 1.7892560  |
| C | 2.3141950  | -2.7705960 | 0.7082220  |
| C | 2.2301140  | -0.4367640 | 0.4119560  |
| N | 1.6262990  | -1.6609610 | 0.3172880  |

|   |           |            |            |
|---|-----------|------------|------------|
| H | 1.7881340 | -3.7121910 | 0.6041970  |
| N | 1.6350260 | 0.6806090  | -0.0416420 |
| H | 0.6543540 | 0.6788660  | -0.3927090 |
| H | 2.1494010 | 1.5468060  | 0.0407030  |
| H | 6.2135340 | -3.0929630 | 2.2763480  |

*PP<sub>cage</sub> ⇒ CCI*

|   | X          | Y          | Z          |
|---|------------|------------|------------|
| C | 4.2426700  | -2.8788350 | -0.4764000 |
| O | 4.9098040  | -2.9066320 | 0.8094110  |
| C | 5.3681130  | -2.8438970 | -1.5286050 |
| C | 6.3276270  | -2.5301780 | 0.6411260  |
| C | 6.4269910  | -2.0130680 | -0.8043570 |
| H | 5.0305490  | -2.4100790 | -2.4713670 |
| H | 5.7360850  | -3.8610560 | -1.7131470 |
| C | 6.7517810  | -1.5202640 | 1.7046830  |
| H | 6.9338140  | -3.4426820 | 0.7242990  |
| O | 7.7630080  | -2.0849730 | -1.2844230 |
| H | 6.1175700  | -0.9632270 | -0.8278810 |
| O | 6.3955330  | -0.1786330 | 1.3038910  |
| H | 6.2430770  | -1.7501440 | 2.6480970  |
| H | 7.8335560  | -1.5805510 | 1.8760590  |
| H | 8.1560340  | -1.1645320 | -0.9914580 |
| P | 7.7645800  | 0.8841520  | 0.8081180  |
| O | 8.8055680  | 0.6849200  | 2.0180290  |
| O | 8.2047220  | 0.2729950  | -0.6376380 |
| O | 7.0174960  | 2.3166350  | 0.7289700  |
| H | 3.6025370  | -3.7509160 | -0.5799560 |
| C | -5.4536160 | 1.8526140  | 0.3471410  |
| O | -6.7566050 | 1.2871110  | 0.3604770  |
| C | -5.4637260 | 2.8819210  | -0.7934170 |
| C | -7.4395640 | 1.4375140  | -0.9322340 |
| C | -6.5516680 | 2.3993520  | -1.7590770 |

|   |            |            |            |
|---|------------|------------|------------|
| H | -4.4924650 | 3.0078580  | -1.2688900 |
| H | -5.7891210 | 3.8410790  | -0.3846770 |
| C | -7.6592100 | 0.0977670  | -1.6505450 |
| H | -8.4164070 | 1.8760240  | -0.7151110 |
| O | -7.2733400 | 3.5695910  | -2.2385050 |
| H | -6.1110860 | 1.8702160  | -2.6162650 |
| O | -8.7068350 | -0.7116450 | -1.1358660 |
| H | -7.9512750 | 0.3337400  | -2.6858900 |
| H | -6.7052810 | -0.4513730 | -1.6842390 |
| H | -7.9624400 | 3.3162750  | -2.8798850 |
| P | -8.7061410 | -1.2471950 | 0.5672660  |
| O | -9.6405120 | -2.5497930 | 0.5476860  |
| O | -7.1318930 | -1.6221360 | 0.8429690  |
| O | -9.1869890 | 0.0558870  | 1.3965500  |
| H | -5.2619810 | 2.3078460  | 1.3199000  |
| N | 3.3261480  | -1.7127150 | -0.4937490 |
| C | 3.6964730  | -0.5112430 | 0.0652680  |
| C | 2.0013460  | -1.9153680 | -0.9588090 |
| H | 4.7164070  | -0.3943930 | 0.4326770  |
| C | 2.8028270  | 0.5031770  | 0.2225590  |
| N | 1.0939190  | -0.9044870 | -0.7486120 |
| O | 1.6872370  | -3.0019150 | -1.5104460 |
| H | 3.1091110  | 1.4327330  | 0.6820100  |
| C | 1.4392280  | 0.2572970  | -0.1554780 |
| N | 0.4668750  | 1.1597510  | 0.0822610  |
| H | -0.5352750 | 0.8717130  | -0.0331190 |
| H | 0.6820560  | 2.0036190  | 0.5916990  |
| N | -4.4320390 | 0.7779100  | 0.1451030  |
| C | -4.7945450 | -0.5359850 | -0.0254340 |
| C | -3.0753470 | 1.1444600  | 0.2523190  |
| H | -5.8481750 | -0.8442780 | 0.2057630  |
| C | -3.8399130 | -1.4654670 | -0.3405180 |
| N | -2.1289620 | 0.2219420  | -0.0959450 |

|   |            |            |            |
|---|------------|------------|------------|
| O | -2.7782510 | 2.2992610  | 0.6747310  |
| H | -4.1170760 | -2.5040560 | -0.4543930 |
| C | -2.4701580 | -1.0457370 | -0.4212600 |
| N | -1.4911990 | -1.8875240 | -0.8010150 |
| H | -0.5013030 | -1.5488420 | -0.8371390 |
| H | -1.6976950 | -2.8556230 | -0.9931870 |
| C | -2.9440160 | 0.4474680  | -4.4854650 |
| N | -6.4627090 | -1.9392090 | -5.0819030 |
| C | -0.5954150 | 1.9646510  | -3.9989700 |
| C | -7.6997070 | -2.7932100 | -5.3429460 |
| H | -8.5032170 | -2.0930590 | -5.5853970 |
| H | -7.4713010 | -3.3902700 | -6.2294860 |
| C | -2.7777020 | 1.7202060  | -5.0696690 |
| H | -3.5558000 | 2.1449950  | -5.6970240 |
| C | -9.2016860 | -3.9272680 | -2.0265020 |
| H | -9.7623820 | -3.4729290 | -1.2081240 |
| C | -8.0809850 | -3.6662880 | -4.1741470 |
| C | -0.3578660 | -3.2451380 | 3.3673740  |
| N | -7.8944080 | -5.8816240 | 0.2919070  |
| C | -4.8943010 | -0.3301300 | -5.9222840 |
| H | -4.5669130 | 0.2769040  | -6.7564950 |
| C | -2.7345030 | -2.9244920 | 2.5073800  |
| H | -2.5385020 | -1.8732400 | 2.3476680  |
| C | -5.7175160 | -6.5025130 | 1.0595120  |
| H | -4.9082060 | -7.2213270 | 1.0405090  |
| C | -1.6224630 | 2.4687830  | -4.8224150 |
| H | -1.5134670 | 3.4490980  | -5.2730300 |
| C | -7.6405710 | -5.0020240 | -4.1014680 |
| H | -7.0562410 | -5.4312510 | -4.9105210 |
| C | -4.1683320 | -0.3554930 | -4.7058850 |
| C | -3.9927110 | -3.4212500 | 2.1777440  |
| H | -4.7439700 | -2.7406700 | 1.7926080  |
| C | -5.5844490 | -5.2613060 | 1.7318060  |



|   |            |            |            |
|---|------------|------------|------------|
| C | -8.7372850 | -5.2501490 | -1.9414760 |
| C | -1.7269830 | -3.7646450 | 3.0193870  |
| C | -2.0288370 | -5.1376880 | 3.1498170  |
| H | -1.2785060 | -5.8161800 | 3.5432880  |
| C | -1.9097900 | -0.0594740 | -3.6722240 |
| H | -1.9840880 | -1.0481150 | -3.2318830 |
| C | -0.7492520 | 0.6800410  | -3.4413340 |
| H | 0.0261980  | 0.2564840  | -2.8093320 |
| C | -6.7029000 | -4.4104410 | 1.7340800  |
| H | -6.7032300 | -3.4381680 | 2.2081390  |
| C | -7.8452130 | -4.7250560 | 1.0043540  |
| H | -8.6790690 | -4.0004460 | 0.9121790  |
| C | -6.0193020 | -1.1234470 | -6.0822650 |
| C | -4.6680040 | -1.1999690 | -3.6925340 |
| H | -4.1986330 | -1.2400730 | -2.7181140 |
| C | -5.8026460 | -1.9725300 | -3.8957780 |
| H | -6.2123330 | -2.6110120 | -3.1248670 |
| C | -6.8703160 | -6.7833890 | 0.3460940  |
| H | -6.9925820 | -7.6996220 | -0.2158980 |
| C | -3.2791540 | -5.6498150 | 2.7735170  |
| H | -3.4703380 | -6.7119820 | 2.8927520  |
| C | -7.9712090 | -5.7898960 | -2.9916360 |
| H | -7.6397640 | -6.8240350 | -2.9545260 |
| C | -9.0211370 | -6.0614350 | -0.6844700 |
| H | -9.9336650 | -5.7155430 | -0.1970710 |
| H | -9.1161010 | -7.1284380 | -0.8973770 |
| C | -4.2821350 | -4.7950080 | 2.2756100  |
| C | -8.8724340 | -3.1433900 | -3.1389530 |
| H | -9.2254050 | -2.1165410 | -3.1569200 |
| C | 4.3340720  | 5.6636870  | -1.9235920 |
| N | 8.1193890  | 6.1751790  | -0.0021680 |
| C | 1.8238370  | 4.7701270  | -2.8389730 |
| C | 9.4097470  | 6.3764810  | 0.7758400  |

|   |            |            |            |
|---|------------|------------|------------|
| H | 10.2353890 | 6.2264030  | 0.0762510  |
| H | 9.4121390  | 7.4169270  | 1.1092390  |
| C | 4.1211650  | 5.4483020  | -3.2946760 |
| H | 4.9366390  | 5.5709880  | -3.9997180 |
| C | 10.0309430 | 3.1897560  | 2.7499340  |
| H | 10.4800870 | 2.2205750  | 2.5791380  |
| C | 9.4765480  | 5.4105050  | 1.9330050  |
| C | -0.1376340 | -2.0542740 | 4.0026490  |
| N | 7.5294840  | 1.7849720  | 4.8280560  |
| C | 6.2522040  | 4.8217800  | -0.6073780 |
| H | 5.7948200  | 3.8452790  | -0.5032150 |
| C | 2.1673900  | -1.3679270 | 3.1692910  |
| H | 1.9602180  | -1.8191360 | 2.2050650  |
| C | 5.8076330  | 0.5047230  | 5.8946680  |
| H | 5.4833250  | -0.0528580 | 6.7642660  |
| C | 2.8742340  | 4.9915440  | -3.7455140 |
| H | 2.7364330  | 4.7549420  | -4.7950080 |
| C | 8.7194700  | 5.6447970  | 3.0955850  |
| H | 8.2101110  | 6.5941670  | 3.2337050  |
| C | 5.6898880  | 5.8746330  | -1.3440630 |
| C | 3.3915630  | -0.7299100 | 3.3699870  |
| H | 4.1225450  | -0.7189750 | 2.5708520  |
| C | 5.0008480  | 0.5856640  | 4.7338270  |
| C | 9.2110930  | 3.3925090  | 3.8686140  |
| C | 1.2091510  | -1.4279260 | 4.1998180  |
| C | 1.5219400  | -0.8192770 | 5.4340160  |
| H | 0.7911330  | -0.8340560 | 6.2361820  |
| C | 3.2547050  | 5.5385490  | -1.0288900 |
| H | 3.4041050  | 5.7421080  | 0.0267720  |
| C | 2.0040470  | 5.1268060  | -1.4885680 |
| H | 1.1830770  | 5.0211060  | -0.7872610 |
| C | 5.5000330  | 1.3422920  | 3.6623270  |
| H | 4.9524490  | 1.4561900  | 2.7388790  |

|   |            |            |            |
|---|------------|------------|------------|
| C | 6.7619220  | 1.9229530  | 3.7206760  |
| C | 7.4645510  | 4.9863750  | 0.0505860  |
| C | 6.4239500  | 7.0774830  | -1.4379960 |
| H | 6.0482490  | 7.9196280  | -2.0047430 |
| C | 7.6247790  | 7.2040320  | -0.7528470 |
| H | 8.2027790  | 8.1189110  | -0.7706860 |
| C | 7.0585450  | 1.0998360  | 5.9115140  |
| H | 7.7182970  | 1.0247610  | 6.7659060  |
| C | 2.7543790  | -0.1865990 | 5.6405620  |
| H | 2.9562180  | 0.2855200  | 6.5973010  |
| C | 8.5957850  | 4.6429890  | 4.0632620  |
| H | 7.9960390  | 4.8254890  | 4.9506240  |
| C | 8.9672430  | 2.2418210  | 4.8182790  |
| H | 9.5495970  | 1.3749360  | 4.4987940  |
| H | 9.2219160  | 2.5066020  | 5.8485220  |
| C | 3.7010130  | -0.1213700 | 4.6004610  |
| C | 10.1702320 | 4.2010820  | 1.7920330  |
| H | 10.7676690 | 4.0134990  | 0.9053660  |
| C | -3.8064050 | 0.0436950  | 4.6854640  |
| N | -7.8231900 | 1.4189650  | 4.2734980  |
| C | -1.3077590 | -1.2197210 | 4.4285740  |
| C | -9.1836760 | 1.9962720  | 3.9902890  |
| H | -9.7398620 | 1.2336900  | 3.4365330  |
| H | -9.6734500 | 2.1964610  | 4.9452210  |
| C | -3.4731330 | -1.0334290 | 5.5231050  |
| H | -4.2048360 | -1.4271050 | 6.2209360  |
| C | -8.6864380 | 4.2525770  | 0.9643540  |
| H | -8.6110020 | 4.1511640  | -0.1163740 |
| C | -9.0179080 | 3.2533120  | 3.1511740  |
| C | 0.5798060  | 4.0235140  | -3.2065540 |
| N | -6.8639340 | 6.6263650  | 0.0625800  |
| C | -5.9367230 | 0.2479010  | 3.4301240  |
| H | -5.5239240 | -0.3508370 | 2.6288810  |

|   |            |            |            |
|---|------------|------------|------------|
| C | -1.2934400 | 4.0827430  | -1.5816700 |
| H | -0.8743280 | 3.1913180  | -1.1266910 |
| C | -4.5259610 | 6.2340340  | 0.3415610  |
| H | -3.6938180 | 6.0705470  | 1.0131050  |
| C | -2.2333250 | -1.6712980 | 5.3815580  |
| H | -2.0196000 | -2.5662090 | 5.9562270  |
| C | -8.8824440 | 4.5175610  | 3.7449170  |
| H | -8.9770830 | 4.6315740  | 4.8210490  |
| C | -5.2104950 | 0.5315420  | 4.5968400  |
| C | -2.4282030 | 4.6610790  | -1.0180270 |
| H | -2.8427990 | 4.1867930  | -0.1355930 |
| C | -4.3352420 | 6.2140790  | -1.0619060 |
| C | -8.5242530 | 5.5176790  | 1.5580390  |
| C | -0.7020990 | 4.6345500  | -2.7303400 |
| C | -1.2840010 | 5.7757090  | -3.3142040 |
| H | -0.8201040 | 6.2341480  | -4.1813770 |
| C | -2.8363980 | 0.5678880  | 3.8086270  |
| H | -3.0673160 | 1.4226080  | 3.1788120  |
| C | -1.5822510 | -0.0403330 | 3.7088680  |
| H | -0.8595060 | 0.3371570  | 2.9919560  |
| C | -5.4558300 | 6.4970750  | -1.8666970 |
| H | -5.3824420 | 6.4934600  | -2.9456770 |
| C | -6.7042020 | 6.6828110  | -1.2851840 |
| H | -7.5936750 | 6.8369460  | -1.8794750 |
| C | -7.2446400 | 0.6947890  | 3.2800180  |
| H | -7.8778680 | 0.4719450  | 2.3975570  |
| C | -5.8633410 | 1.2442510  | 5.6273420  |
| H | -5.3567900 | 1.4676620  | 6.5574100  |
| C | -7.1656720 | 1.6844980  | 5.4371140  |
| H | -7.7015120 | 2.2501350  | 6.1878690  |
| C | -5.7849440 | 6.4343690  | 0.8735880  |
| H | -5.9770550 | 6.4172690  | 1.9378470  |
| C | -2.4686990 | 6.3160550  | -2.7946540 |

|   |            |            |            |
|---|------------|------------|------------|
| H | -2.9137890 | 7.1840280  | -3.2719510 |
| C | -8.6393600 | 5.6491380  | 2.9510550  |
| H | -8.5571420 | 6.6258700  | 3.4197880  |
| C | -8.2314190 | 6.7280770  | 0.6919070  |
| H | -8.9499040 | 6.8156740  | -0.1255940 |
| H | -8.2592660 | 7.6527750  | 1.2735960  |
| C | -3.0468380 | 5.7645830  | -1.6335410 |
| C | -8.9451280 | 3.1256470  | 1.7509900  |
| H | -9.0900370 | 2.1351540  | 1.3147830  |
| C | 3.0036280  | -5.4191490 | 1.7367460  |
| N | 6.5331890  | -6.8954610 | -0.1853670 |
| C | 0.7768270  | -4.0777700 | 2.8582070  |
| C | 7.7775410  | -7.2623210 | -0.9482910 |
| H | 8.5564580  | -7.4840080 | -0.2162290 |
| H | 7.5611570  | -8.1808410 | -1.4978890 |
| C | 2.9446680  | -5.1550870 | 3.1211080  |
| H | 3.7516030  | -5.4670980 | 3.7764030  |
| C | 9.4208640  | -4.0779680 | -2.2800760 |
| H | 10.1073700 | -3.3213990 | -1.9205280 |
| C | 8.1857530  | -6.1332900 | -1.8762100 |
| C | 0.6407200  | 2.7543570  | -3.6970550 |
| N | 7.9519520  | -1.7658240 | -4.4073820 |
| C | 5.5014870  | -5.7509790 | 1.6439100  |
| H | 5.6284620  | -5.1653000 | 2.5432370  |
| C | 2.8435160  | 1.9124320  | -2.7829580 |
| H | 2.5995500  | 2.3710850  | -1.8325500 |
| C | 5.7404130  | -1.2611370 | -5.1626300 |
| H | 4.9132270  | -1.5295660 | -5.8056080 |
| C | 1.8411180  | -4.5030120 | 3.6752980  |
| H | 1.8146560  | -4.2964430 | 4.7393020  |
| C | 7.6227320  | -6.0314830 | -3.1605450 |
| H | 6.9544860  | -6.8038320 | -3.5313170 |
| C | 4.2124160  | -5.9808920 | 1.1077810  |

|   |           |            |            |
|---|-----------|------------|------------|
| C | 4.0475110 | 1.2206510  | -2.9152620 |
| H | 4.7068770 | 1.1466460  | -2.0558030 |
| C | 5.6443410 | -0.1759740 | -4.2529330 |
| C | 8.8244130 | -3.9467700 | -3.5407990 |
| C | 1.9400060 | 2.0196120  | -3.8566150 |
| C | 2.2723630 | 1.3897510  | -5.0696830 |
| H | 1.5916550 | 1.4525740  | -5.9123570 |
| C | 1.9028400 | -5.0578850 | 0.9329410  |
| H | 1.9113360 | -5.2081590 | -0.1412730 |
| C | 0.8097410 | -4.3967580 | 1.4879240  |
| H | 0.0007060 | -4.0755390 | 0.8415500  |
| C | 6.7769550 | 0.0953500  | -3.4638770 |
| H | 6.8213410 | 0.8985290  | -2.7390020 |
| C | 7.9079240 | -0.7150710 | -3.5477500 |
| H | 8.7759750 | -0.5058770 | -2.9400890 |
| C | 6.6301900 | -6.2105450 | 0.9889840  |
| H | 7.6278120 | -6.0286120 | 1.3651220  |
| C | 4.1503440 | -6.7242160 | -0.0951790 |
| H | 3.1999190 | -6.9783020 | -0.5445350 |
| C | 5.3084110 | -7.1598720 | -0.7162920 |
| H | 5.2876130 | -7.7267210 | -1.6370330 |
| C | 6.8863400 | -2.0252490 | -5.2209790 |
| H | 6.9856300 | -2.8541040 | -5.9072570 |
| C | 3.4790260 | 0.6973070  | -5.2088280 |
| H | 3.7174120 | 0.2601300  | -6.1729390 |
| C | 7.9476930 | -4.9513310 | -3.9874070 |
| H | 7.5243560 | -4.9137010 | -4.9866830 |
| C | 9.1088200 | -2.7226510 | -4.3992440 |
| H | 9.9795930 | -2.1798510 | -4.0294110 |
| H | 9.2999450 | -3.0015200 | -5.4390550 |
| C | 4.3865580 | 0.5997250  | -4.1329010 |
| C | 9.1093620 | -5.1652510 | -1.4559600 |
| H | 9.5867980 | -5.2442640 | -0.4837740 |

|   |            |            |            |
|---|------------|------------|------------|
| H | -6.5826240 | -1.1407320 | -7.0066080 |
| H | 7.8486120  | 4.1331030  | 0.6056180  |
| H | 7.1513210  | 2.4689670  | 2.8694940  |

***PP<sub>cage</sub>⇒(L)(phe-phe)<sub>2</sub>***

|   | X          | Y          | Z          |
|---|------------|------------|------------|
| C | 6.0056300  | -1.3975830 | 2.1428010  |
| H | 4.9776040  | -1.2354670 | 2.4523770  |
| C | 7.0331150  | -0.8828600 | 2.9481110  |
| H | 6.7816150  | -0.3406620 | 3.8544020  |
| C | 8.3776440  | -1.0818990 | 2.5974930  |
| H | 9.1724050  | -0.6901860 | 3.2225070  |
| C | 8.6852690  | -1.8016200 | 1.4300410  |
| H | 9.7212320  | -1.9600970 | 1.1487930  |
| C | 7.6547590  | -2.3115480 | 0.6282730  |
| H | 7.9055550  | -2.8910850 | -0.2587450 |
| C | 6.3057450  | -2.1111350 | 0.9714190  |
| C | 5.2326140  | -2.7254870 | 0.0923100  |
| H | 5.0715610  | -3.7683760 | 0.4018540  |
| H | 5.5935050  | -2.7582280 | -0.9424640 |
| C | 3.8608780  | -2.0414770 | 0.1189100  |
| H | 3.4437550  | -2.0766720 | 1.1348340  |
| C | 3.9053330  | -0.5471330 | -0.2728890 |
| C | 1.6125720  | -2.6996790 | -0.7495990 |
| C | 0.8696530  | -3.7670750 | -1.5561830 |
| H | 0.0265260  | -3.2593150 | -2.0382520 |
| C | 0.3033500  | -4.8414140 | -0.5649280 |
| H | 0.7221260  | -5.8177810 | -0.8297330 |
| H | 0.6551790  | -4.6253990 | 0.4508540  |
| C | -1.2143970 | -4.9112800 | -0.5483550 |
| C | -1.9630880 | -3.7657860 | -0.2167670 |
| H | -1.4433170 | -2.8421880 | 0.0303260  |
| C | -3.3620810 | -3.8104960 | -0.2027790 |

|   |            |            |            |
|---|------------|------------|------------|
| H | -3.9315080 | -2.9188620 | 0.0334640  |
| C | -4.0405000 | -5.0028850 | -0.5020720 |
| H | -5.1267570 | -5.0173560 | -0.5031580 |
| C | -3.2996760 | -6.1533010 | -0.8105290 |
| H | -3.8102510 | -7.0848100 | -1.0331350 |
| C | -1.8947520 | -6.1062120 | -0.8393020 |
| H | -1.3360010 | -7.0045970 | -1.0856860 |
| N | 2.9542920  | -2.7964590 | -0.7581620 |
| H | 3.3039580  | -3.5143670 | -1.3984160 |
| N | 1.7871450  | -4.3624820 | -2.5368520 |
| H | 1.8364660  | -3.8601940 | -3.4182730 |
| H | 1.6628180  | -5.3572180 | -2.6875890 |
| O | 4.9274110  | 0.0552170  | -0.6184970 |
| O | 2.7164020  | 0.0931320  | -0.1754920 |
| O | 0.9896350  | -1.7989530 | -0.0943960 |
| C | -6.7277040 | 0.5971900  | -2.8908700 |
| H | -6.0628780 | -0.1325870 | -2.4381240 |
| C | -6.2858170 | 1.2865800  | -4.0332830 |
| H | -5.2852020 | 1.1048680  | -4.4141840 |
| C | -7.1288380 | 2.1984070  | -4.6837130 |
| H | -6.7989210 | 2.7104580  | -5.5803450 |
| C | -8.4198610 | 2.4238630  | -4.1774120 |
| H | -9.0936960 | 3.1018350  | -4.6886090 |
| C | -8.8496020 | 1.7518470  | -3.0249190 |
| H | -9.8595210 | 1.9190380  | -2.6603270 |
| C | -8.0153200 | 0.8254330  | -2.3653500 |
| C | -8.6031330 | 0.0850320  | -1.1647510 |
| H | -9.1948020 | 0.7892100  | -0.5691310 |
| H | -9.3059100 | -0.6678600 | -1.5350990 |
| C | -7.6196240 | -0.6272340 | -0.2195550 |
| H | -8.1506110 | -0.8700530 | 0.7110520  |
| C | -7.1544020 | -1.9970740 | -0.7904950 |
| C | -5.4608810 | 0.0701360  | 0.9259970  |



|   |            |            |            |
|---|------------|------------|------------|
| C | -4.4268720 | 1.2037760  | 0.9266620  |
| H | -3.8197430 | 1.0109190  | 0.0296910  |
| C | -3.4551910 | 1.1665350  | 2.1300060  |
| H | -3.9623290 | 1.5592750  | 3.0196420  |
| H | -3.1891750 | 0.1278630  | 2.3428310  |
| C | -2.2273450 | 1.9888970  | 1.7903640  |
| C | -1.1259690 | 1.3933480  | 1.1456010  |
| H | -1.1339670 | 0.3264270  | 0.9330400  |
| C | -0.0148210 | 2.1614390  | 0.7683610  |
| H | 0.8347670  | 1.6944860  | 0.2805610  |
| C | 0.0032720  | 3.5423900  | 1.0215830  |
| H | 0.8650630  | 4.1364260  | 0.7359110  |
| C | -1.0942910 | 4.1495240  | 1.6501940  |
| H | -1.0851480 | 5.2164680  | 1.8480130  |
| C | -2.1993200 | 3.3736350  | 2.0307850  |
| H | -3.0373620 | 3.8436670  | 2.5414900  |
| N | -6.5033750 | 0.2818360  | 0.1052850  |
| H | -6.5102190 | 1.2042870  | -0.3282390 |
| N | -5.1079570 | 2.4863040  | 0.7034890  |
| H | -4.4854340 | 3.2190490  | 0.3775860  |
| H | -5.6655440 | 2.8046560  | 1.4930600  |
| O | -7.5150270 | -2.4391570 | -1.8792850 |
| O | -6.3811500 | -2.7385050 | 0.0468800  |
| O | -5.2753930 | -1.0129070 | 1.5701650  |
| C | -3.3760200 | -1.8587520 | -4.3028970 |
| N | -6.4247500 | -4.8566020 | -4.0642190 |
| C | -1.2799010 | 0.0549620  | -4.2853090 |
| C | -7.4748480 | -5.9175210 | -3.8184190 |
| H | -8.4358970 | -5.5064540 | -4.1303020 |
| H | -7.2416330 | -6.7660960 | -4.4657230 |
| C | -3.3329660 | -0.8337110 | -5.2669710 |
| H | -4.0796610 | -0.7902450 | -6.0538030 |
| C | -8.0957100 | -5.8068010 | -0.0553940 |

|   |            |            |            |
|---|------------|------------|------------|
| H | -8.6738230 | -5.2110670 | 0.6446530  |
| C | -7.4746130 | -6.3039420 | -2.3504310 |
| C | 1.0631520  | -1.6941340 | 4.3539860  |
| N | -5.9444830 | -6.3000790 | 2.4133770  |
| C | -5.7864830 | -2.6133060 | -4.5937200 |
| H | -6.1075690 | -1.6208660 | -4.8836680 |
| C | -1.2278510 | -1.9265290 | 3.3173240  |
| H | -1.0754680 | -0.9612770 | 2.8460890  |
| C | -3.6640060 | -6.1699200 | 3.1207400  |
| H | -2.7434320 | -6.6991540 | 3.3280730  |
| C | -2.2947830 | 0.1103140  | -5.2577720 |
| H | -2.2677270 | 0.8828320  | -6.0190080 |
| C | -6.7498680 | -7.4209720 | -1.8988750 |
| H | -6.2825890 | -8.0959610 | -2.6107170 |
| C | -4.4426120 | -2.8938920 | -4.2859120 |
| C | -2.3798520 | -2.6652690 | 3.0403050  |
| H | -3.1180660 | -2.2635600 | 2.3522800  |
| C | -3.7416020 | -4.7647720 | 3.2260410  |
| C | -7.2969100 | -6.8668370 | 0.4056270  |
| C | -0.2360500 | -2.4264570 | 4.1834750  |
| C | -0.4417990 | -3.6854500 | 4.7795210  |
| H | 0.2971110  | -4.0870220 | 5.4649730  |
| C | -2.3579720 | -1.9110500 | -3.3271400 |
| H | -2.3905260 | -2.6721490 | -2.5532080 |
| C | -1.3250420 | -0.9730800 | -3.3226000 |
| H | -0.5597680 | -1.0171650 | -2.5514280 |
| C | -4.9862310 | -4.1684620 | 2.9254330  |
| H | -5.1277270 | -3.0990740 | 3.0175650  |
| C | -6.0575880 | -4.9482470 | 2.5246550  |
| H | -7.0194800 | -4.5204280 | 2.2813110  |
| C | -6.7577380 | -3.6031650 | -4.4624090 |
| H | -7.8033500 | -3.4020480 | -4.6460780 |
| C | -4.1289360 | -4.2207500 | -3.9135030 |

|   |            |            |            |
|---|------------|------------|------------|
| H | -3.1106420 | -4.5212630 | -3.7056350 |
| C | -5.1243980 | -5.1719230 | -3.8140820 |
| H | -4.9143740 | -6.1912580 | -3.5241970 |
| C | -4.7677080 | -6.9099440 | 2.7153480  |
| H | -4.7324620 | -7.9873560 | 2.6231440  |
| C | -1.5870690 | -4.4366530 | 4.4927570  |
| H | -1.7222580 | -5.3938470 | 4.9860810  |
| C | -6.6554440 | -7.6969080 | -0.5283150 |
| H | -6.1065030 | -8.5735930 | -0.1971610 |
| C | -7.1218920 | -7.0964960 | 1.8951980  |
| H | -8.0007700 | -6.7798310 | 2.4611660  |
| H | -6.9353260 | -8.1460440 | 2.1282170  |
| C | -2.5634560 | -3.9455410 | 3.6033770  |
| C | -8.1779830 | -5.5219010 | -1.4210990 |
| H | -8.7891950 | -4.6939920 | -1.7611270 |
| C | 2.9133240  | 5.2314970  | -4.0920910 |
| N | 6.3690120  | 7.6409690  | -3.3621620 |
| C | 0.7562940  | 3.3876330  | -4.1418960 |
| C | 7.5957740  | 8.3091040  | -2.7945630 |
| H | 8.3940050  | 8.2423680  | -3.5359710 |
| H | 7.3618880  | 9.3660420  | -2.6505920 |
| C | 2.7489510  | 4.3477300  | -5.1774900 |
| H | 3.4322250  | 4.3800310  | -6.0203930 |
| C | 9.4179810  | 6.1452820  | -0.2000080 |
| H | 10.3145350 | 5.5346850  | -0.1497990 |
| C | 7.9740430  | 7.6280740  | -1.4849180 |
| C | 1.1642110  | -0.3611760 | 4.6383800  |
| N | 7.8928170  | 4.6678740  | 2.6862050  |
| C | 5.3860260  | 5.6901770  | -4.3355390 |
| H | 5.5357160  | 4.7378490  | -4.8272070 |
| C | 2.8432710  | 0.5961970  | 3.0572320  |
| H | 2.2441010  | 0.1746070  | 2.2580980  |
| C | 6.2201570  | 3.9720850  | 4.2504250  |

|   |           |           |            |
|---|-----------|-----------|------------|
| H | 5.7105730 | 4.1746950 | 5.1832460  |
| C | 1.6781620 | 3.4453540 | -5.2047760 |
| H | 1.5610330 | 2.7839750 | -6.0562600 |
| C | 7.1830680 | 7.8229210 | -0.3356260 |
| H | 6.3422750 | 8.5104640 | -0.3582250 |
| C | 4.0929920 | 6.1239300 | -3.9648790 |
| C | 3.9494690 | 1.3902780 | 2.7445690  |
| H | 4.1814450 | 1.5681650 | 1.6990440  |
| C | 5.8429830 | 2.8898970 | 3.4239960  |
| C | 8.6098500 | 6.3154680 | 0.9340800  |
| C | 2.4492060 | 0.3844400 | 4.3912680  |
| C | 3.2036610 | 0.9851760 | 5.4149560  |
| H | 2.9163970 | 0.8475320 | 6.4521220  |
| C | 1.9565350 | 5.2129050 | -3.0556640 |
| H | 2.0591230 | 5.8819600 | -2.2068100 |
| C | 0.8955320 | 4.3064520 | -3.0821100 |
| H | 0.1808730 | 4.2954590 | -2.2649870 |
| C | 6.5781180 | 2.7197450 | 2.2240060  |
| H | 6.3861640 | 1.8831080 | 1.5633300  |
| C | 7.5770390 | 3.6153130 | 1.8797290  |
| H | 8.1443110 | 3.5240820 | 0.9630550  |
| C | 6.4986560 | 6.4543120 | -4.0166740 |
| H | 7.5056670 | 6.1295580 | -4.2426320 |
| C | 3.9900170 | 7.4102940 | -3.3888540 |
| H | 3.0253220 | 7.8490620 | -3.1697240 |
| C | 5.1319210 | 8.1433130 | -3.0979790 |
| H | 5.0858930 | 9.1262490 | -2.6481200 |
| C | 7.2393890 | 4.8366200 | 3.8675490  |
| H | 7.5391430 | 5.6737650 | 4.4848250  |
| C | 4.3233190 | 1.7697540 | 5.1091220  |
| H | 4.8968010 | 2.1929520 | 5.9277640  |
| C | 7.4957240 | 7.1732710 | 0.8602290  |
| H | 6.8921610 | 7.3660170 | 1.7428270  |

|   |            |            |            |
|---|------------|------------|------------|
| C | 8.9658040  | 5.6363950  | 2.2464300  |
| H | 9.9014980  | 5.0782670  | 2.1658030  |
| H | 9.0839980  | 6.3694550  | 3.0475570  |
| C | 4.7076330  | 1.9958170  | 3.7686600  |
| C | 9.1019140  | 6.7985880  | -1.4036530 |
| H | 9.7590130  | 6.6781380  | -2.2595830 |
| C | -2.1741740 | 2.2074160  | 5.7050150  |
| N | -5.5927700 | 4.7783260  | 5.9072820  |
| C | 0.0180590  | 0.5098710  | 5.0553250  |
| C | -6.7697700 | 5.6834950  | 5.7258580  |
| H | -7.6128440 | 5.2675290  | 6.2825860  |
| H | -6.5240500 | 6.6444300  | 6.1864600  |
| C | -2.1465580 | 0.8654550  | 6.1427440  |
| H | -2.9486860 | 0.4711600  | 6.7589900  |
| C | -8.7848680 | 6.4599410  | 2.5649210  |
| H | -9.8136930 | 6.7122160  | 2.3273380  |
| C | -7.1210080 | 5.8739980  | 4.2506080  |
| C | -0.3596570 | 2.3839450  | -4.0942900 |
| N | -7.2724460 | 6.2229690  | -0.8750220 |
| C | -4.6725110 | 2.5715690  | 5.8062320  |
| H | -4.8514130 | 1.5083120  | 5.7091850  |
| C | -2.5433800 | 2.3875260  | -2.7994320 |
| H | -2.2466790 | 1.4661090  | -2.3125810 |
| C | -5.3022250 | 6.3516300  | -2.2255320 |
| H | -4.5180000 | 6.9738050  | -2.6368300 |
| C | -1.0581370 | 0.0412490  | 5.8442150  |
| H | -1.0453680 | -0.9697910 | 6.2330890  |
| C | -6.1454060 | 5.8351180  | 3.2398600  |
| H | -5.1060600 | 5.6244090  | 3.4783970  |
| C | -3.3541050 | 3.0819820  | 5.8899270  |
| C | -3.7376070 | 3.0007580  | -2.4245170 |
| H | -4.3673500 | 2.5240230  | -1.6812230 |
| C | -5.2873940 | 4.9479820  | -2.3873800 |

|   |            |            |            |
|---|------------|------------|------------|
| C | -7.8057510 | 6.4355160  | 1.5566850  |
| C | -1.7043780 | 2.9697270  | -3.7713460 |
| C | -2.1203360 | 4.1806220  | -4.3635450 |
| H | -1.5082220 | 4.6429030  | -5.1306360 |
| C | -1.0598880 | 2.7015810  | 5.0010030  |
| H | -1.0384530 | 3.7292460  | 4.6561320  |
| C | 0.0063580  | 1.8665260  | 4.6703850  |
| H | 0.8203430  | 2.2752690  | 4.0833030  |
| C | -6.3897710 | 4.2318900  | -1.8629420 |
| H | -6.4929200 | 3.1673290  | -2.0269330 |
| C | -7.3507130 | 4.8818790  | -1.1102580 |
| H | -8.1856900 | 4.3589340  | -0.6639380 |
| C | -5.7614290 | 3.4292220  | 5.8073630  |
| H | -6.7790740 | 3.0730850  | 5.7142580  |
| C | -3.2248550 | 4.4781610  | 6.0801330  |
| H | -2.2558240 | 4.9317530  | 6.2421750  |
| C | -4.3449280 | 5.2971890  | 6.0853640  |
| H | -4.2742580 | 6.3682600  | 6.2246410  |
| C | -6.2931140 | 6.9622740  | -1.4661560 |
| H | -6.3048430 | 8.0298510  | -1.2883320 |
| C | -3.3027800 | 4.8158620  | -3.9645640 |
| H | -3.5864890 | 5.7463900  | -4.4461110 |
| C | -6.4836290 | 6.1132810  | 1.9080980  |
| H | -5.6949990 | 6.1085610  | 1.1599330  |
| C | -8.1915850 | 6.8353170  | 0.1321720  |
| H | -9.2147120 | 6.5297590  | -0.1006540 |
| H | -8.1436830 | 7.9212100  | 0.0144440  |
| C | -4.1202190 | 4.2433570  | -2.9707010 |
| C | -8.4462820 | 6.1824040  | 3.8971160  |
| H | -9.2219510 | 6.2279330  | 4.6552770  |
| C | 4.4994760  | -4.2188960 | 3.5056560  |
| N | 7.8923500  | -6.2491970 | 1.9068850  |
| C | 2.2687160  | -2.5430460 | 4.0712120  |

|   |            |            |            |
|---|------------|------------|------------|
| C | 8.9941680  | -6.7288430 | 1.0032780  |
| H | 9.9461170  | -6.6009970 | 1.5214440  |
| H | 8.8490640  | -7.7986560 | 0.8359030  |
| C | 4.5162200  | -3.3457980 | 4.6101940  |
| H | 5.3724040  | -3.3219850 | 5.2764240  |
| C | 9.9446490  | -4.3873190 | -1.8943080 |
| H | 10.7882820 | -3.7671880 | -2.1814860 |
| C | 8.9475640  | -5.9445030 | -0.3047390 |
| C | -0.1485020 | 1.0420360  | -4.2462280 |
| N | 7.5191710  | -2.9853450 | -4.2311010 |
| C | 6.9910530  | -4.4754540 | 3.2307890  |
| H | 7.1703910  | -3.5362400 | 3.7365060  |
| C | 2.2555810  | 0.8064780  | -3.4507140 |
| H | 2.0939380  | 1.5945320  | -2.7254240 |
| C | 5.4854330  | -2.4734420 | -5.3894890 |
| H | 4.8808370  | -2.6536880 | -6.2679090 |
| C | 3.4148810  | -2.5294010 | 4.8928320  |
| H | 3.4391410  | -1.8964250 | 5.7720560  |
| C | 7.8371310  | -6.0726130 | -1.1627660 |
| H | 7.0325090  | -6.7608950 | -0.9203270 |
| C | 5.6899320  | -5.0041130 | 3.0986550  |
| C | 3.5064840  | 0.1912870  | -3.5008560 |
| H | 4.2717460  | 0.5644380  | -2.8318510 |
| C | 5.0844370  | -1.5647100 | -4.3804190 |
| C | 8.8304490  | -4.5055800 | -2.7380800 |
| C | 1.2139870  | 0.4149320  | -4.3152230 |
| C | 1.4732860  | -0.6424320 | -5.2140720 |
| H | 0.6955490  | -0.9721430 | -5.8949870 |
| C | 3.3344960  | -4.2718910 | 2.7124220  |
| H | 3.2865220  | -4.9380510 | 1.8550680  |
| C | 2.2426130  | -3.4474080 | 2.9893370  |
| H | 1.3577680  | -3.4969060 | 2.3626480  |
| C | 6.0096130  | -1.3647270 | -3.3217250 |

|   |            |            |            |
|---|------------|------------|------------|
| H | 5.8121080  | -0.6811360 | -2.5058640 |
| C | 7.1954910  | -2.0727420 | -3.2729430 |
| H | 7.9046430  | -1.9436720 | -2.4661210 |
| C | 8.0650960  | -5.1028440 | 2.6181400  |
| H | 9.0611960  | -4.6823480 | 2.6392950  |
| C | 5.5713170  | -6.2668950 | 2.4731520  |
| H | 4.6243890  | -6.7901420 | 2.4423200  |
| C | 6.6771980  | -6.8654960 | 1.8889330  |
| H | 6.6204320  | -7.8259480 | 1.3938750  |
| C | 6.6868580  | -3.1673780 | -5.2927400 |
| H | 6.9999960  | -3.8712800 | -6.0534410 |
| C | 2.7218400  | -1.2734100 | -5.2534500 |
| H | 2.8600650  | -2.0790660 | -5.9668900 |
| C | 7.7773410  | -5.3621560 | -2.3629740 |
| H | 6.9297180  | -5.5111680 | -3.0264910 |
| C | 8.7883750  | -3.7822780 | -4.0765530 |
| H | 9.6326790  | -3.0975130 | -4.1872380 |
| H | 8.8268400  | -4.4956920 | -4.9035010 |
| C | 3.7685650  | -0.8728200 | -4.3918940 |
| C | 10.0029970 | -5.1034990 | -0.6844780 |
| H | 10.8900970 | -5.0203420 | -0.0642490 |

*PP<sub>cage</sub>⇒(L)(tyr-tyr)<sub>2</sub>*

|   | X          | Y          | Z          |
|---|------------|------------|------------|
| C | 4.9617340  | -3.3811350 | 4.2752440  |
| N | 8.4838310  | -5.6992290 | 3.5035890  |
| C | 2.6183560  | -1.7898430 | 4.5068610  |
| C | 9.6835700  | -6.4506200 | 2.9718180  |
| H | 10.5777240 | -6.0069110 | 3.4129040  |
| H | 9.6124200  | -7.4822460 | 3.3223310  |
| C | 4.8624960  | -2.3887150 | 5.2712250  |
| H | 5.6659140  | -2.2447400 | 5.9868000  |
| C | 10.1716070 | -5.1149500 | -0.5809430 |



|   |            |            |            |
|---|------------|------------|------------|
| H | 10.6522040 | -4.2719370 | -1.0686560 |
| C | 9.6844980  | -6.3593680 | 1.4531330  |
| C | 0.4368150  | -1.1649710 | -4.4512750 |
| N | 7.9819100  | -5.0942890 | -3.1354810 |
| C | 7.4827700  | -3.6637890 | 4.2664960  |
| H | 7.6277690  | -2.6455740 | 4.6030810  |
| C | 2.7112780  | -1.2860960 | -3.3734350 |
| H | 2.4048600  | -0.4989930 | -2.6912000 |
| C | 6.4241090  | -4.2833850 | -4.7722700 |
| H | 6.1641560  | -4.2091730 | -5.8205280 |
| C | 3.7032300  | -1.6130320 | 5.3901680  |
| H | 3.6369310  | -0.8780310 | 6.1847200  |
| C | 9.0596750  | -7.3527690 | 0.6794470  |
| H | 8.6800430  | -8.2567280 | 1.1466160  |
| C | 6.1879340  | -4.1986570 | 4.0928610  |
| C | 3.9491280  | -1.9036170 | -3.1918800 |
| H | 4.5858040  | -1.5630820 | -2.3806420 |
| C | 5.6339850  | -3.6746730 | -3.7683730 |
| C | 9.4720980  | -6.0662220 | -1.3459220 |
| C | 1.8444200  | -1.6864330 | -4.4112150 |
| C | 2.2891550  | -2.6862130 | -5.2978970 |
| H | 1.6498350  | -3.0090830 | -6.1128820 |
| C | 3.8635890  | -3.5845270 | 3.4138830  |
| H | 3.9162720  | -4.3313520 | 2.6260150  |
| C | 2.7128140  | -2.8022360 | 3.5289890  |
| H | 1.8843330  | -2.9795190 | 2.8485830  |
| C | 6.0868150  | -3.8163970 | -2.4402180 |
| H | 5.5364600  | -3.4028930 | -1.6071050 |
| C | 7.2475590  | -4.5144290 | -2.1498720 |
| H | 7.5977580  | -4.6191280 | -1.1342490 |
| C | 8.6058610  | -4.4247730 | 3.9626850  |
| H | 9.6091170  | -4.0321420 | 4.0623060  |
| C | 6.1054620  | -5.5513440 | 3.6888850  |

|   |            |            |            |
|---|------------|------------|------------|
| H | 5.1491530  | -6.0509010 | 3.6145390  |
| C | 7.2526590  | -6.2719360 | 3.4032820  |
| H | 7.2201830  | -7.3059970 | 3.0884290  |
| C | 7.5774590  | -4.9810950 | -4.4348980 |
| H | 8.1996700  | -5.4527080 | -5.1855750 |
| C | 3.5366370  | -3.3001030 | -5.1268800 |
| H | 3.8249720  | -4.0907530 | -5.8119690 |
| C | 8.9486180  | -7.2046550 | -0.7095240 |
| H | 8.4693420  | -7.9850320 | -1.2923670 |
| C | 9.2684760  | -5.8573140 | -2.8297110 |
| H | 10.0849220 | -5.2785480 | -3.2689560 |
| H | 9.1960040  | -6.8103630 | -3.3585270 |
| C | 4.3722490  | -2.9421790 | -4.0498230 |
| C | 10.2732410 | -5.2576250 | 0.8082410  |
| H | 10.8310010 | -4.5218900 | 1.3800200  |
| C | -2.3469000 | 2.5410400  | 5.4159830  |
| N | -6.1594040 | 4.4823750  | 5.4319240  |
| C | 0.0956130  | 1.1482410  | 5.0222450  |
| C | -7.5024020 | 5.0896560  | 5.1060460  |
| H | -8.2460250 | 4.6424920  | 5.7679340  |
| H | -7.4481410 | 6.1560100  | 5.3347060  |
| C | -1.9893670 | 1.4678660  | 6.2556450  |
| H | -2.6306250 | 1.1806370  | 7.0830610  |
| C | -8.9412180 | 3.5654300  | 1.8932010  |
| H | -9.6612350 | 2.8018330  | 1.6143390  |
| C | -7.8126000 | 4.8353530  | 3.6373130  |
| C | 0.1228060  | 0.1627720  | -4.3473960 |
| N | -7.2492280 | 3.4142760  | -1.2007250 |
| C | -4.8456000 | 2.5178650  | 5.7958850  |
| H | -4.8250450 | 1.4567560  | 6.0072440  |
| C | -1.6797660 | 0.3282230  | -2.6169890 |
| H | -1.0490690 | -0.2740280 | -1.9722090 |
| C | -5.6399460 | 3.3307540  | -2.9691430 |

|   |            |            |            |
|---|------------|------------|------------|
| H | -5.3119010 | 3.7612280  | -3.9048070 |
| C | -0.7803600 | 0.7880780  | 6.0646710  |
| H | -0.5147480 | -0.0226910 | 6.7342280  |
| C | -7.1677560 | 5.5947880  | 2.6421570  |
| H | -6.5132630 | 6.4172510  | 2.9173350  |
| C | -3.6553030 | 3.2327030  | 5.5355230  |
| C | -2.8701560 | 0.8536790  | -2.1111930 |
| H | -3.1178900 | 0.6225030  | -1.0811910 |
| C | -4.9309700 | 2.2865960  | -2.3379660 |
| C | -8.2651170 | 4.2972150  | 0.9051780  |
| C | -1.2465020 | 0.6232950  | -3.9219730 |
| C | -2.0556550 | 1.4577270  | -4.7152480 |
| H | -1.7430440 | 1.7146410  | -5.7221200 |
| C | -1.4508850 | 2.9306090  | 4.3984040  |
| H | -1.7079930 | 3.7469470  | 3.7299400  |
| C | -0.2494360 | 2.2453020  | 4.2074670  |
| H | 0.4153830  | 2.5504630  | 3.4052390  |
| C | -5.4642800 | 1.8318950  | -1.1065430 |
| H | -4.9859180 | 1.0415660  | -0.5457340 |
| C | -6.6071770 | 2.3928120  | -0.5708490 |
| H | -7.0271760 | 2.0600120  | 0.3687010  |
| C | -6.0755120 | 3.1569490  | 5.7279350  |
| H | -7.0083500 | 2.6295090  | 5.8764970  |
| C | -3.7756930 | 4.6248850  | 5.3274530  |
| H | -2.8999500 | 5.2498660  | 5.2115270  |
| C | -5.0270330 | 5.2219390  | 5.2815140  |
| H | -5.1523500 | 6.2840430  | 5.1200380  |
| C | -6.7855180 | 3.8713790  | -2.3914720 |
| H | -7.3390190 | 4.6713420  | -2.8615110 |
| C | -3.2604560 | 1.9697310  | -4.2193610 |
| H | -3.8573950 | 2.5891370  | -4.8795640 |
| C | -7.3882670 | 5.3290150  | 1.2893530  |
| H | -6.9051460 | 5.9364340  | 0.5286420  |

|   |            |           |            |
|---|------------|-----------|------------|
| C | -8.4842390 | 4.0067670 | -0.5679820 |
| H | -9.2973160 | 3.2962610 | -0.7307600 |
| H | -8.7163110 | 4.9169260 | -1.1227540 |
| C | -3.6867510 | 1.6927170 | -2.9005400 |
| C | -8.7165810 | 3.8332500 | 3.2540840  |
| H | -9.2690090 | 3.2744850 | 4.0035410  |
| C | 2.8797530  | 3.4872340 | -4.7860140 |
| N | 5.5185300  | 6.8173260 | -4.4114330 |
| C | 1.1069250  | 1.2810010 | -4.5082550 |
| C | 6.4300420  | 7.9097920 | -3.9383330 |
| H | 7.3193370  | 7.9177900 | -4.5720070 |
| H | 5.9118220  | 8.8601990 | -4.0885070 |
| C | 3.0169720  | 2.3510840 | -5.6074020 |
| H | 3.7770530  | 2.3229700 | -6.3818560 |
| C | 8.4553940  | 7.7345210 | -0.6882010 |
| H | 9.4885240  | 7.8751190 | -0.3857120 |
| C | 6.7907610  | 7.7098680 | -2.4688830 |
| C | 1.3724420  | 0.3960410 | 4.7672480  |
| N | 7.0897420  | 6.3320200 | 2.4654750  |
| C | 5.2048540  | 4.4965480 | -4.8972080 |
| H | 5.6514630  | 3.5269800 | -5.0768250 |
| C | 3.4980750  | 1.0595840 | 3.5561470  |
| H | 3.4137580  | 0.1758610 | 2.9359940  |
| C | 5.2968610  | 5.6163430 | 3.8785670  |
| H | 4.4799930  | 5.9112680 | 4.5231750  |
| C | 2.1340350  | 1.2700010 | -5.4772240 |
| H | 2.2322300  | 0.4261380 | -6.1509710 |
| C | 5.7940980  | 7.4337460 | -1.5125250 |
| H | 4.7498610  | 7.3386740 | -1.7989340 |
| C | 3.8017040  | 4.6518850 | -4.8228430 |
| C | 4.4965580  | 1.9899400 | 3.2677740  |
| H | 5.1389110  | 1.7920560 | 2.4148480  |
| C | 5.5398270  | 4.2586300 | 3.5679860  |

|   |            |            |            |
|---|------------|------------|------------|
| C | 7.4626950  | 7.4631190  | 0.2651920  |
| C | 2.5804570  | 1.2716930  | 4.6042440  |
| C | 2.7595790  | 2.4172720  | 5.4081640  |
| H | 2.1011460  | 2.5927560  | 6.2520230  |
| C | 1.8397790  | 3.5081450  | -3.8363850 |
| H | 1.7326000  | 4.3683320  | -3.1831610 |
| C | 0.9710230  | 2.4265980  | -3.6977180 |
| H | 0.1958360  | 2.4690700  | -2.9410900 |
| C | 6.6573010  | 3.9946920  | 2.7372500  |
| H | 6.9641000  | 2.9813900  | 2.5148370  |
| C | 7.3985450  | 5.0328240  | 2.1973610  |
| H | 8.2422720  | 4.8636710  | 1.5413900  |
| C | 6.0362450  | 5.5845790  | -4.6796880 |
| H | 7.1149520  | 5.5000100  | -4.6798820 |
| C | 3.3057220  | 5.9610670  | -4.6668990 |
| H | 2.2447720  | 6.1684710  | -4.6798130 |
| C | 4.1755520  | 7.0210910  | -4.4524280 |
| H | 3.8163820  | 8.0252440  | -4.2731380 |
| C | 6.0765860  | 6.6237770  | 3.3247600  |
| H | 5.8957090  | 7.6695830  | 3.5368430  |
| C | 3.7586820  | 3.3536580  | 5.1223100  |
| H | 3.8625140  | 4.2121160  | 5.7775170  |
| C | 6.1296150  | 7.3110050  | -0.1606450 |
| H | 5.3345930  | 7.1252130  | 0.5569180  |
| C | 7.8274310  | 7.4242600  | 1.7452340  |
| H | 8.8988240  | 7.2644500  | 1.8882560  |
| H | 7.5699070  | 8.3681900  | 2.2327730  |
| C | 4.6181430  | 3.1825630  | 4.0154190  |
| C | 8.1205680  | 7.8572460  | -2.0467440 |
| H | 8.9035030  | 8.0889070  | -2.7621090 |
| C | -2.6639290 | -4.2234270 | -4.4456220 |
| N | -5.8932920 | -6.8861390 | -3.5498330 |
| C | -0.6231660 | -2.2257880 | -4.4812590 |

|   |            |            |            |
|---|------------|------------|------------|
| C | -6.9926530 | -7.6699650 | -2.8804120 |
| H | -7.9316680 | -7.4202650 | -3.3790450 |
| H | -6.8018770 | -8.7321680 | -3.0429910 |
| C | -2.8183270 | -3.0387650 | -5.1971580 |
| H | -3.7026700 | -2.8793850 | -5.8050040 |
| C | -7.5642140 | -5.7214940 | 0.3692860  |
| H | -8.0149810 | -4.7789270 | 0.6698050  |
| C | -7.0224580 | -7.3132340 | -1.3990480 |
| C | 1.3722170  | -0.9625350 | 4.5989100  |
| N | -5.8873730 | -5.4446970 | 3.2238330  |
| C | -5.1241780 | -4.8009330 | -4.4281160 |
| H | -5.3875500 | -3.8201590 | -4.8006980 |
| C | -0.8659570 | -1.3213830 | 3.4782060  |
| H | -0.6827760 | -0.4362260 | 2.8785150  |
| C | -3.6105790 | -5.3824760 | 3.9602120  |
| H | -2.7494430 | -5.9412140 | 4.3032080  |
| C | -1.8147350 | -2.0676100 | -5.2215750 |
| H | -1.9523980 | -1.1869510 | -5.8369170 |
| C | -6.5318360 | -8.2040690 | -0.4321800 |
| H | -6.1752300 | -9.1880800 | -0.7211110 |
| C | -3.7733920 | -5.1932650 | -4.2752980 |
| C | -2.0497710 | -2.0359570 | 3.2911270  |
| H | -2.7477720 | -1.6815920 | 2.5379930  |
| C | -3.5577060 | -3.9775230 | 3.7970670  |
| C | -7.0523790 | -6.6072250 | 1.3368640  |
| C | 0.0904280  | -1.7294910 | 4.4293940  |
| C | -0.1685060 | -2.8999040 | 5.1698210  |
| H | 0.5475600  | -3.2379790 | 5.9114580  |
| C | -1.4340320 | -4.4232280 | -3.7817490 |
| H | -1.2355590 | -5.3402770 | -3.2344260 |
| C | -0.4374820 | -3.4465450 | -3.7996250 |
| H | 0.4879170  | -3.6378130 | -3.2681750 |
| C | -4.7500120 | -3.3456310 | 3.3702580  |

|   |            |            |            |
|---|------------|------------|------------|
| H | -4.8208880 | -2.2698240 | 3.2774150  |
| C | -5.8894770 | -4.0892220 | 3.0943780  |
| H | -6.8146270 | -3.6207890 | 2.7771250  |
| C | -6.1545460 | -5.6545970 | -4.0666350 |
| H | -7.1946830 | -5.3720080 | -4.1614330 |
| C | -3.5502760 | -6.5305890 | -3.8680790 |
| H | -2.5551720 | -6.9535580 | -3.8363550 |
| C | -4.6120560 | -7.3422120 | -3.4995300 |
| H | -4.4673270 | -8.3557740 | -3.1493240 |
| C | -4.7721540 | -6.0851640 | 3.6705260  |
| H | -4.8358180 | -7.1592810 | 3.7860290  |
| C | -1.3494100 | -3.6272530 | 4.9790710  |
| H | -1.5291400 | -4.4973350 | 5.6026670  |
| C | -6.5524870 | -7.8542570 | 0.9275530  |
| H | -6.2177260 | -8.5808370 | 1.6622010  |
| C | -7.1030620 | -6.2386510 | 2.8120950  |
| H | -7.9790440 | -5.6276900 | 3.0384420  |
| H | -7.1449880 | -7.1265330 | 3.4458660  |
| C | -2.3111710 | -3.2067050 | 4.0355860  |
| C | -7.5516990 | -6.0770470 | -0.9833650 |
| H | -8.0109160 | -5.4112680 | -1.7092160 |
| O | -3.6908290 | -1.2350650 | 0.4956040  |
| O | -6.0579320 | -0.8839380 | 1.5081300  |
| O | -7.7231650 | -2.3503410 | 1.0551220  |
| O | -9.6511980 | 2.5775330  | -3.2264890 |
| O | 3.5458210  | -5.5794850 | 0.6493090  |
| N | -4.9522830 | -2.8229300 | -0.5720960 |
| N | -2.9933710 | -4.6115110 | -0.7032150 |
| C | -6.0869900 | -1.9009150 | -0.7225180 |
| C | -2.6747570 | -3.4274700 | 0.0972630  |
| C | -7.1139800 | -2.3309000 | -1.7803960 |
| C | -1.3474730 | -2.7268530 | -0.2554750 |
| C | -3.8110280 | -2.4101010 | 0.0049810  |

|   |             |            |            |
|---|-------------|------------|------------|
| C | -7.8871090  | -1.1014980 | -2.2289280 |
| C | -0.0907810  | -3.5326330 | 0.0212880  |
| C | -6.7308340  | -1.7315530 | 0.6741440  |
| C | -7.3615990  | -0.2837870 | -3.2469050 |
| C | -9.0757850  | -0.7105550 | -1.5896500 |
| C | 1.1080830   | -3.1358810 | -0.6026560 |
| C | -0.0464080  | -4.6371610 | 0.8878460  |
| C | -7.9899830  | 0.9114150  | -3.6036220 |
| C | -9.7068620  | 0.4968980  | -1.9264050 |
| C | 2.3038150   | -3.8261620 | -0.3944880 |
| C | 1.1475850   | -5.3390790 | 1.1136280  |
| C | -9.1476130  | 1.3128900  | -2.9222380 |
| C | 2.3185150   | -4.9372620 | 0.4574120  |
| H | -5.6684640  | -0.9375080 | -1.0288490 |
| H | -2.6448120  | -3.7191300 | 1.1548180  |
| H | -6.5734580  | -2.7717460 | -2.6260840 |
| H | -7.7838190  | -3.0853210 | -1.3590560 |
| H | -1.3094720  | -1.7825510 | 0.2993150  |
| H | -1.3743500  | -2.4649670 | -1.3223790 |
| H | -4.9622950  | -3.7869470 | -0.9057910 |
| H | -2.5828990  | -4.5946850 | -1.6311120 |
| H | -2.8517140  | -5.5001740 | -0.2400130 |
| H | -6.4629190  | -0.5879260 | -3.7793150 |
| H | -9.5161170  | -1.3438160 | -0.8257280 |
| H | 1.1076540   | -2.2783100 | -1.2712910 |
| H | -0.9379160  | -4.9694890 | 1.4107080  |
| H | -7.6252310  | 1.5259720  | -4.4181300 |
| H | -10.6325270 | 0.7833330  | -1.4363610 |
| H | 3.2138860   | -3.5257830 | -0.8990770 |
| H | 1.1588580   | -6.1895950 | 1.7890680  |
| H | -10.6185830 | 2.6166800  | -3.3435330 |
| H | 3.4485580   | -6.5226250 | 0.8712810  |
| O | 0.3386130   | 2.7606690  | -0.5348300 |



|   |            |            |            |
|---|------------|------------|------------|
| O | 0.1381120  | 7.4854250  | -2.4180320 |
| O | 2.2336620  | 6.8388620  | -1.9358400 |
| O | -5.8649170 | 6.8252050  | -1.2379180 |
| O | 7.3385160  | -2.1095520 | 0.0523450  |
| N | 1.5329450  | 4.7302180  | -0.4710560 |
| N | 3.7366350  | 3.4854230  | 0.3757980  |
| C | 0.4345540  | 5.5820570  | -0.8791120 |
| C | 2.8008840  | 2.6659920  | -0.4029680 |
| C | -0.3917480 | 6.1789360  | 0.3076380  |
| C | 2.6395980  | 1.1957550  | 0.0245780  |
| C | 1.4330420  | 3.3758980  | -0.4456500 |
| C | -1.8430600 | 6.4120410  | -0.0734730 |
| C | 3.9088820  | 0.3580520  | -0.0342410 |
| C | 1.0190090  | 6.6827790  | -1.7756580 |
| C | -2.7115700 | 5.3043940  | -0.1648200 |
| C | -2.3546280 | 7.6910210  | -0.3596360 |
| C | 3.9270240  | -0.8924440 | 0.6179940  |
| C | 5.0785360  | 0.7505020  | -0.7096710 |
| C | -4.0459600 | 5.4690260  | -0.5355290 |
| C | -3.6907680 | 7.8670790  | -0.7581130 |
| C | 5.0661840  | -1.7009070 | 0.6346300  |
| C | 6.2362180  | -0.0457450 | -0.7018400 |
| C | -4.5302610 | 6.7487580  | -0.8523560 |
| C | 6.2320540  | -1.2645710 | -0.0094630 |
| H | -0.2539270 | 4.9672610  | -1.4741680 |
| H | 3.1424300  | 2.6892330  | -1.4477910 |
| H | -0.3355000 | 5.4397220  | 1.1121480  |
| H | 0.0766600  | 7.0986300  | 0.6726990  |
| H | 1.8610220  | 0.7511130  | -0.6079790 |
| H | 2.2385560  | 1.1673730  | 1.0462840  |
| H | 2.4678850  | 5.1161510  | -0.3611790 |
| H | 3.6052950  | 3.4243740  | 1.3800310  |
| H | 4.7106020  | 3.4118850  | 0.1123430  |

|   |            |            |            |
|---|------------|------------|------------|
| H | -2.3334060 | 4.3089330  | 0.0561230  |
| H | -1.7243180 | 8.5698150  | -0.2519490 |
| H | 3.0315320  | -1.2473690 | 1.1220930  |
| H | 5.1082570  | 1.6761040  | -1.2751640 |
| H | -4.7207220 | 4.6229080  | -0.5777120 |
| H | -4.0606170 | 8.8639100  | -0.9787460 |
| H | 5.0675980  | -2.6531820 | 1.1520630  |
| H | 7.1248580  | 0.2855990  | -1.2322580 |
| H | -6.1503990 | 7.7205080  | -1.4974450 |
| H | 8.1542410  | -1.6980250 | -0.2832420 |

*MM<sub>cage</sub>⇒(D)(phe-phe)<sub>2</sub>*

|   | X          | Y         | Z          |
|---|------------|-----------|------------|
| C | -0.5307050 | 3.2194670 | 1.0008750  |
| H | 0.1605490  | 3.5452020 | 1.7679900  |
| C | -1.7681270 | 3.8708140 | 0.8807630  |
| H | -2.0198010 | 4.6692730 | 1.5709350  |
| C | -2.6685540 | 3.5024020 | -0.1275780 |
| H | -3.6199510 | 4.0159610 | -0.2261430 |
| C | -2.3195130 | 2.4800640 | -1.0248420 |
| H | -2.9984460 | 2.2062690 | -1.8263470 |
| C | -1.0831880 | 1.8373870 | -0.9061730 |
| H | -0.8089500 | 1.0587360 | -1.6151510 |
| C | -0.1772800 | 2.1925650 | 0.1115900  |
| C | 1.1085290  | 1.3872520 | 0.1999950  |
| H | 1.5213430  | 1.2768080 | -0.8116880 |
| H | 0.8459760  | 0.3785120 | 0.5501570  |
| C | 2.2452370  | 1.8718960 | 1.1258870  |
| C | 4.4593660  | 1.0125800 | 1.7730250  |
| C | 5.6345390  | 0.1675510 | 1.2969590  |
| C | 6.3703750  | 1.0601540 | 0.2423230  |
| H | 5.6207580  | 1.4661560 | -0.4487440 |
| H | 6.8040700  | 1.9077310 | 0.7860450  |

|   |            |            |            |
|---|------------|------------|------------|
| C | 7.4397720  | 0.3138100  | -0.5234670 |
| C | 8.7830400  | 0.3289780  | -0.0999860 |
| H | 9.0672130  | 0.9075650  | 0.7755370  |
| C | 9.7713280  | -0.3649600 | -0.8176500 |
| H | 10.8040250 | -0.3339270 | -0.4891900 |
| C | 9.4287180  | -1.0747990 | -1.9791640 |
| H | 10.2008470 | -1.5799960 | -2.5487440 |
| C | 8.0923160  | -1.0910520 | -2.4115590 |
| H | 7.8265370  | -1.6058870 | -3.3301040 |
| C | 7.1063310  | -0.4086410 | -1.6860330 |
| H | 6.0743590  | -0.4192510 | -2.0327490 |
| N | 3.2972030  | 0.8593590  | 1.0740600  |
| H | 3.2378660  | 0.1323270  | 0.3697240  |
| O | 4.5904410  | 1.8892840  | 2.6620430  |
| C | -0.5619540 | -3.5633950 | -0.1199110 |
| C | -0.5515080 | -2.9815700 | -1.5436830 |
| C | -2.5383400 | -2.2890210 | 0.7588030  |
| C | -3.9631870 | -2.4392410 | 1.2978900  |
| C | -4.8746250 | -1.3046060 | 0.7694600  |
| H | -4.3451740 | -0.3568670 | 0.8995290  |
| H | -5.0249740 | -1.4467360 | -0.3096720 |
| C | -6.2047420 | -1.2922220 | 1.4975290  |
| C | -7.3493070 | -1.8881770 | 0.9386050  |
| H | -7.2917220 | -2.3447180 | -0.0470210 |
| C | -8.5737210 | -1.8849590 | 1.6279410  |
| H | -9.4554270 | -2.3247950 | 1.1733590  |
| C | -8.6671350 | -1.2862320 | 2.8946930  |
| H | -9.6150300 | -1.2637040 | 3.4207130  |
| C | -7.5259690 | -0.6971830 | 3.4675790  |
| H | -7.5944930 | -0.2304310 | 4.4445780  |
| C | -6.3053050 | -0.7060010 | 2.7756570  |
| H | -5.4267730 | -0.2550980 | 3.2309460  |
| N | -1.9052170 | -3.4422140 | 0.4691940  |

|   |            |            |            |
|---|------------|------------|------------|
| H | -2.4912890 | -4.2669650 | 0.6096760  |
| O | -0.3077390 | -3.6715960 | -2.5306600 |
| O | -0.7930800 | -1.6405000 | -1.6437260 |
| O | -2.0156340 | -1.1409370 | 0.5729150  |
| C | 0.5550490  | -2.9287730 | 0.7545420  |
| H | 0.2786350  | -1.9010000 | 1.0051490  |
| H | -0.3594760 | -4.6293870 | -0.2371730 |
| N | -4.4590270 | -3.7910580 | 1.0059950  |
| H | -4.9173250 | -3.8700040 | 0.1011140  |
| H | -5.0507490 | -4.1709250 | 1.7344140  |
| H | -3.8894370 | -2.3262790 | 2.3853950  |
| N | 6.4547350  | -0.2137320 | 2.4443810  |
| H | 6.4573670  | 0.4987780  | 3.1708300  |
| H | 7.3976220  | -0.4949710 | 2.1901010  |
| H | 5.2676240  | -0.7359740 | 0.7890630  |
| H | 1.8948450  | 1.9961720  | 2.1531240  |
| C | 2.8558070  | 3.2088410  | 0.6784020  |
| O | 3.7105980  | 3.3337470  | -0.2043230 |
| O | 2.3646840  | 4.2697390  | 1.3788020  |
| C | -3.9094230 | -1.9237970 | -4.8999060 |
| N | 6.5853570  | -5.2382110 | 2.5121980  |
| C | -3.1077050 | -2.0545450 | -6.0547230 |
| H | -3.3679170 | -2.7651430 | -6.8325410 |
| C | -1.9655540 | -1.2645190 | -6.2269840 |
| H | -1.3497390 | -1.4101920 | -7.1079530 |
| C | 0.6296770  | -1.9023120 | 4.5265540  |
| C | 1.0212910  | -3.0625420 | 5.2233940  |
| H | 0.3768810  | -3.4739610 | 5.9933840  |
| C | 2.2318150  | -3.7069380 | 4.9335440  |
| H | 2.5040090  | -4.5891760 | 5.5044620  |
| C | 3.0974420  | -3.1990400 | 3.9436120  |
| C | 2.7330120  | -2.0063570 | 3.2856310  |
| H | 3.3725400  | -1.5942260 | 2.5120950  |

|   |             |            |            |
|---|-------------|------------|------------|
| C | 1.5198300   | -1.3797460 | 3.5648430  |
| H | 1.2479670   | -0.4837400 | 3.0161140  |
| N | 6.3199860   | -5.1340160 | -4.5152370 |
| N | -7.0909980  | -4.6501630 | -3.9429230 |
| C | 7.9354630   | -4.8387150 | -1.8168750 |
| H | 8.2831400   | -3.9750440 | -2.3765620 |
| C | -1.5889670  | -0.3132660 | -5.2586430 |
| C | 2.0468340   | -0.4199650 | -6.1815770 |
| H | 2.1078710   | 0.4367650  | -6.8437430 |
| C | 7.7524950   | -5.9279600 | 1.8523210  |
| H | 8.6569100   | -5.4032060 | 2.1686150  |
| H | 7.8058380   | -6.9419950 | 2.2520090  |
| C | 6.5742150   | -3.8977380 | -5.0253690 |
| H | 7.6130250   | -3.6348420 | -5.1777560 |
| C | 0.8279390   | -1.7777750 | -4.5960630 |
| H | -0.0491410  | -1.9765470 | -3.9972640 |
| C | 7.6205680   | -5.9354750 | 0.3358750  |
| C | 3.9713080   | -4.7296120 | -4.6825680 |
| H | 2.9709670   | -5.1276690 | -4.5858610 |
| C | 4.1923500   | -3.3997860 | -5.1210150 |
| C | 3.1132830   | -1.3276250 | -6.1315210 |
| H | 3.9649220   | -1.1622640 | -6.7840370 |
| C | 4.3341000   | -3.9070000 | 3.5301230  |
| C | -9.5082140  | -6.2310210 | 0.0052450  |
| H | -10.4792860 | -6.2925420 | 0.4865880  |
| C | -9.4441630  | -5.8893310 | -1.3566590 |
| H | -10.3681730 | -5.6964630 | -1.8931040 |
| C | -8.2106210  | -5.8418690 | -2.0239510 |
| C | -7.0354910  | -6.1261780 | -1.3017300 |
| H | -6.0713620  | -6.1363190 | -1.8042680 |
| C | -7.0994940  | -6.4644030 | 0.0541410  |
| H | -6.1799150  | -6.7259610 | 0.5721120  |
| C | -8.3393140  | -6.5293530 | 0.7206860  |

|   |            |            |            |
|---|------------|------------|------------|
| C | 1.8893070  | -2.6738400 | -4.5321880 |
| H | 1.7924210  | -3.5168430 | -3.8578200 |
| C | -3.5616360 | -0.9302830 | -3.9588030 |
| H | -4.1353050 | -0.8102660 | -3.0442510 |
| C | -0.7252660 | -1.2687920 | 4.7066960  |
| C | 7.1712040  | -7.0841160 | -0.3352900 |
| H | 6.9166310  | -7.9811310 | 0.2212110  |
| C | -0.2417700 | 0.3526470  | -5.2903320 |
| C | -8.1745560 | -5.6057600 | -3.5291190 |
| H | -7.9935260 | -6.5472320 | -4.0542810 |
| H | -9.1275670 | -5.2100640 | -3.8891520 |
| C | 5.0333890  | -5.5603600 | -4.3791400 |
| H | 4.8901200  | -6.5716270 | -4.0225890 |
| C | -2.4257530 | -0.1418570 | -4.1383530 |
| H | -2.1454290 | 0.5732650  | -3.3744550 |
| C | -7.1314660 | -3.3646260 | -3.4902660 |
| H | -7.9844760 | -3.0965110 | -2.8806430 |
| C | -5.0367320 | -2.8456400 | -4.6249490 |
| C | 7.4774500  | -5.9867910 | -2.4892580 |
| C | -6.0796470 | -5.0455620 | -4.7657330 |
| H | -6.1060430 | -6.0659040 | -5.1263720 |
| C | -6.1370760 | -2.4592690 | -3.8158910 |
| H | -6.2376830 | -1.4408910 | -3.4644460 |
| C | 0.8997320  | -0.6176810 | -5.3856980 |
| C | 5.4622440  | -3.1934850 | 3.0656000  |
| H | 5.5327440  | -2.1055120 | 3.0864570  |
| C | 5.5400070  | -3.0227010 | -5.3297590 |
| H | 5.7956300  | -2.0429320 | -5.7120950 |
| C | -6.5510930 | -4.2275930 | 3.8578360  |
| H | -6.7148950 | -3.1676600 | 4.0065370  |
| C | -7.5716880 | -4.9725690 | 3.2897200  |
| H | -8.5129910 | -4.5257110 | 2.9990970  |
| N | -7.4032340 | -6.2960350 | 3.0165940  |

|   |            |            |            |
|---|------------|------------|------------|
| C | -6.2649520 | -6.9359780 | 3.4063070  |
| H | -6.2167680 | -8.0041750 | 3.2380710  |
| C | -5.2104460 | -6.2285460 | 3.9701360  |
| H | -4.3217880 | -6.7728750 | 4.2628260  |
| C | -5.3027830 | -4.8287820 | 4.1424700  |
| C | -5.0549010 | -4.1735330 | -5.1126430 |
| H | -4.2600950 | -4.5511410 | -5.7421820 |
| C | 6.5591530  | -3.8775200 | 2.5701170  |
| H | 7.4385180  | -3.3579440 | 2.2156660  |
| C | 7.1002030  | -7.1104480 | -1.7379780 |
| H | 6.7922060  | -8.0257420 | -2.2342460 |
| C | 5.5387070  | -5.9557710 | 3.0033030  |
| H | 5.6199580  | -7.0343660 | 2.9681670  |
| C | 7.4318390  | -6.0122840 | -4.0110580 |
| H | 8.3654650  | -5.6474390 | -4.4445160 |
| H | 7.2635360  | -7.0212870 | -4.3929150 |
| C | 4.4165200  | -5.3175230 | 3.5182660  |
| H | 3.6034240  | -5.9322820 | 3.8827580  |
| C | 3.0618760  | -2.4582040 | -5.2842540 |
| C | 8.0100920  | -4.8131900 | -0.4216910 |
| H | 8.4233900  | -3.9327570 | 0.0626570  |
| C | -8.4280380 | -6.9943630 | 2.1729200  |
| H | -9.4157280 | -6.7987740 | 2.5960130  |
| H | -8.2463840 | -8.0695080 | 2.2490620  |
| C | -3.1211890 | -1.9275390 | 5.2983210  |
| H | -3.2167690 | -1.0450100 | 5.9175230  |
| C | -4.2181440 | -2.7874460 | 5.1866950  |
| H | -5.1369620 | -2.5379900 | 5.7077980  |
| C | -4.1214900 | -3.9872920 | 4.4526470  |
| C | -2.8788560 | -4.3120860 | 3.8737240  |
| H | -2.7655440 | -5.2290060 | 3.3047120  |
| C | -1.8005890 | -3.4296390 | 3.9525400  |
| H | -0.8730380 | -3.7013280 | 3.4642850  |

|   |            |            |            |
|---|------------|------------|------------|
| C | -1.8984950 | -2.2010340 | 4.6407770  |
| C | 3.7696040  | 3.2870700  | -3.7221700 |
| N | -7.3220110 | 5.3822630  | 2.7328400  |
| C | 3.0684070  | 3.8983000  | -4.7796110 |
| H | 3.4715340  | 4.7790470  | -5.2698410 |
| C | 1.8573400  | 3.3613560  | -5.2354430 |
| H | 1.3336480  | 3.8493490  | -6.0505430 |
| C | -2.1178630 | 0.8554100  | 4.5656560  |
| C | -2.6842850 | 1.7034360  | 5.5375920  |
| H | -2.2836600 | 1.7111600  | 6.5459970  |
| C | -3.7525390 | 2.5486340  | 5.2187900  |
| H | -4.1812740 | 3.1625620  | 6.0043750  |
| C | -4.2702240 | 2.5916550  | 3.9056170  |
| C | -3.7049840 | 1.7351980  | 2.9380490  |
| H | -4.0380040 | 1.7779150  | 1.9057290  |
| C | -2.6513930 | 0.8733020  | 3.2616270  |
| H | -2.2145980 | 0.2553110  | 2.4814070  |
| N | -6.4347060 | 7.2995700  | -3.9066560 |
| N | 7.2587160  | 4.9694300  | -1.9034150 |
| C | -8.9087060 | 6.9287830  | -1.4906720 |
| H | -9.6787520 | 6.7241370  | -2.2282140 |
| C | 1.3132830  | 2.2046290  | -4.6476700 |
| C | -2.2079050 | 2.6964520  | -5.9237580 |
| H | -2.2178810 | 1.9790860  | -6.7365990 |
| C | -8.3672590 | 6.3677310  | 2.2626450  |
| H | -9.3446500 | 5.8975960  | 2.3939560  |
| H | -8.3204450 | 7.2286320  | 2.9332750  |
| C | -6.7129540 | 6.0668580  | -4.4136690 |
| H | -7.7572240 | 5.7922960  | -4.4835740 |
| C | -1.1289150 | 3.6894180  | -3.9999870 |
| H | -0.3221920 | 3.7186650  | -3.2759440 |
| C | -8.1423290 | 6.7881870  | 0.8192610  |
| C | -4.0950210 | 6.9046180  | -4.1968240 |



|   |            |           |            |
|---|------------|-----------|------------|
| H | -3.0869590 | 7.2947490 | -4.1451960 |
| C | -4.3419890 | 5.5793990 | -4.6236190 |
| C | -3.2432270 | 3.6336900 | -5.8280960 |
| H | -4.0298270 | 3.6266830 | -6.5762470 |
| C | -5.3477980 | 3.5420800 | 3.5293650  |
| C | 8.7346640  | 6.2173060 | 2.6408790  |
| H | 9.4066870  | 6.7875340 | 3.2748980  |
| C | 8.9395450  | 6.2256370 | 1.2582640  |
| H | 9.7683500  | 6.7986090 | 0.8538800  |
| C | 8.0812330  | 5.5083470 | 0.4027200  |
| C | 7.0173460  | 4.7863740 | 0.9616220  |
| H | 6.3136210  | 4.2397410 | 0.3394560  |
| C | 6.8193050  | 4.7651300 | 2.3528580  |
| H | 5.9942540  | 4.1712910 | 2.7373510  |
| C | 7.6726740  | 5.4836420 | 3.2040230  |
| C | -2.1507450 | 4.6340300 | -3.9100650 |
| H | -2.1203430 | 5.3640150 | -3.1070860 |
| C | 3.2371090  | 2.1155390 | -3.1449590 |
| H | 3.7422150  | 1.6595990 | -2.2981160 |
| C | -0.8521510 | 0.0892830 | 4.8334050  |
| C | -7.0015720 | 7.5356940 | 0.4686500  |
| H | -6.2792850 | 7.8231660 | 1.2277780  |
| C | -0.0397280 | 1.6801670 | -5.0379200 |
| C | 8.3800650  | 5.5288100 | -1.0954090 |
| H | 8.5723170  | 6.5480680 | -1.4392940 |
| H | 9.2763880  | 4.9428000 | -1.3180570 |
| C | -5.1469410 | 7.7383070 | -3.8478600 |
| H | -4.9889570 | 8.7558590 | -3.5159760 |
| C | 2.0261390  | 1.5908980 | -3.5964380 |
| H | 1.6143180  | 0.6998440 | -3.1314070 |
| C | 7.1877640  | 3.6264090 | -2.1193060 |
| H | 8.0221660  | 3.0273370 | -1.7765540 |
| C | 5.0092730  | 3.8768860 | -3.1642020 |

|   |            |           |            |
|---|------------|-----------|------------|
| C | -7.7607750 | 7.6530030 | -1.8442270 |
| C | 6.2656190  | 5.7886940 | -2.3488380 |
| H | 6.3880460  | 6.8487660 | -2.1690190 |
| C | 6.0853960  | 3.0659270 | -2.7428730 |
| H | 6.0804420  | 1.9966180 | -2.9091180 |
| C | -1.1454620 | 2.6897040 | -4.9943700 |
| C | -6.2614040 | 3.2503920 | 2.4860920  |
| H | -6.2483380 | 2.2903500 | 1.9857220  |
| C | -5.6943420 | 5.2019890 | -4.7869910 |
| H | -5.9586630 | 4.2219280 | -5.1623890 |
| C | 5.1240090  | 2.7748750 | 5.6578840  |
| H | 5.1943350  | 1.7180280 | 5.8757400  |
| C | 6.2955000  | 3.4940500 | 5.4838630  |
| H | 7.2728740  | 3.0397740 | 5.5758320  |
| N | 6.2619180  | 4.8135530 | 5.1489350  |
| C | 5.0710630  | 5.4695690 | 5.0671450  |
| H | 5.1120940  | 6.5294370 | 4.8531810  |
| C | 3.8754580  | 4.7907010 | 5.2342020  |
| H | 2.9523550  | 5.3520600 | 5.1774430  |
| C | 3.8716010  | 3.3982070 | 5.4746260  |
| C | 5.1474610  | 5.2704650 | -2.9857680 |
| H | 4.3727350  | 5.9547470 | -3.3061530 |
| C | -7.2199240 | 4.1759880 | 2.1076400  |
| H | -7.9267910 | 3.9854740 | 1.3109080  |
| C | -6.8148500 | 7.9643020 | -0.8474060 |
| H | -5.9503290 | 8.5781790 | -1.0835290 |
| C | -6.4889950 | 5.6827560 | 3.7658620  |
| H | -6.6235050 | 6.6428440 | 4.2474060  |
| C | -7.5373090 | 8.1132460 | -3.2801610 |
| H | -8.4350720 | 7.9957010 | -3.8896120 |
| H | -7.2408430 | 9.1634240 | -3.3257510 |
| C | -5.5032000 | 4.7906200 | 4.1732310  |
| H | -4.8500230 | 5.0934940 | 4.9810940  |

|   |             |            |            |
|---|-------------|------------|------------|
| C | -3.2335510  | 4.6118240  | -4.8119730 |
| C | -9.0985460  | 6.4986790  | -0.1659320 |
| H | -10.0131500 | 5.9733640  | 0.0925780  |
| C | 7.5081700   | 5.5091850  | 4.7244820  |
| H | 8.3549360   | 5.0237650  | 5.2168540  |
| H | 7.4707580   | 6.5377380  | 5.0933690  |
| C | 1.3086970   | 0.6478260  | 6.0653630  |
| H | 1.1909220   | -0.2357490 | 6.6822660  |
| C | 2.4437580   | 1.4481300  | 6.2260010  |
| H | 3.1767200   | 1.1737440  | 6.9779230  |
| C | 2.6185630   | 2.6102560  | 5.4482080  |
| C | 1.5934810   | 2.9845540  | 4.5579990  |
| H | 1.7007190   | 3.8718860  | 3.9422020  |
| C | 0.4616210   | 2.1841600  | 4.4017160  |
| H | -0.3107310  | 2.4827790  | 3.7014100  |
| C | 0.3227460   | 0.9764930  | 5.1126100  |
| C | 1.9204020   | -2.9639170 | 0.0843310  |
| C | 2.2970950   | -1.9802630 | -0.8531670 |
| C | 2.8344320   | -3.9911960 | 0.3766240  |
| C | 3.5561370   | -2.0172160 | -1.4698260 |
| H | 1.5860050   | -1.2114820 | -1.1411750 |
| C | 4.0977750   | -4.0301470 | -0.2344090 |
| H | 2.5567740   | -4.7672670 | 1.0846630  |
| C | 4.4677570   | -3.0375870 | -1.1544390 |
| H | 3.8061610   | -1.2717010 | -2.2195030 |
| H | 4.7894290   | -4.8364300 | -0.0075510 |
| H | 5.4482280   | -3.0665380 | -1.6198810 |
| H | 0.5937530   | -3.4828190 | 1.6971440  |

*MM<sub>cage</sub>⇒(D)(tyr-tyr)<sub>2</sub>*

|   | X          | Y          | Z          |
|---|------------|------------|------------|
| O | -2.1528460 | 0.5949870  | 0.0176710  |
| O | 5.5017010  | -3.1916080 | -0.2378020 |

|   |            |            |            |
|---|------------|------------|------------|
| N | -3.3247770 | -1.2516040 | -0.6360500 |
| C | -4.5697150 | -0.5110560 | -0.8555530 |
| C | -0.9557340 | -1.5461360 | 0.0424780  |
| C | 0.2989470  | -0.8008010 | -0.4481180 |
| C | -2.1844500 | -0.6392860 | -0.2091610 |
| C | 1.6410000  | -1.4864350 | -0.2558750 |
| C | 2.8066750  | -0.6928700 | -0.2816170 |
| C | 1.7909490  | -2.8784200 | -0.1536420 |
| C | 4.0824530  | -1.2717060 | -0.2721220 |
| C | 3.0616690  | -3.4727850 | -0.1345390 |
| C | 4.2061560  | -2.6672430 | -0.2216070 |
| H | -4.3453830 | 0.4173450  | -1.3860110 |
| H | 0.3167930  | 0.1926290  | 0.0169490  |
| H | 0.1681030  | -0.6229090 | -1.5245950 |
| H | -3.3657510 | -2.2601900 | -0.7113060 |
| H | 2.7105960  | 0.3905150  | -0.3292290 |
| H | 0.9159270  | -3.5128910 | -0.0711820 |
| H | 4.9774220  | -0.6579480 | -0.2902200 |
| H | 3.1528440  | -4.5531880 | -0.0537000 |
| H | 5.5180630  | -4.1647990 | -0.2109640 |
| O | 2.1458390  | 2.8194800  | -0.2452720 |
| O | -5.7137540 | 4.3848150  | -0.5780330 |
| O | 7.0205430  | 0.0760620  | 4.2174580  |
| N | 2.1342520  | 5.1102600  | -0.6164980 |
| C | 0.7160800  | 5.2694690  | -0.8977690 |
| C | 4.2410500  | 4.0667560  | -0.0202250 |
| C | -0.1124210 | 4.8842430  | 0.3721830  |
| C | 5.0334880  | 2.7839230  | -0.4188110 |
| C | 2.7371480  | 3.9274410  | -0.3266190 |
| C | -1.6096800 | 4.8112360  | 0.1924180  |
| C | 5.5950730  | 2.0431990  | 0.7811260  |
| C | -2.2049430 | 3.5535200  | 0.0233720  |
| C | -2.4228710 | 5.9549650  | 0.1495410  |

|   |            |            |            |
|---|------------|------------|------------|
| C | 4.7302050  | 1.5750250  | 1.7915530  |
| C | 6.9739600  | 1.8295390  | 0.9370440  |
| C | -3.5720790 | 3.4301630  | -0.2251610 |
| C | -3.8006210 | 5.8472480  | -0.0892500 |
| C | 5.2302070  | 0.9329620  | 2.9254260  |
| C | 7.4941650  | 1.1782430  | 2.0685550  |
| C | -4.3646780 | 4.5772570  | -0.2906670 |
| C | 6.6131170  | 0.7355940  | 3.0670840  |
| H | 0.2565650  | 3.9106900  | 0.7031330  |
| H | 0.1543510  | 5.6271360  | 1.1321210  |
| H | 5.8541450  | 3.0857590  | -1.0795760 |
| H | 4.3654550  | 2.1247610  | -0.9859500 |
| H | 2.7755420  | 5.8985550  | -0.6791080 |
| H | -1.6080320 | 2.6501910  | 0.0711050  |
| H | -1.9893140 | 6.9407800  | 0.2925980  |
| H | 3.6576110  | 1.7180310  | 1.6877590  |
| H | 7.6612090  | 2.1645240  | 0.1653560  |
| H | -4.0144010 | 2.4534480  | -0.3812220 |
| H | -4.4182930 | 6.7399300  | -0.1250800 |
| H | 4.5703780  | 0.5894850  | 3.7127710  |
| H | 8.5651230  | 1.0208360  | 2.1637860  |
| H | -6.2070580 | 5.2235750  | -0.6367060 |
| H | 7.9823820  | 0.0835700  | 4.3684840  |
| N | -0.8440530 | -1.8984070 | 1.4503260  |
| H | -0.4746160 | -1.1864040 | 2.0659930  |
| H | -1.5797990 | -2.4552150 | 1.8640720  |
| H | -1.0835290 | -2.4717160 | -0.5359020 |
| C | -5.2830400 | -0.1962140 | 0.5018770  |
| H | -4.7049590 | 0.6036290  | 0.9700180  |
| H | -5.1741690 | -1.0872860 | 1.1304490  |
| C | -6.7497600 | 0.1605250  | 0.3723420  |
| C | -7.1761940 | 1.4137390  | -0.0961590 |
| C | -7.7274450 | -0.8127640 | 0.6668770  |

|   |             |            |            |
|---|-------------|------------|------------|
| C | -8.5422600  | 1.6866520  | -0.2750380 |
| H | -6.4590650  | 2.1936260  | -0.3417670 |
| C | -9.0870330  | -0.5546720 | 0.5007620  |
| H | -7.4185700  | -1.7900130 | 1.0291370  |
| C | -9.5015910  | 0.7001640  | 0.0197560  |
| H | -8.8514010  | 2.6524610  | -0.6658670 |
| H | -9.8463330  | -1.2923920 | 0.7298690  |
| C | -5.4846680  | -1.3626940 | -1.7104910 |
| O | -5.5610830  | -2.5969720 | -1.6028040 |
| O | -6.2299580  | -0.6438400 | -2.5774690 |
| O | -10.8570800 | 0.8596590  | -0.1268290 |
| H | -11.1552500 | 1.7160640  | -0.4779170 |
| C | 0.2802340   | 4.5517010  | -2.1796330 |
| O | -0.8757160  | 4.5397010  | -2.6088400 |
| O | 1.3094060   | 3.9718030  | -2.8727380 |
| H | 0.5382430   | 6.3311700  | -1.1039650 |
| N | 4.7443620   | 5.3334060  | -0.5573260 |
| H | 5.5404950   | 5.7157690  | -0.0591190 |
| H | 4.9152760   | 5.3212510  | -1.5579040 |
| H | 4.2900300   | 4.1542070  | 1.0717090  |
| C | 3.6186140   | 1.8828020  | -4.3071520 |
| N | -7.1145740  | 5.5854950  | 2.5031310  |
| C | 2.5758530   | 2.1299170  | -5.2261220 |
| H | 2.6330230   | 2.9731300  | -5.9083250 |
| C | 1.4833890   | 1.2594240  | -5.3107080 |
| H | 0.7008240   | 1.4607450  | -6.0350970 |
| C | -1.4808200  | 1.6715300  | 4.4300320  |
| C | -1.9181100  | 2.6915980  | 5.2983740  |
| H | -1.3613790  | 2.9043840  | 6.2050050  |
| C | -3.0613720  | 3.4468980  | 5.0043220  |
| H | -3.3825010  | 4.2066490  | 5.7098720  |
| C | -3.7906750  | 3.2083480  | 3.8210190  |
| C | -3.3540770  | 2.1789690  | 2.9652110  |

|   |            |            |            |
|---|------------|------------|------------|
| H | -3.8510430 | 2.0150370  | 2.0186240  |
| C | -2.2219940 | 1.4207670  | 3.2618560  |
| H | -1.8915660 | 0.6715140  | 2.5502550  |
| N | -6.3419200 | 4.8909440  | -3.9800160 |
| N | 6.8883150  | 4.6080490  | -3.7561310 |
| C | -8.6823880 | 5.4063340  | -1.7409420 |
| H | -9.2658570 | 4.6946450  | -2.3169530 |
| C | 1.3921290  | 0.1172730  | -4.4837480 |
| C | -2.1733960 | 0.0007840  | -5.3402600 |
| H | -2.1319990 | -0.7059610 | -6.1621140 |
| C | -8.2392570 | 6.4161910  | 1.9239750  |
| H | -9.1804180 | 5.9824300  | 2.2688820  |
| H | -8.1586660 | 7.4195530  | 2.3453880  |
| C | -6.6741210 | 3.6575080  | -4.4507190 |
| H | -7.7001290 | 3.5072390  | -4.7596300 |
| C | -1.1936290 | 1.0151060  | -3.3763830 |
| H | -0.3915600 | 1.1018450  | -2.6502080 |
| C | -8.1471570 | 6.4291490  | 0.4071420  |
| C | -4.0788490 | 4.1708220  | -3.6607020 |
| H | -3.0698310 | 4.4317100  | -3.3621140 |
| C | -4.3927630 | 2.8734130  | -4.1338910 |
| C | -3.2690570 | 0.8738700  | -5.2364690 |
| H | -4.0388960 | 0.8347040  | -6.0008820 |
| C | -4.9627010 | 4.0286360  | 3.4243760  |
| C | 8.2154730  | 5.2307920  | 0.4211410  |
| H | 8.5045130  | 4.4732640  | 1.1435310  |
| C | 8.2819160  | 4.9372570  | -0.9423160 |
| H | 8.6390180  | 3.9600940  | -1.2560370 |
| C | 7.9385090  | 5.9071850  | -1.9040490 |
| C | 7.5740880  | 7.1916130  | -1.4718460 |
| H | 7.3649760  | 7.9771720  | -2.1914280 |
| C | 7.5140110  | 7.4907640  | -0.0982210 |
| H | 7.2596020  | 8.4998530  | 0.2106000  |

|   |            |            |            |
|---|------------|------------|------------|
| C | 7.8117040  | 6.5075190  | 0.8588740  |
| C | -2.2866340 | 1.8694820  | -3.2615210 |
| H | -2.3136900 | 2.5738430  | -2.4404000 |
| C | 3.5398230  | 0.7325850  | -3.4983920 |
| H | 4.3134200  | 0.5189350  | -2.7662080 |
| C | -0.1642960 | 0.9779830  | 4.6393540  |
| C | -7.2756130 | 7.3148450  | -0.2526620 |
| H | -6.7630880 | 8.0930470  | 0.3044650  |
| C | 0.1551520  | -0.7410970 | -4.5312110 |
| C | 7.9957140  | 5.5657330  | -3.3874560 |
| H | 7.8907300  | 6.4548000  | -4.0120530 |
| H | 8.9416700  | 5.0878530  | -3.6522290 |
| C | -5.0601120 | 5.1447630  | -3.5939000 |
| H | -4.8434770 | 6.1455710  | -3.2456580 |
| C | 2.4416890  | -0.1288500 | -3.5796830 |
| H | 2.4011990  | -0.9893040 | -2.9223190 |
| C | 7.1142020  | 3.2654780  | -3.7597040 |
| H | 8.1369150  | 2.9415250  | -3.6199660 |
| C | 4.7547080  | 2.8230200  | -4.1624570 |
| C | -7.7263510 | 6.2116920  | -2.3828980 |
| C | 5.6359080  | 5.0859920  | -4.0043630 |
| H | 5.5207630  | 6.1624200  | -4.0282760 |
| C | 6.0753140  | 2.3654890  | -3.9537990 |
| H | 6.3035270  | 1.3079530  | -3.9691000 |
| C | -1.1068760 | 0.0731230  | -4.4231650 |
| C | -6.0173860 | 3.4669470  | 2.6700520  |
| H | -6.0434680 | 2.4123440  | 2.4286090  |
| C | -5.7262120 | 2.6438630  | -4.5352010 |
| H | -6.0412600 | 1.6765730  | -4.9036260 |
| C | 5.6816760  | 4.1539780  | 4.0937730  |
| H | 5.8858630  | 3.2264090  | 4.6117040  |
| C | 6.7571510  | 4.9166130  | 3.6595150  |
| H | 7.7807760  | 4.6186440  | 3.8426240  |



|   |            |           |            |
|---|------------|-----------|------------|
| N | 6.5643160  | 6.0724060 | 2.9643740  |
| C | 5.2998020  | 6.5348250 | 2.7522160  |
| H | 5.2054860  | 7.4880710 | 2.2489230  |
| C | 4.1973180  | 5.8076240 | 3.1667180  |
| H | 3.2143140  | 6.2254560 | 2.9956560  |
| C | 4.3566630  | 4.5572870 | 3.8130770  |
| C | 4.5664910  | 4.2249740 | -4.2081680 |
| H | 3.5833200  | 4.6475720 | -4.3695120 |
| C | -7.0639550 | 4.2532390 | 2.2232960  |
| H | -7.8666850 | 3.8363320 | 1.6305580  |
| C | -7.0710900 | 7.2105210 | -1.6376330 |
| H | -6.4103420 | 7.9167930 | -2.1310980 |
| C | -6.1418770 | 6.1532570 | 3.2720580  |
| H | -6.2401150 | 7.2077040 | 3.4950170  |
| C | -7.3808430 | 5.9816140 | -3.8448460 |
| H | -8.2546700 | 5.6769340 | -4.4233610 |
| H | -6.9720210 | 6.8810640 | -4.3103020 |
| C | -5.0701900 | 5.4024890 | 3.7390520  |
| H | -4.3103940 | 5.9061210 | 4.3223860  |
| C | -3.3289560 | 1.8379480 | -4.2080780 |
| C | -8.8948350 | 5.5185100 | -0.3604500 |
| H | -9.6507900 | 4.9035870 | 0.1185410  |
| C | 7.7258470  | 6.8079940 | 2.3493960  |
| H | 8.6309740  | 6.4933650 | 2.8731240  |
| H | 7.5889270  | 7.8742530 | 2.5402420  |
| C | 2.0968220  | 1.9273960 | 5.3945420  |
| H | 2.0967960  | 1.2700460 | 6.2563170  |
| C | 3.1766790  | 2.7968160 | 5.1997230  |
| H | 3.9848810  | 2.7958070 | 5.9240240  |
| C | 3.1939350  | 3.6900150 | 4.1091700  |
| C | 2.0858280  | 3.7022650 | 3.2373220  |
| H | 2.0656390  | 4.3698510 | 2.3811290  |
| C | 1.0140190  | 2.8322470 | 3.4308300  |

|   |            |            |            |
|---|------------|------------|------------|
| H | 0.1780940  | 2.8575560  | 2.7398330  |
| C | 1.0080810  | 1.9114310  | 4.4986650  |
| C | -3.0809630 | -4.8847190 | -3.8944830 |
| N | 7.3262540  | -4.6826740 | 3.4076630  |
| C | -2.2034420 | -5.0641320 | -4.9827810 |
| H | -2.3022260 | -5.9223890 | -5.6398050 |
| C | -1.1931090 | -4.1275350 | -5.2431430 |
| H | -0.5157900 | -4.3033690 | -6.0721780 |
| C | 1.3705530  | -0.9824710 | 4.6864230  |
| C | 1.9768970  | -1.6777820 | 5.7493130  |
| H | 1.4978120  | -1.6993700 | 6.7225160  |
| C | 3.1914750  | -2.3508370 | 5.5657270  |
| H | 3.6431460  | -2.8443780 | 6.4200310  |
| C | 3.8194980  | -2.3717240 | 4.3014850  |
| C | 3.2123250  | -1.6633920 | 3.2453140  |
| H | 3.6444790  | -1.6639610 | 2.2521750  |
| C | 2.0208030  | -0.9676880 | 3.4399560  |
| H | 1.5873060  | -0.4280040 | 2.6039170  |
| N | 7.4400600  | -6.4633360 | -3.3566290 |
| N | -5.8542070 | -7.7784810 | -2.3652640 |
| C | 9.6633140  | -5.9824390 | -0.6001310 |
| H | 10.5487280 | -5.7754030 | -1.1930520 |
| C | -1.0276800 | -2.9813990 | -4.4365110 |
| C | 2.5231830  | -2.6613560 | -5.5177950 |
| H | 2.4146080  | -1.9140430 | -6.2959670 |
| C | 8.5263100  | -5.5116360 | 3.0298480  |
| H | 9.4221500  | -4.9451420 | 3.2954380  |
| H | 8.5045980  | -6.4111430 | 3.6500250  |
| C | 7.5071160  | -5.1475150 | -3.7019660 |
| H | 8.4639510  | -4.6592860 | -3.5726440 |
| C | 1.6197110  | -3.9188740 | -3.6597410 |
| H | 0.8153680  | -4.1281540 | -2.9628500 |
| C | 8.5262330  | -5.8790620 | 1.5545760  |

|   |            |            |            |
|---|------------|------------|------------|
| C | 5.1314610  | -6.5223560 | -3.9689040 |
| H | 4.2311130  | -7.1079770 | -4.1028510 |
| C | 5.1380700  | -5.1327100 | -4.2253180 |
| C | 3.7194940  | -3.3878560 | -5.4254730 |
| H | 4.5116720  | -3.1976610 | -6.1429590 |
| C | 5.0619730  | -3.1394520 | 4.0454480  |
| C | -8.0699930 | -7.8144950 | 1.8404440  |
| H | -9.0268610 | -7.5831480 | 2.2982010  |
| C | -8.0231840 | -8.0949090 | 0.4628140  |
| H | -8.9444610 | -8.0720360 | -0.1113050 |
| C | -6.8098260 | -8.4339500 | -0.1535290 |
| C | -5.6425970 | -8.5070270 | 0.6315600  |
| H | -4.7015180 | -8.8139600 | 0.1833450  |
| C | -5.6894720 | -8.2310260 | 1.9998140  |
| H | -4.7812070 | -8.3343310 | 2.5872550  |
| C | -6.9040630 | -7.8718990 | 2.6178980  |
| C | 2.7964850  | -4.6592590 | -3.5795900 |
| H | 2.8902560  | -5.4244190 | -2.8151270 |
| C | -2.9453830 | -3.7117070 | -3.1245130 |
| H | -3.6195170 | -3.5512740 | -2.2919610 |
| C | -0.0011900 | -0.3685800 | 4.7986770  |
| C | 7.4357760  | -6.5718490 | 0.9918620  |
| H | 6.5892460  | -6.8535120 | 1.6127260  |
| C | 0.1862110  | -2.1049720 | -4.5833970 |
| C | -6.7526740 | -8.7524970 | -1.6414210 |
| H | -6.3538440 | -9.7543240 | -1.8159060 |
| H | -7.7425090 | -8.7005950 | -2.1007560 |
| C | 6.2863480  | -7.1624030 | -3.5417080 |
| H | 6.3134910  | -8.2233060 | -3.3292950 |
| C | -1.9446170 | -2.7765700 | -3.3895380 |
| H | -1.8604810 | -1.8911820 | -2.7689780 |
| C | -6.1100910 | -6.4463190 | -2.2436120 |
| H | -6.9942170 | -6.1709950 | -1.6847750 |

|   |            |            |            |
|---|------------|------------|------------|
| C | -4.0895950 | -5.8967890 | -3.4777110 |
| C | 8.5724940  | -6.6572910 | -1.1639830 |
| C | -4.7873830 | -8.1987730 | -3.0981280 |
| H | -4.6495410 | -9.2671690 | -3.2043210 |
| C | -5.2611360 | -5.5006330 | -2.7877990 |
| H | -5.5138440 | -4.4576850 | -2.6498600 |
| C | 1.4678050  | -2.8929300 | -4.6141900 |
| C | 5.9121870  | -2.8060810 | 2.9633040  |
| H | 5.7262370  | -1.9378940 | 2.3464780  |
| C | 6.3827940  | -4.4696500 | -4.1497910 |
| H | 6.4653770  | -3.4160790 | -4.3815760 |
| C | -5.5070780 | -4.1743900 | 4.5483820  |
| H | -5.8337080 | -3.1602820 | 4.3568790  |
| C | -6.3992770 | -5.2145260 | 4.3257820  |
| H | -7.4053750 | -5.0457540 | 3.9649250  |
| N | -6.0331780 | -6.5104580 | 4.5305050  |
| C | -4.8008170 | -6.7979520 | 5.0336250  |
| H | -4.5869210 | -7.8370460 | 5.2476400  |
| C | -3.8697990 | -5.7926720 | 5.2567820  |
| H | -2.9060550 | -6.0642240 | 5.6677930  |
| C | -4.1850850 | -4.4446310 | 4.9705680  |
| C | -3.9009140 | -7.2843220 | -3.6615910 |
| H | -3.0477350 | -7.6720960 | -4.2031140 |
| C | 7.0124590  | -3.5854270 | 2.6616180  |
| H | 7.6552200  | -3.3654800 | 1.8203540  |
| C | 7.4598910  | -6.9567420 | -0.3507230 |
| H | 6.6289190  | -7.5344840 | -0.7467800 |
| C | 6.5641670  | -5.0060160 | 4.4895480  |
| H | 6.8645210  | -5.8710020 | 5.0670010  |
| C | 8.5950200  | -7.0914220 | -2.6261520 |
| H | 9.5206570  | -6.7943190 | -3.1226250 |
| H | 8.5007910  | -8.1755180 | -2.7240700 |
| C | 5.4395660  | -4.2599740 | 4.8204200  |

|   |            |            |            |
|---|------------|------------|------------|
| H | 4.8524540  | -4.5845670 | 5.6692810  |
| C | 3.8729880  | -4.3893580 | -4.4466580 |
| C | 9.6397670  | -5.5956170 | 0.7519870  |
| H | 10.5082790 | -5.0985320 | 1.1728000  |
| C | -6.9641470 | -7.6218750 | 4.1214140  |
| H | -7.9725530 | -7.3530980 | 4.4423150  |
| H | -6.6700230 | -8.5138170 | 4.6801850  |
| C | -2.3826550 | -1.1047520 | 5.4776950  |
| H | -2.5957970 | -0.1304570 | 5.8995320  |
| C | -3.3877810 | -2.0820260 | 5.5087880  |
| H | -4.3459440 | -1.8338800 | 5.9549820  |
| C | -3.1444900 | -3.3852620 | 5.0280490  |
| C | -1.8575280 | -3.6810570 | 4.5379080  |
| H | -1.6287600 | -4.6747790 | 4.1649220  |
| C | -0.8680980 | -2.6999020 | 4.4851710  |
| H | 0.0964020  | -2.9678060 | 4.0715560  |
| C | -1.1079720 | -1.3792590 | 4.9304860  |

***PPP*→3*S***

|   | X          | Y          | Z          |
|---|------------|------------|------------|
| C | 13.2730360 | 4.4138470  | -1.8765330 |
| H | 12.9693090 | 4.5093710  | -2.9273520 |
| H | 13.4465720 | 3.3562950  | -1.6529110 |
| C | 14.5665110 | 5.1823370  | -1.5840260 |
| H | 14.6408080 | 6.0998640  | -2.1845910 |
| H | 14.5883760 | 5.4498640  | -0.5253620 |
| C | 15.9133560 | 3.8633370  | -3.1574510 |
| H | 15.7432140 | 4.6944870  | -3.8593600 |
| H | 15.1921160 | 3.0624830  | -3.3657570 |
| C | 17.3411810 | 3.3206480  | -3.3261100 |
| H | 17.7443830 | 3.6185160  | -4.2960330 |
| H | 17.9692080 | 3.7483470  | -2.5312070 |
| C | 16.5661250 | -2.3274230 | -1.1734380 |

|   |             |            |            |
|---|-------------|------------|------------|
| H | 17.4110240  | -2.7683320 | -1.7257960 |
| C | 16.5089810  | -2.9944990 | 0.1995040  |
| H | 16.6491530  | -4.0787790 | 0.0631710  |
| H | 17.3225110  | -2.6091920 | 0.8192650  |
| C | 14.1031850  | -3.4313060 | 0.5013150  |
| H | 14.3492070  | -4.4623030 | 0.1982160  |
| H | 13.6872830  | -2.8926680 | -0.3582750 |
| C | 13.1107000  | -3.5068810 | 1.6577430  |
| H | 12.2846650  | -4.1809910 | 1.4012880  |
| H | 13.6215630  | -3.8900290 | 2.5434530  |
| C | 3.1810240   | -3.1667310 | -0.0058600 |
| C | 2.1725500   | -3.8519530 | -0.0664790 |
| C | -4.6333540  | -0.5211430 | -0.4403240 |
| C | -4.7210160  | 0.6951710  | -0.4955070 |
| O | -10.0007300 | 8.4191130  | -2.4861760 |
| C | -11.1165050 | 8.4948990  | -1.5561150 |
| H | -10.7950940 | 9.0009190  | -0.6375910 |
| H | -11.4742020 | 7.4843170  | -1.3093830 |
| C | -12.2567570 | 9.2417460  | -2.2390920 |
| H | -12.3858100 | 8.8469120  | -3.2490140 |
| H | -13.1808760 | 9.0666680  | -1.6636030 |
| O | -12.0427070 | 10.6574880 | -2.4140650 |
| C | -12.1421970 | 11.4556170 | -1.2115190 |
| H | -11.4876530 | 11.0834920 | -0.4153080 |
| H | -13.1790400 | 11.4579250 | -0.8391460 |
| C | -11.7635800 | 12.8744000 | -1.5951170 |
| H | -12.3532020 | 13.1944180 | -2.4626770 |
| H | -11.9445630 | 13.5498830 | -0.7490810 |
| O | -10.3559900 | 12.9081990 | -1.9571380 |
| C | -9.8429990  | 14.1693640 | -2.4669630 |
| H | -10.6196210 | 14.6352690 | -3.0858340 |
| H | -8.9848200  | 13.9150000 | -3.0911390 |
| C | -9.3893320  | 15.0983280 | -1.3493880 |

|   |             |             |            |
|---|-------------|-------------|------------|
| H | -9.3341150  | 16.1334230  | -1.7232840 |
| H | -10.1086800 | 15.0709310  | -0.5148770 |
| O | -8.0918810  | 14.6503820  | -0.9220820 |
| C | -7.6798930  | 15.2098530  | 0.3537530  |
| H | -8.3810870  | 14.8688750  | 1.1267070  |
| H | -7.6776650  | 16.3090140  | 0.3027330  |
| C | -6.2919530  | 14.7093060  | 0.6858940  |
| H | -6.1140000  | 14.7941810  | 1.7690080  |
| H | -6.2039980  | 13.6589960  | 0.3939840  |
| O | -5.3227610  | 15.5325890  | -0.0237770 |
| C | -3.9496660  | 15.1410130  | 0.1726030  |
| H | -3.6811690  | 15.1573700  | 1.2401860  |
| H | -3.3687820  | 15.9038650  | -0.3516160 |
| C | -3.6086020  | 13.7628580  | -0.3925960 |
| H | -4.2657530  | 13.5379940  | -1.2420720 |
| H | -2.5596590  | 13.7378400  | -0.7185150 |
| O | -3.8041680  | 12.7768550  | 0.6612380  |
| C | 1.4628890   | 4.8284650   | -0.2351970 |
| C | 2.5619290   | 4.2994210   | -0.1874370 |
| O | 12.2205860  | 4.9448000   | -1.0193680 |
| O | 15.7463240  | 4.3586940   | -1.7960550 |
| O | 17.4344590  | 1.8740690   | -3.3373440 |
| O | 15.3058580  | -2.7632690  | 0.9769040  |
| O | 12.5958540  | -2.2095420  | 2.0628960  |
| C | 17.2056850  | 1.2495130   | -2.0492050 |
| H | 16.3133160  | 1.6742800   | -1.5887890 |
| H | 18.0775640  | 1.4003200   | -1.3944600 |
| C | 16.9783290  | -0.2324770  | -2.3136070 |
| H | 17.8463210  | -0.6654450  | -2.8301460 |
| H | 16.0826230  | -0.3645270  | -2.9330790 |
| H | 15.6417570  | -2.4897180  | -1.7413320 |
| O | 16.7928880  | -0.8989800  | -1.0253720 |
| C | -2.9236260  | -13.0046880 | -2.6763190 |

|   |             |             |            |
|---|-------------|-------------|------------|
| H | -2.1589210  | -12.7878480 | -3.4334600 |
| H | -3.8764250  | -12.5613400 | -2.9812370 |
| C | -3.0938270  | -14.5151570 | -2.4969300 |
| H | -2.7585930  | -15.0363990 | -3.4049190 |
| H | -2.4925120  | -14.8528180 | -1.6504740 |
| C | -5.4105160  | -14.6512040 | -3.2814120 |
| H | -4.8558940  | -14.5410080 | -4.2254210 |
| H | -5.9316910  | -13.7120810 | -3.0611000 |
| C | -6.4159110  | -15.7906560 | -3.4455850 |
| H | -6.7858800  | -15.7889430 | -4.4743160 |
| H | -5.9210860  | -16.7523320 | -3.2470370 |
| C | -9.1908400  | -13.2285040 | -1.3146560 |
| H | -9.4399720  | -13.8354510 | -2.1935870 |
| C | -10.4582640 | -12.5632600 | -0.7720820 |
| H | -11.0710230 | -12.2272400 | -1.6266970 |
| H | -11.0318790 | -13.2962070 | -0.1973750 |
| C | -9.9788920  | -10.1814210 | -0.5137390 |
| H | -10.8085140 | -9.9428400  | -1.2011960 |
| H | -9.0375330  | -10.2110240 | -1.0728520 |
| C | -9.9316760  | -9.1120930  | 0.5751610  |
| H | -10.1408340 | -8.1226610  | 0.1494400  |
| H | -10.6946000 | -9.3438660  | 1.3203440  |
| O | -2.4948850  | -12.4370720 | -1.4086910 |
| O | -4.4583990  | -14.9320710 | -2.2036630 |
| O | -7.6073160  | -15.6427830 | -2.6372350 |
| O | -10.2423110 | -11.4534070 | 0.1316200  |
| O | -8.6895400  | -9.0835390  | 1.3210040  |
| C | -7.4895900  | -16.0751220 | -1.2621920 |
| H | -6.5495750  | -15.7153280 | -0.8268980 |
| H | -7.4989200  | -17.1757970 | -1.2134220 |
| C | -8.6818250  | -15.5096000 | -0.4974370 |
| H | -8.7232870  | -15.9543740 | 0.5018310  |
| H | -9.6080440  | -15.7628750 | -1.0303640 |



|   |            |             |            |
|---|------------|-------------|------------|
| H | -8.4487170 | -12.4835400 | -1.6051620 |
| O | -8.5669100 | -14.0809960 | -0.3023980 |
| C | -8.7921040 | 7.9498560   | -1.9877990 |
| C | -6.2530870 | 7.0402520   | -1.1047560 |
| C | -7.6222390 | 8.6028240   | -2.4051400 |
| H | -7.7153690 | 9.4695760   | -3.0457410 |
| C | -6.3753500 | 8.1537010   | -1.9678620 |
| H | -5.4879590 | 8.6724370   | -2.3059590 |
| C | -8.6983160 | 6.8419210   | -1.1300790 |
| H | -9.5899360 | 6.3117680   | -0.8123210 |
| C | -7.4397290 | 6.3967320   | -0.7036950 |
| H | -7.3800360 | 5.5168810   | -0.0698720 |
| C | 0.1572980  | 5.4289930   | -0.3014140 |
| C | -2.4376790 | 6.5744690   | -0.4169580 |
| C | -0.7305820 | 5.0949710   | -1.3455140 |
| H | -0.4144170 | 4.3894570   | -2.1060370 |
| C | -2.0053590 | 5.6605520   | -1.3993730 |
| H | -2.6756210 | 5.3927170   | -2.2086770 |
| C | -0.2605080 | 6.3623130   | 0.6696120  |
| H | 0.4196500  | 6.6370950   | 1.4686770  |
| C | -1.5341540 | 6.9337920   | 0.6021740  |
| H | -1.8330070 | 7.6645470   | 1.3469480  |
| C | -3.7998740 | 7.1929600   | -0.4807970 |
| C | -4.2616180 | 9.1693450   | 1.0109720  |
| H | -4.6253690 | 8.4721510   | 1.7597140  |
| C | -4.2214040 | 10.5357590  | 1.2920700  |
| H | -4.5635870 | 10.9354110  | 2.2399660  |
| C | -3.8139060 | 8.6690530   | -0.2275730 |
| C | -3.2915300 | 9.5761520   | -1.1596280 |
| H | -2.9033670 | 9.2039370   | -2.1034330 |
| C | -3.2791140 | 10.9533090  | -0.9070070 |
| H | -2.9059660 | 11.6285930  | -1.6674690 |
| C | -3.7603870 | 11.4360820  | 0.3202550  |

|   |            |            |            |
|---|------------|------------|------------|
| C | -4.9236190 | 6.4600990  | -0.7357330 |
| C | -4.3946060 | 4.3068190  | 0.4668050  |
| H | -4.0361840 | 4.8995790  | 1.3022250  |
| C | -4.3483880 | 2.9123500  | 0.5335600  |
| H | -3.9591260 | 2.4198320  | 1.4178480  |
| C | -4.8847480 | 4.9618280  | -0.6782760 |
| C | -5.3575540 | 4.1786980  | -1.7483900 |
| H | -5.7605180 | 4.6694640  | -2.6289110 |
| C | -5.3046440 | 2.7834650  | -1.6944160 |
| H | -5.6557490 | 2.1902910  | -2.5318380 |
| C | -4.7941390 | 2.1304410  | -0.5522170 |
| C | 0.9592190  | -4.6225500 | -0.1272140 |
| C | -1.4706980 | -6.0803110 | -0.2754650 |
| C | -0.0575870 | -4.4244500 | 0.8308700  |
| H | 0.0939190  | -3.6997380 | 1.6233950  |
| C | -1.2505580 | -5.1443030 | 0.7553350  |
| H | -2.0264900 | -4.9790880 | 1.4951690  |
| C | 0.7567100  | -5.5799670 | -1.1427730 |
| H | 1.5373690  | -5.7478900 | -1.8770320 |
| C | -0.4372250 | -6.3044280 | -1.2058960 |
| H | -0.5788060 | -7.0439630 | -1.9878570 |
| C | -7.5869730 | -8.3776760 | 0.8456610  |
| C | -5.2147430 | -7.0314210 | 0.1054430  |
| C | -6.4479890 | -8.4528090 | 1.6606040  |
| H | -6.4925680 | -9.0578750 | 2.5582600  |
| C | -5.2745630 | -7.8047640 | 1.2813490  |
| H | -4.3874010 | -7.9024770 | 1.8981740  |
| C | -7.5464700 | -7.6316910 | -0.3442520 |
| H | -8.4026930 | -7.5763290 | -1.0072370 |
| C | -6.3695880 | -6.9478700 | -0.6884900 |
| H | -6.3513120 | -6.3490850 | -1.5947530 |
| C | -3.9741320 | -6.2485900 | -0.1978420 |
| C | -3.5479610 | -4.0095410 | -1.2853700 |

|   |            |             |            |
|---|------------|-------------|------------|
| H | -2.9406930 | -4.5149960  | -2.0286560 |
| C | -3.7107260 | -2.6251210  | -1.3499920 |
| H | -3.2305760 | -2.0548320  | -2.1377080 |
| C | -4.1551220 | -4.7660020  | -0.2624730 |
| C | -4.9663920 | -4.0947410  | 0.6732400  |
| H | -5.4664660 | -4.6667090  | 1.4485090  |
| C | -5.1253190 | -2.7070000  | 0.6216140  |
| H | -5.7384360 | -2.1997960  | 1.3589280  |
| C | -4.4926480 | -1.9517660  | -0.3877120 |
| C | -2.7532490 | -6.8425610  | -0.3555750 |
| C | -3.2511930 | -8.8177500  | -1.8043540 |
| H | -3.8374840 | -8.1550800  | -2.4327550 |
| C | -3.1611060 | -10.1723390 | -2.1378020 |
| H | -3.6989090 | -10.5331370 | -3.0032780 |
| C | -2.6269240 | -8.3004720  | -0.6594850 |
| C | -1.8445380 | -9.1713410  | 0.1233300  |
| H | -1.3136340 | -8.7827620  | 0.9873620  |
| C | -1.7700990 | -10.5329280 | -0.1782750 |
| H | -1.2122600 | -11.2181210 | 0.4505350  |
| C | -2.4674480 | -11.0395910 | -1.2844710 |
| C | 11.0880550 | 4.1488480   | -0.8575290 |
| C | 8.8622530  | 2.5138630   | -0.2562660 |
| C | 10.8470720 | 2.9878400   | -1.6042040 |
| H | 11.5206710 | 2.6677760   | -2.3887760 |
| C | 9.7481530  | 2.1771200   | -1.2890640 |
| H | 9.5984760  | 1.2576900   | -1.8440400 |
| C | 10.1763830 | 4.5382490   | 0.1404250  |
| H | 10.3647150 | 5.4513860   | 0.6933440  |
| C | 9.0739510  | 3.7320920   | 0.4272040  |
| H | 8.3760570  | 4.0368690   | 1.2016420  |
| C | 4.3465290  | -2.3255770  | 0.0530410  |
| C | 6.6029730  | -0.6115570  | 0.1898230  |
| C | 4.6168510  | -1.4086180  | -0.9845100 |

|   |            |             |            |
|---|------------|-------------|------------|
| H | 3.9467290  | -1.3575720  | -1.8356160 |
| C | 5.7284500  | -0.5671510  | -0.9137290 |
| H | 5.9215520  | 0.1389480   | -1.7143260 |
| C | 5.2339970  | -2.3921580  | 1.1474450  |
| H | 5.0397100  | -3.1006880  | 1.9455180  |
| C | 6.3507620  | -1.5539140  | 1.2057210  |
| H | 7.0295740  | -1.6194780  | 2.0504630  |
| C | 7.7882660  | 0.2989830   | 0.2637410  |
| C | 9.8080720  | 0.1291620   | 1.7564650  |
| H | 9.4836380  | 1.0388980   | 2.2504760  |
| C | 10.9436020 | -0.5374360  | 2.2153170  |
| H | 11.4993270 | -0.1700400  | 3.0685100  |
| C | 9.0681210  | -0.3667000  | 0.6646830  |
| C | 9.5056920  | -1.5589880  | 0.0609310  |
| H | 8.9428130  | -1.9694380  | -0.7714760 |
| C | 10.6667200 | -2.2200610  | 0.4868380  |
| H | 11.0062090 | -3.0971610  | -0.0521020 |
| C | 11.3908670 | -1.6979320  | 1.5666960  |
| C | 7.6805580  | 1.6413030   | 0.0235320  |
| C | 5.3850730  | 2.1167980   | 0.9717300  |
| H | 5.6032560  | 1.4314420   | 1.7837820  |
| C | 4.1487600  | 2.7632830   | 0.9256420  |
| H | 3.4080620  | 2.5809520   | 1.6965460  |
| C | 6.3555210  | 2.3339940   | -0.0265400 |
| C | 6.0627540  | 3.2496230   | -1.0558660 |
| H | 6.8104670  | 3.4497150   | -1.8169170 |
| C | 4.8232280  | 3.8925380   | -1.1147810 |
| H | 4.6037300  | 4.5830100   | -1.9219870 |
| C | 3.8457350  | 3.6528720   | -0.1265390 |
| C | -2.9958630 | -13.7054870 | 3.1760720  |
| C | -4.2299050 | -14.5245190 | 3.6311640  |
| C | -4.9749670 | -13.5224060 | 1.7190200  |
| C | -3.5115740 | -12.9831860 | 1.8923960  |

|   |            |             |            |
|---|------------|-------------|------------|
| H | -2.6819870 | -12.9957010 | 3.9469380  |
| H | -2.1397660 | -14.3510510 | 2.9631970  |
| H | -3.5010050 | -11.8958850 | 1.9730720  |
| H | -2.9311010 | -13.2309820 | 0.9987290  |
| C | -4.8534670 | -14.9946670 | 2.2724540  |
| C | -5.2798070 | -13.5101260 | 4.1520540  |
| H | -6.1214990 | -13.9803770 | 4.6692490  |
| H | -4.8632100 | -12.7535730 | 4.8233500  |
| C | -5.7700280 | -12.8778590 | 2.8505700  |
| H | -4.0075790 | -15.3314220 | 4.3319190  |
| C | -6.2118950 | -15.7118130 | 2.4276660  |
| H | -6.5373920 | -16.1144280 | 1.4628880  |
| H | -6.1109660 | -16.5550550 | 3.1202150  |
| H | -7.0153370 | -15.0646290 | 2.7943900  |
| C | -3.9358960 | -15.8967710 | 1.4281770  |
| H | -3.8337610 | -16.8736730 | 1.9150610  |
| H | -4.3649030 | -16.0602370 | 0.4320690  |
| H | -2.9340270 | -15.4854560 | 1.2879790  |
| O | -6.6692520 | -12.0320470 | 2.7308380  |
| C | -5.6017570 | -13.4283420 | 0.3530460  |
| H | -5.0052970 | -13.9166860 | -0.4261210 |
| H | -6.6461710 | -13.7656970 | 0.3223010  |
| S | -5.7689500 | -11.6709690 | -0.2756060 |
| O | -4.7775160 | -10.6653990 | 0.4721990  |
| O | -5.8050350 | -11.7254560 | -1.8880720 |
| O | -7.4028420 | -11.2507220 | 0.1005290  |
| H | -7.5689430 | -11.2740940 | 1.0777020  |
| C | 16.1719600 | 3.2154840   | 2.1134740  |
| C | 15.2473370 | 2.7130510   | 3.2467960  |
| C | 14.6275110 | 1.3900960   | 1.4815920  |
| C | 15.7211070 | 2.3503260   | 0.8981850  |
| H | 16.0424000 | 4.2851640   | 1.9272240  |
| H | 17.2258560 | 3.0516190   | 2.3521990  |

|   |            |            |            |
|---|------------|------------|------------|
| H | 15.3620440 | 2.9433420  | 0.0554510  |
| H | 16.5426770 | 1.7390020  | 0.5214430  |
| C | 15.1518480 | 1.1734620  | 2.9652320  |
| C | 13.8196820 | 3.2121900  | 2.9058750  |
| H | 13.1051590 | 3.1125210  | 3.7273700  |
| H | 13.7877270 | 4.2541840  | 2.5732180  |
| C | 13.4281150 | 2.2785160  | 1.7677590  |
| H | 15.5776170 | 2.9684700  | 4.2550140  |
| C | 14.1594000 | 0.4350700  | 3.8853890  |
| H | 13.9990630 | -0.5939130 | 3.5460170  |
| H | 14.5694890 | 0.3955910  | 4.9005690  |
| H | 13.1800180 | 0.9191340  | 3.9475930  |
| C | 16.4886670 | 0.4129430  | 3.0268070  |
| H | 16.8950470 | 0.4718210  | 4.0429820  |
| H | 16.3264070 | -0.6446920 | 2.7891330  |
| H | 17.2459580 | 0.7959380  | 2.3396730  |
| O | 12.3187780 | 2.2397630  | 1.2096170  |
| C | 14.4096710 | 0.0884650  | 0.7462800  |
| H | 15.3595220 | -0.3910310 | 0.5026110  |
| H | 13.7621680 | -0.6144530 | 1.2748350  |
| S | 13.6147710 | 0.1858590  | -0.9609010 |
| O | 14.1358860 | 1.4791160  | -1.7632880 |
| O | 13.7181230 | -1.2293580 | -1.7137530 |
| O | 11.9289880 | 0.3760590  | -0.6635430 |
| H | 11.8033300 | 1.1204880  | -0.0001110 |
| C | -7.9905930 | 9.9180790  | 4.8185200  |
| C | -8.9381560 | 8.7417000  | 4.4923500  |
| C | -8.4495730 | 9.5671020  | 2.4137030  |
| C | -7.7264880 | 10.5352970 | 3.4115350  |
| H | -8.4552390 | 10.6351700 | 5.5010570  |
| H | -7.0675570 | 9.5700970  | 5.2899440  |
| H | -8.1095360 | 11.5507190 | 3.3083840  |
| H | -6.6595080 | 10.5721550 | 3.1710580  |

|   |             |            |            |
|---|-------------|------------|------------|
| C | -8.3380490  | 8.1721820  | 3.1607290  |
| C | -10.2843060 | 9.3548630  | 4.0242110  |
| H | -11.1133360 | 8.6420670  | 4.0111850  |
| H | -10.5970720 | 10.2131200 | 4.6269910  |
| C | -9.9533270  | 9.7839090  | 2.5910220  |
| H | -9.0406870  | 8.0048640  | 5.2912640  |
| C | -9.1919820  | 7.0467770  | 2.5398900  |
| H | -8.7518630  | 6.7170620  | 1.5952840  |
| H | -9.2122230  | 6.1875800  | 3.2199040  |
| H | -10.2275250 | 7.3348290  | 2.3343990  |
| C | -6.8981820  | 7.6457000  | 3.2809800  |
| H | -6.8676910  | 6.8190750  | 4.0002710  |
| H | -6.5564480  | 7.2568660  | 2.3139400  |
| H | -6.1839540  | 8.4039610  | 3.6117340  |
| O | -10.7681000 | 10.1050170 | 1.7174870  |
| C | -7.9587670  | 9.5767730  | 0.9875160  |
| H | -6.9065080  | 9.3022900  | 0.8878370  |
| H | -8.5783980  | 8.9744880  | 0.3245520  |
| S | -8.0181140  | 11.2924920 | 0.2008260  |
| O | -8.6613990  | 12.3859450 | 1.2049100  |
| O | -6.5598930  | 11.6152890 | -0.3999370 |
| O | -9.1016410  | 10.9473620 | -1.0712120 |
| H | -9.5370030  | 11.7909220 | -1.5002990 |

***PPP→3S***

|   | X         | Y          | Z          |
|---|-----------|------------|------------|
| C | 1.7241970 | 13.7955320 | -1.9158160 |
| H | 1.8381010 | 13.7896730 | -3.0080390 |
| H | 2.6546790 | 13.4602490 | -1.4497810 |
| C | 1.3764330 | 15.1870040 | -1.3727370 |
| H | 0.6302790 | 15.6869800 | -2.0071200 |
| H | 0.9910190 | 15.0630330 | -0.3631210 |
| C | 3.2668060 | 16.3331650 | -2.4466540 |

|   |             |            |            |
|---|-------------|------------|------------|
| H | 2.5718320   | 16.6590080 | -3.2395290 |
| H | 3.8072870   | 15.4449850 | -2.8001240 |
| C | 4.2477350   | 17.4678430 | -2.1645280 |
| H | 4.7776820   | 17.7208200 | -3.0876270 |
| H | 3.6903880   | 18.3506870 | -1.8194870 |
| C | 7.8228530   | 15.4358060 | 0.5964940  |
| H | 8.5109080   | 16.2923520 | 0.5253230  |
| C | 8.4874620   | 14.3621830 | 1.4532240  |
| H | 9.5172650   | 14.1945970 | 1.1084830  |
| H | 8.5070810   | 14.6971300 | 2.4926010  |
| C | 8.1580050   | 12.0653640 | 0.5133600  |
| H | 8.9859210   | 12.4177130 | -0.1159720 |
| H | 7.2981380   | 11.8523120 | -0.1276910 |
| C | 8.5943360   | 10.8162840 | 1.2793520  |
| H | 8.9880260   | 10.0682460 | 0.5789910  |
| H | 9.3786290   | 11.0726580 | 1.9938080  |
| C | 4.4949190   | 1.4976080  | 0.1422960  |
| C | 4.7313990   | 0.3003240  | 0.1166690  |
| C | -0.9395290  | -4.6924250 | -0.0542740 |
| C | -2.0939650  | -4.2990160 | -0.1028880 |
| O | -11.6035110 | -5.7340000 | -1.8231230 |
| C | -12.3460230 | -6.4985610 | -0.8397260 |
| H | -12.6203770 | -5.8545750 | 0.0061300  |
| H | -11.7147630 | -7.3180330 | -0.4664460 |
| C | -13.5931330 | -7.0982010 | -1.4911500 |
| H | -13.3426920 | -7.4562960 | -2.4915560 |
| H | -13.9060580 | -7.9545480 | -0.8702870 |
| O | -14.7133740 | -6.2047720 | -1.6682020 |
| C | -15.1866130 | -5.5999570 | -0.4354830 |
| H | -14.6599340 | -4.6560100 | -0.2724560 |
| H | -14.9866320 | -6.2727940 | 0.4127800  |
| C | -16.6793870 | -5.3150220 | -0.4844280 |
| H | -17.1955330 | -6.1070650 | -1.0444440 |



|   |             |            |            |
|---|-------------|------------|------------|
| H | -17.0495740 | -5.3028140 | 0.5509300  |
| O | -16.9165360 | -4.0280530 | -1.1077690 |
| C | -18.1869990 | -3.4171100 | -0.7808760 |
| H | -18.9969780 | -4.1617660 | -0.8302260 |
| H | -18.3554190 | -2.6616360 | -1.5516070 |
| C | -18.2123300 | -2.7382920 | 0.5882570  |
| H | -19.2545480 | -2.4785730 | 0.8355310  |
| H | -17.8193020 | -3.4040640 | 1.3705070  |
| O | -17.4047840 | -1.5407590 | 0.5205970  |
| C | -17.3053830 | -0.8264670 | 1.7768200  |
| H | -17.2361250 | -1.5451930 | 2.6056510  |
| H | -18.1920710 | -0.1918440 | 1.9134550  |
| C | -16.0505110 | 0.0279650  | 1.7992980  |
| H | -15.9075740 | 0.4220650  | 2.8187910  |
| H | -15.1790680 | -0.5783640 | 1.5369750  |
| O | -16.2001470 | 1.1284590  | 0.8712110  |
| C | -15.1260670 | 2.0898430  | 0.8778660  |
| H | -14.8850530 | 2.4097500  | 1.9034190  |
| H | -15.5268070 | 2.9446140  | 0.3274510  |
| C | -13.8378090 | 1.6332660  | 0.1919930  |
| H | -14.0617250 | 0.9305780  | -0.6208330 |
| H | -13.3197170 | 2.5144140  | -0.2096750 |
| O | -12.9747710 | 0.9870900  | 1.1774410  |
| C | -3.5710070  | 3.2048570  | -0.0580350 |
| C | -2.6493500  | 4.0050080  | -0.0516760 |
| O | 0.6290540   | 12.9095970 | -1.5404020 |
| O | 2.5473250   | 16.0393980 | -1.2304930 |
| O | 5.2829840   | 17.1347450 | -1.2026870 |
| O | 7.7712810   | 13.1002030 | 1.4589670  |
| O | 7.5290730   | 10.2764510 | 2.0966090  |
| C | -13.6193500 | -1.5398690 | -2.7205300 |
| C | -14.7381210 | -1.7062570 | -1.8929310 |
| C | -14.5773010 | -2.0591410 | -0.5495340 |

|   |             |            |            |
|---|-------------|------------|------------|
| C | -13.2956750 | -2.2574290 | -0.0133090 |
| C | -12.1785960 | -2.1080230 | -0.8458620 |
| C | -12.3409380 | -1.7475370 | -2.1892500 |
| H | -13.7416720 | -1.2705640 | -3.7646150 |
| H | -15.7434430 | -1.5844060 | -2.2765100 |
| H | -15.4731660 | -2.1833700 | 0.0445270  |
| H | -11.1685570 | -2.2489050 | -0.4783930 |
| H | -11.4604730 | -1.6275270 | -2.8113030 |
| C | -13.1255860 | -2.5382330 | 1.4835560  |
| C | -14.1099990 | -3.5916340 | 2.0230280  |
| O | -15.3174670 | -3.4055360 | 2.1673930  |
| O | -13.5159770 | -4.7771870 | 2.3398730  |
| H | -12.5368850 | -4.6581880 | 2.2599430  |
| O | -11.8273260 | -3.0766520 | 1.8356220  |
| H | -11.0876590 | -2.5555320 | 1.4754420  |
| H | -13.3047830 | -1.6092790 | 2.0396740  |
| C | 5.6860540   | 12.1258590 | -2.7009500 |
| C | 5.7486780   | 13.4793000 | -2.3316560 |
| C | 5.3176650   | 13.8809410 | -1.0603760 |
| C | 4.8239110   | 12.9414490 | -0.1422350 |
| C | 4.7345360   | 11.5943300 | -0.5249350 |
| C | 5.1705300   | 11.1897320 | -1.7941200 |
| H | 6.0243200   | 11.8077850 | -3.6820430 |
| H | 6.1331840   | 14.2223520 | -3.0239740 |
| H | 5.3603380   | 14.9297340 | -0.7953770 |
| H | 4.3189990   | 10.8601440 | 0.1560850  |
| H | 5.1001930   | 10.1432470 | -2.0681870 |
| C | 4.4553480   | 13.3820900 | 1.2657500  |
| C | 3.0207880   | 12.9936750 | 1.6682350  |
| O | 2.0118320   | 13.4598970 | 1.1407450  |
| O | 2.9740850   | 12.0965640 | 2.6870900  |
| H | 3.9121940   | 11.9338530 | 2.9688910  |
| O | 5.2944580   | 12.7614470 | 2.2645500  |

|   |            |             |            |
|---|------------|-------------|------------|
| H | 6.2631950  | 12.9026580  | 2.0806090  |
| H | 4.5352740  | 14.4703470  | 1.3301160  |
| C | 4.8983000  | 17.3079940  | 0.1900640  |
| H | 4.1413930  | 16.5678230  | 0.4689230  |
| H | 4.4610260  | 18.3097770  | 0.3248450  |
| C | 6.1383800  | 17.2014330  | 1.0630650  |
| H | 5.8930510  | 17.5732720  | 2.0634980  |
| H | 6.9385310  | 17.8223570  | 0.6378580  |
| H | 7.6198340  | 15.0652300  | -0.4159000 |
| O | 6.5941880  | 15.8325400  | 1.2479030  |
| C | 11.2142050 | -8.2510340  | -1.7686590 |
| H | 11.2089080 | -8.3134470  | -2.8650100 |
| H | 10.4437540 | -8.9110920  | -1.3609670 |
| C | 12.5677420 | -8.6486360  | -1.1671070 |
| H | 13.4010230 | -8.2230220  | -1.7447170 |
| H | 12.5950640 | -8.2858750  | -0.1419510 |
| C | 12.7001450 | -10.8203690 | -2.3095980 |
| H | 13.3643500 | -10.3466470 | -3.0526880 |
| H | 11.6812200 | -10.8447580 | -2.7184850 |
| C | 13.1966310 | -12.2400440 | -2.0501880 |
| H | 13.2084950 | -12.7931890 | -2.9940250 |
| H | 14.2191840 | -12.1981550 | -1.6481190 |
| C | 9.5305750  | -14.4511370 | 0.4455930  |
| H | 9.9497930  | -15.4638850 | 0.3426040  |
| C | 8.2357540  | -14.5518040 | 1.2468570  |
| H | 7.6046840  | -15.3522800 | 0.8364420  |
| H | 8.4770120  | -14.7824000 | 2.2868150  |
| C | 6.4233600  | -13.1033680 | 0.3048100  |
| H | 6.3368570  | -13.9785580 | -0.3526920 |
| H | 6.6900350  | -12.2342690 | -0.3029040 |
| C | 5.0968020  | -12.8797980 | 1.0313560  |
| H | 4.2776100  | -12.8277100 | 0.3024330  |
| H | 4.9038030  | -13.7082300 | 1.7152300  |

|   |             |             |            |
|---|-------------|-------------|------------|
| O | 10.9601840  | -6.8741930  | -1.3639170 |
| O | 12.7305270  | -10.0912310 | -1.0643550 |
| O | 12.3503020  | -13.0130430 | -1.1590280 |
| O | 7.4783070   | -13.3143830 | 1.2833930  |
| O | 5.1284140   | -11.7119520 | 1.8851910  |
| C | 7.8439590   | -10.8849050 | -2.8072860 |
| C | 8.9870790   | -11.5990170 | -2.4132300 |
| C | 9.4892940   | -11.4584680 | -1.1126190 |
| C | 8.8591490   | -10.6095480 | -0.1897760 |
| C | 7.7347870   | -9.8746710  | -0.5958110 |
| C | 7.2269470   | -10.0186640 | -1.8943010 |
| H | 7.4465510   | -10.9945610 | -3.8113690 |
| H | 9.4868160   | -12.2667090 | -3.1087310 |
| H | 10.3774530  | -12.0083570 | -0.8279620 |
| H | 7.2581140   | -9.1845290  | 0.0908710  |
| H | 6.3527700   | -9.4478140  | -2.1866220 |
| C | 9.3607040   | -10.5472900 | 1.2444640  |
| C | 9.6970760   | -9.1188960  | 1.7121970  |
| O | 10.6038410  | -8.4382580  | 1.2348000  |
| O | 8.9077880   | -8.6885210  | 2.7300610  |
| H | 8.3045320   | -9.4423290  | 2.9626190  |
| O | 8.3715400   | -11.0145320 | 2.1873270  |
| H | 8.0322350   | -11.9232640 | 1.9608850  |
| H | 10.2718140  | -11.1455990 | 1.3274160  |
| C | 12.6165440  | -12.8146310 | 0.2577760  |
| H | 12.3296010  | -11.8019060 | 0.5587920  |
| H | 13.6952960  | -12.9330850 | 0.4454010  |
| C | 11.8695210  | -13.8721010 | 1.0547580  |
| H | 12.2608500  | -13.8784240 | 2.0775790  |
| H | 12.0395690  | -14.8581360 | 0.6015500  |
| H | 9.3454820   | -14.0455740 | -0.5566560 |
| O | 10.4455450  | -13.6010240 | 1.1746400  |
| C | -10.5529030 | -4.9445660  | -1.3856490 |

|   |             |            |            |
|---|-------------|------------|------------|
| C | -8.5294760  | -3.1145470 | -0.6412070 |
| C | -10.0128810 | -4.0641420 | -2.3379160 |
| H | -10.4211880 | -4.0787740 | -3.3411110 |
| C | -9.0293480  | -3.1502890 | -1.9613100 |
| H | -8.6439000  | -2.4437430 | -2.6907360 |
| C | -10.0302540 | -4.9621410 | -0.0817730 |
| H | -10.4033610 | -5.6550330 | 0.6630050  |
| C | -9.0162820  | -4.0571210 | 0.2746510  |
| H | -8.6114990  | -4.0828410 | 1.2821770  |
| C | -4.6243240  | 2.2256370  | -0.0770190 |
| C | -6.6461800  | 0.2361030  | -0.0837010 |
| C | -4.6527080  | 1.2324200  | -1.0791620 |
| H | -3.8853720  | 1.2302110  | -1.8453930 |
| C | -5.6492540  | 0.2561910  | -1.0801270 |
| H | -5.6544640  | -0.5044080 | -1.8534410 |
| C | -5.6389190  | 2.2295300  | 0.9020190  |
| H | -5.6344650  | 2.9977050  | 1.6676400  |
| C | -6.6406660  | 1.2540720  | 0.8890750  |
| H | -7.4192190  | 1.2775800  | 1.6451480  |
| C | -7.7058240  | -0.8189240 | -0.0891400 |
| C | -9.6746280  | -0.5634800 | 1.4471660  |
| H | -9.1089240  | -1.1146260 | 2.1937600  |
| C | -10.9456570 | -0.0742180 | 1.7648050  |
| H | -11.3807760 | -0.2383290 | 2.7445310  |
| C | -9.0963370  | -0.3278790 | 0.1823400  |
| C | -9.8200530  | 0.4432030  | -0.7385340 |
| H | -9.3825920  | 0.6646220  | -1.7069050 |
| C | -11.1125120 | 0.9050400  | -0.4499910 |
| H | -11.6650930 | 1.4346660  | -1.2159140 |
| C | -11.6879540 | 0.6278540  | 0.8008030  |
| C | -7.4412710  | -2.1393490 | -0.3020110 |
| C | -5.1737670  | -2.3542030 | 0.7855240  |
| H | -5.4986240  | -1.6523370 | 1.5460000  |

|   |            |             |            |
|---|------------|-------------|------------|
| C | -3.8831280 | -2.8807710  | 0.8402030  |
| H | -3.2075260 | -2.5882680  | 1.6364140  |
| C | -6.0611250 | -2.7127980  | -0.2497800 |
| C | -5.6291500 | -3.6530830  | -1.2047740 |
| H | -6.3082680 | -3.9711050  | -1.9893350 |
| C | -4.3333910 | -4.1767310  | -1.1619530 |
| H | -4.0066420 | -4.8864800  | -1.9141960 |
| C | -3.4385820 | -3.7895970  | -0.1436510 |
| C | 4.9759030  | -1.1172620  | 0.0945920  |
| C | 5.3987520  | -3.9205940  | 0.0273460  |
| C | 4.4237530  | -1.9511710  | 1.0898030  |
| H | 3.8281300  | -1.5102910  | 1.8815800  |
| C | 4.6344240  | -3.3302710  | 1.0534620  |
| H | 4.2013190  | -3.9611490  | 1.8223790  |
| C | 5.7647970  | -1.7004510  | -0.9187000 |
| H | 6.2051590  | -1.0658120  | -1.6801500 |
| C | 5.9807940  | -3.0811950  | -0.9419860 |
| H | 6.5997860  | -3.5168570  | -1.7200410 |
| C | 5.0158770  | -10.4275200 | 1.3537870  |
| C | 4.8263300  | -7.7319440  | 0.5189690  |
| C | 5.5472370  | -9.4017290  | 2.1503570  |
| H | 6.0169370  | -9.6743650  | 3.0870090  |
| C | 5.4708620  | -8.0732750  | 1.7274410  |
| H | 5.9041810  | -7.2891840  | 2.3394830  |
| C | 4.3777250  | -10.1119500 | 0.1447760  |
| H | 3.9525850  | -10.8822870 | -0.4888420 |
| C | 4.2719870  | -8.7689340  | -0.2488530 |
| H | 3.7408410  | -8.5256220  | -1.1645260 |
| C | 4.6015350  | -6.2898900  | 0.1797690  |
| C | 2.6869960  | -5.0743910  | -0.9312650 |
| H | 3.3793850  | -4.7359900  | -1.6946740 |
| C | 1.3461310  | -4.6926910  | -0.9950740 |
| H | 0.9965600  | -4.0596190  | -1.8032800 |

|   |            |            |            |
|---|------------|------------|------------|
| C | 3.1622010  | -5.8857600 | 0.1188080  |
| C | 2.2409840  | -6.3371430 | 1.0841020  |
| H | 2.5827980  | -6.9851540 | 1.8851900  |
| C | 0.8986590  | -5.9509420 | 1.0324150  |
| H | 0.2032870  | -6.2898400 | 1.7928000  |
| C | 0.4343940  | -5.1163230 | -0.0052500 |
| C | 5.6191080  | -5.3992300 | -0.0088790 |
| C | 7.2569710  | -6.6401440 | -1.4382080 |
| H | 6.4141860  | -6.9868170 | -2.0286840 |
| C | 8.5588480  | -6.9920510 | -1.8142590 |
| H | 8.7221840  | -7.6220290 | -2.6815740 |
| C | 7.0165270  | -5.8285430 | -0.3178500 |
| C | 8.1249080  | -5.3515440 | 0.4124760  |
| H | 7.9616750  | -4.7110730 | 1.2736140  |
| C | 9.4271310  | -5.7135060 | 0.0612030  |
| H | 10.2804560 | -5.4022890 | 0.6500070  |
| C | 9.6440730  | -6.5428870 | -1.0507670 |
| C | 0.9711280  | 11.6073270 | -1.1805820 |
| C | 1.6021750  | 8.9846140  | -0.3627790 |
| C | 1.8923950  | 10.8493940 | -1.9149350 |
| H | 2.3716070  | 11.2706100 | -2.7919060 |
| C | 2.2072920  | 9.5506860  | -1.4966740 |
| H | 2.9211200  | 8.9603600  | -2.0635840 |
| C | 0.3422140  | 11.0540210 | -0.0540170 |
| H | -0.3422580 | 11.6717970 | 0.5128900  |
| C | 0.6476610  | 9.7489380  | 0.3390960  |
| H | 0.1594160  | 9.3247020  | 1.2108500  |
| C | 4.1831770  | 2.9018900  | 0.1618900  |
| C | 3.5109620  | 5.6579800  | 0.2187280  |
| C | 3.4141930  | 3.4758040  | -0.8725650 |
| H | 3.0735740  | 2.8501450  | -1.6903130 |
| C | 3.0865230  | 4.8320900  | -0.8417130 |
| H | 2.4895780  | 5.2595200  | -1.6403530 |

|   |            |            |            |
|---|------------|------------|------------|
| C | 4.6324100  | 3.7296250  | 1.2118300  |
| H | 5.2327420  | 3.2999930  | 2.0065180  |
| C | 4.3087650  | 5.0893820  | 1.2307160  |
| H | 4.6679490  | 5.7156160  | 2.0415180  |
| C | 3.1563550  | 7.1112990  | 0.2419880  |
| C | 4.2065750  | 8.7733140  | 1.8110320  |
| H | 3.2831940  | 8.7726760  | 2.3807790  |
| C | 5.3025230  | 9.5051080  | 2.2720460  |
| H | 5.2635840  | 10.0670900 | 3.1967490  |
| C | 4.2847710  | 8.0217150  | 0.6188430  |
| C | 5.4950060  | 8.0371340  | -0.0931440 |
| H | 5.5886260  | 7.4376370  | -0.9939960 |
| C | 6.5907660  | 8.8004890  | 0.3382580  |
| H | 7.4999540  | 8.7992350  | -0.2525000 |
| C | 6.4929830  | 9.5345890  | 1.5298700  |
| C | 1.8928640  | 7.5606020  | -0.0132750 |
| C | 0.5214030  | 5.7022410  | 1.0087000  |
| H | 1.2500110  | 5.6373310  | 1.8096230  |
| C | -0.5806170 | 4.8463780  | 1.0051740  |
| H | -0.7079070 | 4.1167660  | 1.7973480  |
| C | 0.7077170  | 6.6490790  | -0.0183990 |
| C | -0.2682640 | 6.7419260  | -1.0293110 |
| H | -0.1572010 | 7.4891650  | -1.8087380 |
| C | -1.3690650 | 5.8807200  | -1.0455790 |
| H | -2.1053710 | 5.9505310  | -1.8389630 |
| C | -1.5348370 | 4.9146040  | -0.0319110 |

***MMM $\rightarrow$ 3D***

|   | X          | Y          | Z         |
|---|------------|------------|-----------|
| C | -5.5795790 | 12.4783330 | 0.5203260 |
| H | -4.5980460 | 12.9531870 | 0.6187300 |
| H | -5.8221150 | 11.9830170 | 1.4696130 |
| C | -6.6423750 | 13.5083090 | 0.1591880 |



|   |             |             |            |
|---|-------------|-------------|------------|
| H | -7.4646080  | 12.9959020  | -0.3609400 |
| H | -7.0282800  | 13.9817370  | 1.0643930  |
| C | -5.4880450  | 14.2515700  | -1.8853340 |
| H | -6.1023540  | 13.5274220  | -2.4393090 |
| H | -4.5066650  | 13.8032650  | -1.6833990 |
| C | -5.3351100  | 15.5289700  | -2.7040980 |
| H | -5.1204060  | 15.2769500  | -3.7454000 |
| H | -6.2766720  | 16.0955340  | -2.6539410 |
| C | -1.2710220  | 16.8619140  | -2.0185850 |
| H | -1.4348580  | 17.7282810  | -2.6709000 |
| C | 0.2258040   | 16.5940680  | -1.8817970 |
| H | 0.7316400   | 16.9147970  | -2.8049660 |
| H | 0.6241370   | 17.1510390  | -1.0331880 |
| C | 0.2612040   | 14.2684160  | -2.6785400 |
| H | 0.0756690   | 14.7983760  | -3.6254580 |
| H | -0.6420830  | 13.7180980  | -2.3947570 |
| C | 1.4677530   | 13.3580000  | -2.8869030 |
| H | 1.3176060   | 12.7243240  | -3.7715470 |
| H | 2.3591250   | 13.9713960  | -3.0308270 |
| C | 3.2520610   | 3.0639020   | -0.2818450 |
| C | 4.0133300   | 2.1164420   | -0.1686000 |
| C | 1.3179740   | -4.8868940  | -0.1057640 |
| C | 0.1131720   | -5.0772760  | -0.1537300 |
| O | -7.5827900  | -11.0251600 | 0.5683020  |
| C | -8.5962800  | -11.3004520 | 1.5749070  |
| H | -9.3688420  | -10.5252520 | 1.5658380  |
| H | -8.1130610  | -11.3165170 | 2.5622900  |
| C | -9.2101450  | -12.6612460 | 1.2659160  |
| H | -8.4446410  | -13.3263560 | 0.8623050  |
| H | -9.6159340  | -13.0971070 | 2.1918460  |
| O | -10.2478210 | -12.6041840 | 0.2540720  |
| C | -11.5157230 | -12.0778730 | 0.7161970  |
| H | -11.3802630 | -11.1748850 | 1.3249590  |

|   |             |             |            |
|---|-------------|-------------|------------|
| H | -12.0504110 | -12.8315880 | 1.3118640  |
| C | -12.2960520 | -11.7404390 | -0.5481830 |
| H | -11.7358810 | -11.0345530 | -1.1695260 |
| H | -12.5040750 | -12.6525650 | -1.1159070 |
| O | -13.5668610 | -11.1197040 | -0.1517690 |
| C | -14.6733100 | -11.3413780 | -1.0794000 |
| H | -15.1121880 | -12.3220960 | -0.8645980 |
| H | -14.2973430 | -11.3133180 | -2.1078000 |
| C | -15.6834280 | -10.2237130 | -0.9031920 |
| H | -16.6218750 | -10.4893710 | -1.4128650 |
| H | -15.9000150 | -10.0679030 | 0.1660230  |
| O | -15.0819960 | -9.0587100  | -1.4885900 |
| C | -15.7259890 | -7.7980500  | -1.1763080 |
| H | -15.8641910 | -7.7052330  | -0.0909210 |
| H | -16.6958830 | -7.7308990  | -1.6885360 |
| C | -14.8019150 | -6.6941030  | -1.6362000 |
| H | -15.1393690 | -5.7259370  | -1.2436370 |
| H | -13.8015610 | -6.9028140  | -1.2428270 |
| O | -14.7869270 | -6.6757020  | -3.0835360 |
| C | -13.7916590 | -5.8061560  | -3.6611080 |
| H | -13.9692030 | -4.7571630  | -3.3800930 |
| H | -13.9321610 | -5.9136370  | -4.7388180 |
| C | -12.3510890 | -6.1666100  | -3.2899510 |
| H | -12.2751610 | -7.2232370  | -3.0080800 |
| H | -11.6808770 | -5.9611340  | -4.1346470 |
| O | -11.9488050 | -5.3181760  | -2.1668330 |
| C | -4.5692580  | 0.7169300   | -0.7761540 |
| C | -4.1311590  | 1.8562240   | -0.7751870 |
| O | -5.5819120  | 11.4846230  | -0.5469000 |
| O | -6.1527770  | 14.6105490  | -0.6401740 |
| O | -4.2290210  | 16.3775110  | -2.3022410 |
| O | 0.5672830   | 15.2108630  | -1.6177250 |
| O | 1.7787430   | 12.5314280  | -1.7351220 |

|   |            |            |            |
|---|------------|------------|------------|
| C | -4.2802460 | 16.8415730 | -0.9292870 |
| H | -4.1923000 | 16.0026340 | -0.2329020 |
| H | -5.2414630 | 17.3399830 | -0.7337180 |
| C | -3.1473580 | 17.8314060 | -0.7231980 |
| H | -3.2431130 | 18.3020660 | 0.2579220  |
| H | -3.1573630 | 18.6018330 | -1.5026260 |
| H | -1.8204110 | 16.0084790 | -2.4256930 |
| O | -1.8283760 | 17.2005850 | -0.7087780 |
| C | 13.7236790 | -1.8477160 | 1.4003480  |
| H | 13.9559980 | -1.2618560 | 0.5056620  |
| H | 13.3556630 | -2.8239880 | 1.0910340  |
| C | 14.9455530 | -2.1115570 | 2.2795450  |
| H | 15.5195560 | -1.1960380 | 2.4786850  |
| H | 14.6166810 | -2.5459810 | 3.2242660  |
| C | 16.5183810 | -2.6651810 | 0.4822260  |
| H | 17.0763000 | -1.7483740 | 0.7288120  |
| H | 15.8191300 | -2.4695320 | -0.3401380 |
| C | 17.4934980 | -3.7498920 | 0.0514240  |
| H | 18.2205080 | -3.3119850 | -0.6494850 |
| H | 18.0292190 | -4.1437630 | 0.9241470  |
| C | 14.7073470 | -7.5589330 | -3.3225040 |
| H | 15.3097450 | -7.7348200 | -4.2279000 |
| C | 14.0905510 | -8.8927290 | -2.8921610 |
| H | 13.9515810 | -9.5145960 | -3.7907130 |
| H | 14.7798120 | -9.4033360 | -2.2163030 |
| C | 11.7290960 | -8.2771560 | -2.9666130 |
| H | 11.8308720 | -8.5999080 | -4.0168580 |
| H | 11.7743000 | -7.1870500 | -2.9200880 |
| C | 10.3889570 | -8.8200080 | -2.4760420 |
| H | 9.6111540  | -8.5011040 | -3.1849230 |
| H | 10.4310680 | -9.9112490 | -2.4525700 |
| O | 12.6852410 | -1.1777760 | 2.1804900  |
| O | 15.8011550 | -3.1197720 | 1.6629840  |

|   |            |             |            |
|---|------------|-------------|------------|
| O | 16.7555740 | -4.8138170  | -0.6016630 |
| O | 12.8275750 | -8.8255750  | -2.1844600 |
| O | 9.9911740  | -8.4526410  | -1.1294200 |
| C | 17.3895280 | -5.4944960  | -1.7083430 |
| H | 17.9128430 | -6.3930490  | -1.3566820 |
| H | 18.1175130 | -4.8264370  | -2.1936970 |
| C | 16.3354070 | -5.8765630  | -2.7365920 |
| H | 16.8378350 | -6.1201660  | -3.6861250 |
| H | 15.6540580 | -5.0296940  | -2.8989460 |
| H | 13.9371840 | -6.8101890  | -3.5432240 |
| O | 15.5933690 | -7.0431220  | -2.2844770 |
| C | -6.1055910 | -7.1430800  | -0.0989210 |
| C | -5.5808870 | -8.2717210  | -0.7619010 |
| H | -4.7836030 | -8.1421110  | -1.4877980 |
| C | -6.0885190 | -9.5485260  | -0.5176180 |
| H | -5.7112080 | -10.4169370 | -1.0450790 |
| C | -7.1195240 | -9.7269680  | 0.4226290  |
| C | -7.6122070 | -8.6219270  | 1.1376290  |
| H | -8.4044380 | -8.7286780  | 1.8657030  |
| C | -7.1079200 | -7.3462560  | 0.8620700  |
| H | -7.5093640 | -6.4895790  | 1.3956180  |
| C | -5.6097430 | -5.7687350  | -0.4057590 |
| C | -3.4302750 | -4.9271950  | -1.3751450 |
| H | -3.9824140 | -4.5318320  | -2.2209140 |
| C | -2.0449420 | -4.7661440  | -1.3180220 |
| H | -1.5225680 | -4.2459180  | -2.1133660 |
| C | -1.3106880 | -5.2696910  | -0.2236750 |
| C | -1.9998590 | -5.9595070  | 0.7955570  |
| H | -1.4425200 | -6.3614470  | 1.6348280  |
| C | -3.3855680 | -6.1273830  | 0.7249980  |
| H | -3.9039560 | -6.6714790  | 1.5083570  |
| C | -4.1263610 | -5.5931570  | -0.3470570 |
| C | -5.9759190 | -3.3202920  | -0.7366440 |

|   |             |            |            |
|---|-------------|------------|------------|
| C | -6.2445910  | -2.4763420 | -1.8316550 |
| H | -6.8096100  | -2.8630190 | -2.6741180 |
| C | -5.7858610  | -1.1563240 | -1.8515180 |
| H | -5.9855960  | -0.5210750 | -2.7077280 |
| C | -5.0580050  | -0.6359280 | -0.7606730 |
| C | -4.8124060  | -1.4695660 | 0.3502650  |
| H | -4.2594830  | -1.0770370 | 1.1966120  |
| C | -5.2668540  | -2.7898590 | 0.3582790  |
| H | -5.0646710  | -3.4240470 | 1.2149980  |
| C | -6.4539250  | -4.7389240 | -0.7192870 |
| C | -8.3062310  | -6.0143460 | -1.8871940 |
| H | -7.5760310  | -6.7423810 | -2.2204330 |
| C | -9.6418730  | -6.1827670 | -2.2637620 |
| H | -9.9278100  | -7.0492020 | -2.8451520 |
| C | -10.5976150 | -5.2412200 | -1.8529270 |
| C | -10.2089690 | -4.1495490 | -1.0610870 |
| H | -10.9591970 | -3.4168040 | -0.7849150 |
| C | -8.8731850  | -4.0064030 | -0.6752200 |
| H | -8.5825220  | -3.1495480 | -0.0748290 |
| C | -7.8924880  | -4.9377830 | -1.0788830 |
| C | 8.8458300   | -2.1996810 | 0.7400480  |
| C | 9.6336490   | -1.2556590 | 0.0551160  |
| H | 9.2486270   | -0.7971870 | -0.8504190 |
| C | 10.9062880  | -0.9051820 | 0.5205170  |
| H | 11.5230300  | -0.2002500 | -0.0262420 |
| C | 11.3906160  | -1.4783330 | 1.7049600  |
| C | 10.6064350  | -2.3887330 | 2.4235560  |
| H | 11.0007790  | -2.8143440 | 3.3367810  |
| C | 9.3477450   | -2.7557990 | 1.9315380  |
| H | 8.7416250   | -3.4705810 | 2.4790510  |
| C | 7.4419530   | -2.5005780 | 0.3201550  |
| C | 5.7111330   | -1.1421640 | -0.9197580 |
| H | 5.7001880   | -1.9067750 | -1.6890840 |

|   |            |            |            |
|---|------------|------------|------------|
| C | 4.8858350  | -0.0235470 | -1.0440130 |
| H | 4.2338190  | 0.0810890  | -1.9042880 |
| C | 4.8844370  | 0.9777320  | -0.0501430 |
| C | 5.7480150  | 0.8370760  | 1.0560310  |
| H | 5.7623040  | 1.6069710  | 1.8199950  |
| C | 6.5791090  | -0.2810650 | 1.1681690  |
| H | 7.2464860  | -0.3720000 | 2.0195340  |
| C | 6.5572650  | -1.2997790 | 0.1959190  |
| C | 5.5106470  | -4.0671400 | 0.0558620  |
| C | 4.9766640  | -4.8838610 | -0.9595880 |
| H | 5.6406440  | -5.3004810 | -1.7105830 |
| C | 3.6064970  | -5.1533170 | -1.0185300 |
| H | 3.2044240  | -5.7690890 | -1.8158780 |
| C | 2.7320810  | -4.6303550 | -0.0430300 |
| C | 3.2690610  | -3.8432630 | 0.9973450  |
| H | 2.6067330  | -3.4464320 | 1.7589330  |
| C | 4.6368000  | -3.5684410 | 1.0424300  |
| H | 5.0365210  | -2.9561630 | 1.8438040  |
| C | 6.9761990  | -3.7661420 | 0.1104640  |
| C | 8.7332890  | -4.9410560 | -1.2472660 |
| H | 8.8711300  | -4.0258250 | -1.8128470 |
| C | 9.4409020  | -6.0895480 | -1.6287400 |
| H | 10.1299730 | -6.0261280 | -2.4595880 |
| C | 9.2975600  | -7.2662760 | -0.8829380 |
| C | 8.4514730  | -7.2847650 | 0.2409100  |
| H | 8.3594000  | -8.2062410 | 0.8048850  |
| C | 7.7305990  | -6.1409200 | 0.5907440  |
| H | 7.0454610  | -6.1761320 | 1.4327510  |
| C | 7.8603420  | -4.9461440 | -0.1478590 |
| C | 0.4615600  | 6.2778500  | -0.6820450 |
| C | 1.5053180  | 6.1118740  | -1.6129660 |
| H | 1.5909330  | 6.8049930  | -2.4441750 |
| C | 2.4208120  | 5.0634100  | -1.4873830 |

|   |            |            |            |
|---|------------|------------|------------|
| H | 3.2100870  | 4.9357650  | -2.2203780 |
| C | 2.3280560  | 4.1589890  | -0.4086140 |
| C | 1.3044410  | 4.3429990  | 0.5443990  |
| H | 1.2306450  | 3.6590040  | 1.3827040  |
| C | 0.3882400  | 5.3876520  | 0.4066980  |
| H | -0.3992690 | 5.5140480  | 1.1420650  |
| C | -0.5305790 | 7.3871450  | -0.8339830 |
| C | -0.5146620 | 9.6097970  | -2.0467000 |
| H | -1.3958830 | 9.2992930  | -2.5961610 |
| C | 0.0192930  | 10.8797000 | -2.2898880 |
| H | -0.4702240 | 11.5256150 | -3.0083220 |
| C | 1.1605030  | 11.2942350 | -1.5853680 |
| C | 1.7600440  | 10.4290170 | -0.6562590 |
| H | 2.6675360  | 10.7489530 | -0.1573060 |
| C | 1.2058420  | 9.1706370  | -0.4145850 |
| H | 1.6812620  | 8.5084380  | 0.3023120  |
| C | 0.0485570  | 8.7405200  | -1.0953200 |
| C | -2.8603360 | 8.2856050  | -0.6305200 |
| C | -3.9789560 | 8.3412130  | -1.4867240 |
| H | -4.1435040 | 7.5428050  | -2.2042570 |
| C | -4.8669400 | 9.4159240  | -1.4355500 |
| H | -5.7213460 | 9.4756400  | -2.1000060 |
| C | -4.6616130 | 10.4491130 | -0.5047410 |
| C | -3.5795460 | 10.3932390 | 0.3890670  |
| H | -3.4017630 | 11.1811690 | 1.1123790  |
| C | -2.6921710 | 9.3131610  | 0.3128480  |
| H | -1.8439330 | 9.2779430  | 0.9893270  |
| C | -1.8768010 | 7.1670180  | -0.7409010 |
| C | -2.0636110 | 4.8411450  | -1.7175840 |
| H | -1.3131980 | 5.1112630  | -2.4527620 |
| C | -2.6134650 | 3.5581220  | -1.7303850 |
| H | -2.2913250 | 2.8335070  | -2.4701350 |
| C | -3.5857310 | 3.1874010  | -0.7778850 |

|   |            |            |            |
|---|------------|------------|------------|
| C | -4.0071720 | 4.1438730  | 0.1693590  |
| H | -4.7624520 | 3.8717930  | 0.8987930  |
| C | -3.4594770 | 5.4296330  | 0.1690420  |
| H | -3.7993000 | 6.1615110  | 0.8951030  |
| C | -2.4628160 | 5.7918570  | -0.7576710 |
| C | 2.1574480  | 15.9882170 | 3.3414340  |
| C | 2.1738130  | 14.6120900 | 4.0468530  |
| C | 0.6619560  | 14.3031590 | 2.3557270  |
| C | 1.1808390  | 15.7394660 | 2.1872920  |
| H | 1.8016480  | 16.7995990 | 3.9835920  |
| H | 3.1284990  | 16.2907000 | 2.9395440  |
| C | 1.9861710  | 13.6051390 | 2.8612260  |
| C | 0.8314690  | 14.4887390 | 4.8096990  |
| H | 0.8239270  | 13.6209410 | 5.4742310  |
| H | 0.6380150  | 15.3713790 | 5.4260520  |
| C | -0.2126980 | 14.3367850 | 3.6588150  |
| H | 3.0612800  | 14.4329110 | 4.6566580  |
| C | 1.7883820  | 12.1494940 | 3.3185150  |
| H | 1.6575340  | 11.4864460 | 2.4571220  |
| H | 2.6809230  | 11.8136760 | 3.8595180  |
| H | 0.9263720  | 12.0100580 | 3.9740860  |
| C | 3.1152280  | 13.6286660 | 1.8100230  |
| H | 4.0268920  | 13.1922830 | 2.2331830  |
| H | 2.8330100  | 13.0410180 | 0.9293830  |
| H | 3.3583780  | 14.6331070 | 1.4509450  |
| C | 0.0813740  | 13.6899330 | 1.0969080  |
| H | 0.5097530  | 14.1220430 | 0.1856360  |
| H | 0.1311100  | 12.5980620 | 1.0895630  |
| S | -1.7541050 | 14.0075820 | 0.8785220  |
| O | -2.1950720 | 13.7617970 | -0.6601850 |
| O | -2.5926930 | 13.1872080 | 1.9849570  |
| O | -1.9268820 | 15.6648330 | 1.2635740  |
| H | -1.7456410 | 16.2849400 | 0.4386570  |



|   |            |            |            |
|---|------------|------------|------------|
| H | -0.7973790 | 13.4182700 | 3.7432770  |
| H | -0.9312030 | 15.1590490 | 3.6221030  |
| O | 0.9244500  | 16.5288480 | 1.2730330  |
| C | 12.8041120 | -6.8755000 | 3.4668530  |
| C | 13.2751640 | -8.1379270 | 2.7054960  |
| C | 13.4056360 | -6.5039870 | 1.1163190  |
| C | 12.8619730 | -5.8296680 | 2.3629390  |
| H | 11.7913100 | -6.9528070 | 3.8726960  |
| H | 13.4690230 | -6.5900880 | 4.2877240  |
| C | 14.3806490 | -7.5706970 | 1.7515990  |
| C | 12.1350580 | -8.5151260 | 1.7203160  |
| H | 12.2920900 | -9.4950000 | 1.2655340  |
| H | 11.1626350 | -8.5410830 | 2.2208620  |
| C | 12.2068360 | -7.3859500 | 0.6456290  |
| H | 13.6081810 | -8.9503660 | 3.3536940  |
| C | 14.9140900 | -8.6069170 | 0.7477900  |
| H | 15.6221570 | -8.1450940 | 0.0511210  |
| H | 15.4415850 | -9.3972230 | 1.2956570  |
| H | 14.1268650 | -9.0702510 | 0.1496780  |
| C | 15.5897860 | -6.9197690 | 2.4559750  |
| H | 16.1227120 | -7.6685720 | 3.0526550  |
| H | 16.2840600 | -6.5210730 | 1.7075240  |
| H | 15.3250180 | -6.0846750 | 3.1127350  |
| C | 14.1033550 | -5.6112790 | 0.1254430  |
| H | 14.7245870 | -4.8486000 | 0.6008610  |
| H | 14.6895530 | -6.1901080 | -0.5942280 |
| S | 13.0284120 | -4.5906340 | -1.0414040 |
| O | 13.7885470 | -3.2195690 | -1.4064090 |
| O | 12.5494630 | -5.4646250 | -2.3009590 |
| O | 11.5537800 | -4.2460610 | -0.1768940 |
| H | 11.7200510 | -4.0865150 | 0.7931070  |
| H | 12.4119950 | -7.7898430 | -0.3468220 |
| H | 11.2849670 | -6.8051910 | 0.5830580  |

|   |             |            |            |
|---|-------------|------------|------------|
| O | 12.4741590  | -4.6494910 | 2.4393470  |
| C | -14.2423010 | -4.8983950 | 3.6031950  |
| C | -12.8590340 | -4.9030210 | 4.2976150  |
| C | -12.4757270 | -6.0878900 | 2.3782070  |
| C | -13.9502770 | -5.6718130 | 2.3148040  |
| H | -15.0252660 | -5.3902830 | 4.1878890  |
| H | -14.6016640 | -3.8961800 | 3.3520980  |
| C | -11.8626410 | -4.8196280 | 3.0919320  |
| C | -12.6320070 | -6.3381780 | 4.8288850  |
| H | -11.7543980 | -6.3914140 | 5.4781750  |
| H | -13.4889250 | -6.6917400 | 5.4093060  |
| C | -12.4247100 | -7.1656490 | 3.5226410  |
| H | -12.7327520 | -4.1162900 | 5.0434660  |
| C | -10.3827870 | -4.9816090 | 3.4814740  |
| H | -9.7427130  | -4.9318510 | 2.5920150  |
| H | -10.0854510 | -4.1588350 | 4.1419550  |
| H | -10.1647460 | -5.9208770 | 3.9940040  |
| C | -11.9926250 | -3.5239800 | 2.2644020  |
| H | -11.7804260 | -2.6557980 | 2.8982120  |
| H | -11.2626160 | -3.5249330 | 1.4488670  |
| H | -12.9818410 | -3.3816820 | 1.8177910  |
| C | -11.8736980 | -6.4129800 | 1.0252850  |
| H | -12.4436100 | -6.0004010 | 0.1889490  |
| H | -10.8260650 | -6.1103070 | 0.9417230  |
| S | -11.7396420 | -8.2334020 | 0.6082860  |
| O | -11.4176540 | -8.4225660 | -0.9582930 |
| O | -10.7059940 | -8.9267510 | 1.6379990  |
| O | -13.3056730 | -8.8362800 | 0.9526490  |
| H | -13.4614740 | -9.7460840 | 0.4647800  |
| H | -11.4642650 | -7.6835970 | 3.5083530  |
| H | -13.1934940 | -7.9265230 | 3.3688930  |
| O | -14.7355470 | -5.8718640 | 1.3825410  |

**MMM $\Rightarrow$ 3R**

|   | X           | Y           | Z          |
|---|-------------|-------------|------------|
| C | -8.9962580  | 10.5200790  | 1.3069780  |
| H | -8.8065280  | 10.6172120  | 0.2322680  |
| H | -8.2049100  | 11.0429910  | 1.8535670  |
| C | -10.3754660 | 11.0774890  | 1.6642320  |
| H | -11.1511620 | 10.3733170  | 1.3293710  |
| H | -10.4686250 | 11.2221980  | 2.7408580  |
| C | -10.9518350 | 12.3569100  | -0.3302020 |
| H | -11.8806950 | 11.7759980  | -0.4614290 |
| H | -10.1627550 | 11.8886010  | -0.9293810 |
| C | -11.2032790 | 13.7759940  | -0.8264610 |
| H | -11.6303290 | 13.7218530  | -1.8324900 |
| H | -11.9258760 | 14.2699050  | -0.1604840 |
| C | -6.7327880  | 15.8974490  | -1.6970060 |
| H | -7.1742630  | 16.7228030  | -2.2732070 |
| C | -5.2190070  | 16.1061120  | -1.6521200 |
| H | -4.8615680  | 16.3189550  | -2.6717460 |
| H | -5.0021140  | 16.9638720  | -1.0117060 |
| C | -4.0327840  | 13.9431280  | -1.9748620 |
| H | -3.9273650  | 14.3283700  | -3.0007900 |
| H | -4.7707840  | 13.1311510  | -1.9764680 |
| C | -2.6591570  | 13.4547580  | -1.5126390 |
| H | -2.1886210  | 12.8497990  | -2.2962400 |
| H | -2.0316240  | 14.3236640  | -1.3041370 |
| C | 2.0948980   | 4.1642190   | 0.1050970  |
| C | 3.1338350   | 3.5236140   | 0.0982890  |
| C | 2.9089990   | -4.0057260  | -0.1991800 |
| C | 1.8332390   | -4.5822570  | -0.2012400 |
| O | -3.4193680  | -12.6767190 | 0.7778060  |
| C | -3.9302260  | -13.2405690 | 2.0201520  |
| H | -4.7635020  | -12.6419940 | 2.4023500  |
| H | -3.1221190  | -13.2323710 | 2.7643090  |

|   |             |             |            |
|---|-------------|-------------|------------|
| C | -4.3851910  | -14.6837910 | 1.7940720  |
| H | -3.6762210  | -15.1972080 | 1.1419390  |
| H | -4.3884940  | -15.1782670 | 2.7798810  |
| O | -5.6758820  | -14.8594910 | 1.1660820  |
| C | -6.7884900  | -14.2257770 | 1.8517190  |
| H | -6.9709240  | -13.2466910 | 1.4005300  |
| H | -6.5548000  | -14.0883900 | 2.9192220  |
| C | -8.0607110  | -15.0560920 | 1.7582440  |
| H | -7.8360590  | -16.1129860 | 1.9619440  |
| H | -8.7568360  | -14.6807120 | 2.5252460  |
| O | -8.6478170  | -14.9167070 | 0.4421510  |
| C | -10.0082950 | -15.3905000 | 0.3113860  |
| H | -10.1713770 | -16.2821580 | 0.9365300  |
| H | -10.1259440 | -15.6682890 | -0.7386030 |
| C | -11.0643500 | -14.3371390 | 0.6533090  |
| H | -12.0529730 | -14.8231740 | 0.6764060  |
| H | -10.8727220 | -13.8922050 | 1.6440400  |
| O | -11.0273670 | -13.3144750 | -0.3674450 |
| C | -12.0745610 | -12.3116860 | -0.2892140 |
| H | -12.3257090 | -12.1109990 | 0.7651410  |
| H | -12.9703480 | -12.6846590 | -0.8033540 |
| C | -11.6182470 | -11.0018510 | -0.9173160 |
| H | -12.4015200 | -10.2462780 | -0.7366870 |
| H | -10.6928400 | -10.6420800 | -0.4589170 |
| O | -11.4572970 | -11.1947630 | -2.3451910 |
| C | -11.1326580 | -10.0030200 | -3.0919200 |
| H | -11.7917950 | -9.1675420  | -2.8101560 |
| H | -11.3326430 | -10.2751910 | -4.1315910 |
| C | -9.6795510  | -9.5384930  | -2.9840250 |
| H | -9.0147310  | -10.3985220 | -2.8343850 |
| H | -9.4044370  | -9.0157970  | -3.9112140 |
| O | -9.5573870  | -8.6146330  | -1.8633200 |
| C | -4.6019880  | -0.5690710  | -0.0844380 |

|   |             |             |            |
|---|-------------|-------------|------------|
| C | -4.5627940  | 0.6483970   | -0.0076370 |
| O | -9.0079680  | 9.0909350   | 1.6449180  |
| O | -10.5906390 | 12.3899530  | 1.0699940  |
| O | -10.0155390 | 14.5981590  | -0.9636700 |
| O | -4.4584650  | 15.0099060  | -1.0853390 |
| O | -2.6903200  | 12.6968520  | -0.2680060 |
| C | -6.7755480  | -12.2807990 | -2.2123880 |
| C | -7.9517130  | -12.6655640 | -1.5552330 |
| C | -8.3627580  | -11.9837970 | -0.4066740 |
| C | -7.6184150  | -10.9116060 | 0.0922720  |
| C | -6.4349580  | -10.5332380 | -0.5551700 |
| C | -6.0201420  | -11.2153730 | -1.7064870 |
| H | -6.4450950  | -12.8102330 | -3.0999750 |
| H | -8.5506440  | -13.4957890 | -1.9048670 |
| H | -9.2731870  | -12.3108720 | 0.0716450  |
| H | -5.8634290  | -9.6774450  | -0.2086280 |
| H | -5.1179500  | -10.8977580 | -2.2148830 |
| C | -8.0931670  | -10.1859940 | 1.3467990  |
| C | -7.6470600  | -10.9691980 | 2.5875910  |
| O | -8.4374820  | -11.5496410 | 3.3340400  |
| O | -6.3054930  | -10.9961970 | 2.8149660  |
| H | -5.7680500  | -10.5733410 | 2.1066350  |
| C | -7.3466980  | 10.5301520  | -2.3033670 |
| C | -7.8688330  | 11.8191230  | -2.1058000 |
| C | -7.4334290  | 12.5973270  | -1.0260840 |
| C | -6.4458340  | 12.1202210  | -0.1483810 |
| C | -5.9440100  | 10.8280590  | -0.3393280 |
| C | -6.3956750  | 10.0346830  | -1.4034070 |
| H | -7.6900620  | 9.9173280   | -3.1304010 |
| H | -8.6223670  | 12.2190750  | -2.7777100 |
| H | -7.9049580  | 13.5534900  | -0.8476980 |
| H | -5.2122170  | 10.4176790  | 0.3455410  |
| H | -6.0058700  | 9.0297220   | -1.5138630 |

|   |             |            |            |
|---|-------------|------------|------------|
| C | -5.8709950  | 13.0624020 | 0.9002060  |
| C | -5.2434320  | 12.3638380 | 2.1109090  |
| O | -5.8440550  | 11.6289220 | 2.8900600  |
| O | -3.9213950  | 12.6661960 | 2.3160120  |
| H | -3.4954910  | 13.0938040 | 1.5385800  |
| C | -9.5897060  | 15.2668790 | 0.2563700  |
| H | -9.1422440  | 14.5498740 | 0.9531770  |
| H | -10.4653470 | 15.7228360 | 0.7437590  |
| C | -8.6233320  | 16.3854220 | -0.1146000 |
| H | -8.5534630  | 17.0890230 | 0.7200020  |
| H | -8.9931070  | 16.9108960 | -1.0031690 |
| H | -6.9952110  | 14.9512120 | -2.1842670 |
| O | -7.2517550  | 15.9273700 | -0.3427540 |
| C | 13.8793200  | 2.3865720  | 1.3387260  |
| H | 13.9656090  | 2.2228540  | 0.2581770  |
| H | 13.8605530  | 1.4196570  | 1.8484820  |
| C | 15.0470260  | 3.2197370  | 1.8642430  |
| H | 14.9948200  | 4.2431830  | 1.4651480  |
| H | 15.0236630  | 3.2609930  | 2.9536300  |
| C | 16.7663600  | 2.8684160  | 0.1671970  |
| H | 16.9089190  | 3.9545150  | 0.0362760  |
| H | 16.0331600  | 2.5225960  | -0.5709920 |
| C | 18.1039760  | 2.1767310  | -0.0707900 |
| H | 18.5329940  | 2.5596400  | -1.0019200 |
| H | 18.7848780  | 2.4167860  | 0.7587190  |
| C | 17.5043360  | -2.3295770 | -1.4990360 |
| H | 18.5232120  | -2.5646410 | -1.8405530 |
| C | 16.5629920  | -3.4568250 | -1.9139900 |
| H | 16.6320160  | -3.6067030 | -3.0011700 |
| H | 16.8655370  | -4.3775920 | -1.4062400 |
| C | 14.2018700  | -2.9791750 | -2.5458790 |
| H | 14.6758590  | -2.8741340 | -3.5333670 |
| H | 13.6785660  | -2.0459120 | -2.3208090 |

|   |            |            |            |
|---|------------|------------|------------|
| C | 13.2223680 | -4.1545720 | -2.6020560 |
| H | 12.5823470 | -4.0712620 | -3.4914820 |
| H | 13.7725690 | -5.0958220 | -2.6502950 |
| O | 12.6420980 | 3.1334270  | 1.5950120  |
| O | 16.3163140 | 2.5968100  | 1.5149180  |
| O | 18.0300880 | 0.7405240  | -0.2540360 |
| O | 15.1971770 | -3.1732770 | -1.5151970 |
| O | 12.4075580 | -4.2847220 | -1.4073060 |
| C | 13.4737270 | 1.0473380  | -2.3678590 |
| C | 14.7585050 | 0.7047050  | -1.9167550 |
| C | 14.9175810 | -0.1303020 | -0.8037290 |
| C | 13.8031470 | -0.6689750 | -0.1477300 |
| C | 12.5229250 | -0.3055320 | -0.5856950 |
| C | 12.3569610 | 0.5507570  | -1.6830080 |
| H | 13.3462420 | 1.6996380  | -3.2255760 |
| H | 15.6410570 | 1.0843180  | -2.4228160 |
| H | 15.9120970 | -0.3531520 | -0.4527210 |
| H | 11.6378880 | -0.6748950 | -0.0820730 |
| H | 11.3547020 | 0.8235190  | -1.9932450 |
| C | 13.9856220 | -1.7105340 | 0.9649060  |
| C | 13.1632760 | -1.3259070 | 2.2062310  |
| O | 13.5337780 | -0.5569610 | 3.0847850  |
| O | 11.9089900 | -1.8911460 | 2.2830050  |
| H | 11.6651780 | -2.4564370 | 1.5203590  |
| C | 18.0191390 | -0.0513710 | 0.9691580  |
| H | 17.0260360 | -0.0509440 | 1.4301340  |
| H | 18.7329340 | 0.3770800  | 1.6889880  |
| C | 18.4761180 | -1.4662760 | 0.6350190  |
| H | 18.6705880 | -2.0012510 | 1.5680560  |
| H | 19.3946230 | -1.4312120 | 0.0352120  |
| H | 17.1973500 | -1.3688090 | -1.9274810 |
| O | 17.4763080 | -2.2767800 | -0.0527140 |
| C | -3.3936630 | -8.5275770 | 0.0517930  |

|   |            |             |            |
|---|------------|-------------|------------|
| C | -2.9778410 | -9.4683330  | -0.9134350 |
| H | -2.6791830 | -9.1212870  | -1.8978650 |
| C | -2.9677800 | -10.8352190 | -0.6352620 |
| H | -2.7011660 | -11.5639900 | -1.3913500 |
| C | -3.3482250 | -11.3039330 | 0.6354640  |
| C | -3.6392650 | -10.3739610 | 1.6507910  |
| H | -3.7738480 | -10.6918260 | 2.6794830  |
| C | -3.6861190 | -9.0006340  | 1.3403860  |
| H | -3.9381270 | -8.2883450  | 2.1213440  |
| C | -3.3860720 | -7.0497650  | -0.2130740 |
| C | -1.6672840 | -5.4852500  | -1.1969150 |
| H | -2.3889110 | -5.2168470  | -1.9608700 |
| C | -0.4046840 | -4.8922450  | -1.2022630 |
| H | -0.1466770 | -4.1649430  | -1.9641560 |
| C | 0.5455720  | -5.2232210  | -0.2130280 |
| C | 0.2036550  | -6.1845010  | 0.7597180  |
| H | 0.9319520  | -6.4570620  | 1.5158020  |
| C | -1.0602530 | -6.7822160  | 0.7526150  |
| H | -1.3005240 | -7.5284850  | 1.5029970  |
| C | -2.0264410 | -6.4229050  | -0.2067260 |
| C | -4.5549160 | -4.8350830  | -0.3327590 |
| C | -5.2415050 | -4.0686950  | -1.2937760 |
| H | -5.7566780 | -4.5704600  | -2.1069360 |
| C | -5.2595490 | -2.6728800  | -1.2188540 |
| H | -5.7774450 | -2.0920230  | -1.9743090 |
| C | -4.6084250 | -2.0053240  | -0.1609890 |
| C | -3.9544500 | -2.7727910  | 0.8261390  |
| H | -3.4634160 | -2.2689250  | 1.6513220  |
| C | -3.9305620 | -4.1651010  | 0.7383310  |
| H | -3.4186310 | -4.7427110  | 1.5006340  |
| C | -4.5265060 | -6.3289140  | -0.4206700 |
| C | -5.9669150 | -7.6364770  | -2.0111180 |
| H | -5.0959430 | -7.7505570  | -2.6497790 |



|   |            |            |            |
|---|------------|------------|------------|
| C | -7.1933590 | -8.1780030 | -2.4230640 |
| H | -7.2411370 | -8.7263100 | -3.3556890 |
| C | -8.3159600 | -8.0638080 | -1.5884700 |
| C | -8.2136340 | -7.3496730 | -0.3801670 |
| H | -9.0961130 | -7.2692460 | 0.2441840  |
| C | -6.9901520 | -6.7968830 | 0.0053700  |
| H | -6.9247890 | -6.2374080 | 0.9339780  |
| C | -5.8341670 | -6.9601630 | -0.7876810 |
| C | 9.1749560  | 1.0131040  | 0.4484280  |
| C | 9.5483710  | 2.2047660  | -0.2047260 |
| H | 8.9378690  | 2.5797320  | -1.0211250 |
| C | 10.6987820 | 2.9051960  | 0.1789430  |
| H | 11.0105250 | 3.8039690  | -0.3411730 |
| C | 11.4754480 | 2.4356750  | 1.2480810  |
| C | 11.0772420 | 1.2965430  | 1.9602450  |
| H | 11.6540190 | 0.9591390  | 2.8141970  |
| C | 9.9430780  | 0.5862230  | 1.5493130  |
| H | 9.6537640  | -0.3037950 | 2.0977400  |
| C | 7.9132310  | 0.2911640  | 0.0908440  |
| C | 5.7486620  | 1.0539290  | -0.9661320 |
| H | 5.9290060  | 0.3591060  | -1.7796200 |
| C | 4.5952140  | 1.8399290  | -0.9701230 |
| H | 3.8810380  | 1.7581760  | -1.7821220 |
| C | 4.3399710  | 2.7395600  | 0.0862540  |
| C | 5.2836050  | 2.8480890  | 1.1289920  |
| H | 5.1017810  | 3.5453340  | 1.9395310  |
| C | 6.4422180  | 2.0663720  | 1.1201690  |
| H | 7.1650650  | 2.1660050  | 1.9237640  |
| C | 6.6804450  | 1.1399460  | 0.0869300  |
| C | 6.5839300  | -1.8220640 | -0.1767580 |
| C | 6.3087870  | -2.7550540 | -1.1951560 |
| H | 7.0353680  | -2.9128280 | -1.9862600 |
| C | 5.1089540  | -3.4721480 | -1.2085030 |

|   |            |            |            |
|---|------------|------------|------------|
| H | 4.9011190  | -4.1750490 | -2.0080320 |
| C | 4.1571930  | -3.2908510 | -0.1841380 |
| C | 4.4470500  | -2.3865480 | 0.8594480  |
| H | 3.7279040  | -2.2507800 | 1.6596450  |
| C | 5.6423870  | -1.6666100 | 0.8606140  |
| H | 5.8503460  | -0.9721860 | 1.6673780  |
| C | 7.8646430  | -1.0480840 | -0.1692800 |
| C | 9.7424960  | -1.6908480 | -1.7181490 |
| H | 9.4039250  | -0.9110600 | -2.3933670 |
| C | 10.8415200 | -2.4846440 | -2.0852200 |
| H | 11.3408230 | -2.2875770 | -3.0262900 |
| C | 11.3035680 | -3.4707430 | -1.2024900 |
| C | 10.6191730 | -3.6949050 | 0.0096590  |
| H | 10.9478190 | -4.5123500 | 0.6433940  |
| C | 9.5129110  | -2.9089610 | 0.3477620  |
| H | 8.9867770  | -3.0984760 | 1.2781360  |
| C | 9.0788810  | -1.8648110 | -0.4939080 |
| C | -1.6250040 | 6.2725830  | 0.1583460  |
| C | -0.6417740 | 6.5733350  | -0.8040680 |
| H | -0.8340520 | 7.3474790  | -1.5403510 |
| C | 0.5749290  | 5.8855230  | -0.8294830 |
| H | 1.3174760  | 6.1163020  | -1.5857690 |
| C | 0.8523610  | 4.8888330  | 0.1283910  |
| C | -0.1148490 | 4.6109390  | 1.1173060  |
| H | 0.0946220  | 3.8567990  | 1.8679010  |
| C | -1.3316220 | 5.2939040  | 1.1296100  |
| H | -2.0654980 | 5.0682150  | 1.8955530  |
| C | -2.9254860 | 7.0125560  | 0.1808120  |
| C | -3.1554560 | 9.1138030  | -1.2016990 |
| H | -3.5462330 | 8.5078360  | -2.0129820 |
| C | -3.0694300 | 10.5069960 | -1.3643580 |
| H | -3.4312650 | 10.9548940 | -2.2829870 |
| C | -2.6303600 | 11.2909610 | -0.2928270 |

|   |            |             |            |
|---|------------|-------------|------------|
| C | -2.1736330 | 10.6843040  | 0.8879420  |
| H | -1.8103920 | 11.3019060  | 1.6990330  |
| C | -2.2523050 | 9.2991190   | 1.0273710  |
| H | -1.9191790 | 8.8363690   | 1.9506820  |
| C | -2.7954450 | 8.4966260   | 0.0052480  |
| C | -5.3962260 | 7.1138240   | 0.6946950  |
| C | -6.6072200 | 6.7731080   | 0.0565930  |
| H | -6.6098670 | 5.9994400   | -0.7055450 |
| C | -7.8028990 | 7.4265800   | 0.3797350  |
| H | -8.7292890 | 7.1885420   | -0.1308870 |
| C | -7.8070550 | 8.4217040   | 1.3673850  |
| C | -6.6313760 | 8.7227740   | 2.0672380  |
| H | -6.6346060 | 9.4823440   | 2.8399380  |
| C | -5.4391070 | 8.0760040   | 1.7241940  |
| H | -4.5350820 | 8.3218630   | 2.2700100  |
| C | -4.1277660 | 6.3902390   | 0.3634200  |
| C | -3.7184610 | 4.2066640   | -0.8394080 |
| H | -3.2051130 | 4.7614200   | -1.6176870 |
| C | -3.8278350 | 2.8181980   | -0.9351220 |
| H | -3.4026620 | 2.2937410   | -1.7837970 |
| C | -4.4810080 | 2.0821750   | 0.0755120  |
| C | -5.0425760 | 2.7767820   | 1.1673280  |
| H | -5.5566810 | 2.2205570   | 1.9435690  |
| C | -4.9395090 | 4.1681450   | 1.2496130  |
| H | -5.3844590 | 4.6932320   | 2.0889460  |
| C | -4.2553200 | 4.9013370   | 0.2614210  |
| H | -5.0913830 | 13.6489510  | 0.3999350  |
| O | -6.8429090 | 13.9789630  | 1.4362650  |
| H | -6.8754310 | 14.7796750  | 0.8542720  |
| O | -9.5178780 | -10.0262040 | 1.4000410  |
| H | -9.8793340 | -10.5918300 | 2.1133100  |
| H | -7.6363980 | -9.1904970  | 1.3835260  |
| O | 15.3241990 | -1.8430510  | 1.4187800  |

|   |            |            |           |
|---|------------|------------|-----------|
| H | 15.9412920 | -2.1999080 | 0.7309690 |
| H | 13.6196090 | -2.6726450 | 0.5697190 |
